# Supplementary material
Source: PubMed Central journal article supplement (PMC6613311)
Supplement: jamaoncol-5-e191460-s001.pdf [file jamaoncol-5-e191460-s001.pdf]

## Supplementary Online Content

Islami F, Miller KD, Siegel RL, et al. National and state estimates of lost earnings from cancer deaths in the United States. *JAMA Oncol*. Published online July 3, 2019.

doi:10.1001/jamaoncol.2019.1460

### **eMethods.** Detailed Methods

**eTable 1.** Employment Status (Full-Time, Part-Time) and Unadjusted Median Annual Earnings by Sex, Age Group, and Education Level, United States, 2015

**eTable 2.** Cancer Types With Highest Person-Years of Life Lost and Lost Earnings by Sex and Age Group, United States, 2015

**eTable 3.** Number of Cancer Deaths and Associated PYLL and Lost Earnings for Major Cancer Sites in Ages 16-84 Years by Sex at the National- and State-Levels, United States, 2015

**eTable 4.** Lost Earnings (Calculated Based on Decedents' Education Level) for Major Cancer Sites in Ages 16-84 Years by Sex at the National- and State-Level, 2015

**eFigure 1.** Potentially Avoidable PYLL and Lost Earnings in Ages 16-84 Years in Both Sexes Combined by State if Age-Specific PYLL or Lost Earning Rates for All Cancers Combined in All States Were Similar to Those in Utah, 2015

**eFigure 2.** Potentially Avoidable Lost Earnings (Calculated Based on Decedents' Education Level) in Ages 16-84 Years in Both Sexes Combined by State if Age-Specific Lost Earning Rates for All Cancers Combined in All States Were Similar to Those in Wyoming, 2015

This supplementary material has been provided by the authors to give readers additional information about their work.

## eMethods. Detailed Methods

We limited our analysis to ages 16-84 years, for which both wage and employment data and state population estimates for age-standardization were available in single years. Eleven decedents with unknown age (0.002%) were excluded from this analysis. Data on annual median earnings of employed primary or sole salary and wage workers in 2015 were stratified by age group (16-19, 20-24 ... 80-84 years), sex, education level, and employment status (non-worker, including those not in the labor force and unemployed persons; employed part-time; employed full-time).

We show results for all ages combined; results by age group for adolescents and young adults aged 16-39 years and adults in five other age groups (40-49, 50-59, 60-69, 70-79, and 80-84 years) are shown only for all cancers combined at the national level due to relatively modest numbers of cancer deaths for many cancer sites or by state, particularly in younger age groups. The 2016 Current Population Survey March supplement was used to obtain earnings data due to the survey's inclusion of an annual earnings estimate for respondents. Annual earnings data were based on the reported 2015 earnings of employed primary or sole wage and salary workers, excluding all self-employed persons regardless of incorporation status, before taxes and other deductions and included any overtime pay, commissions, or tips usually received, consistent with definitions used in U.S. Bureau of Labor Statistics' earnings reports for the United States. As some older individuals aged  $\leq 84$  years were expected to live a few years beyond age 84 years in the absence of premature death, we used annual earnings data of ages 80-84 years to estimate lost earnings during the residual life expectancy beyond age 84 years. To quantify the effects of uncertainty in wage and employment status data and generate confidence intervals for our estimates, we applied a simulation method (using standard errors from the data source, i.e., the 2016 Current Population Survey March supplement) with 1000 replications for each age group and sex stratum. Average annual earnings for each age and sex group was calculated using the following equation, in which  $P$  represented proportions of full- or part-time employees and  $E$  represented median annual earnings in the corresponding group:

$$\text{Average annual earnings} = (P_{\text{full-time}} \times E_{\text{full-time}}) + (P_{\text{part-time}} \times E_{\text{part-time}})$$

The reported total lost earnings, lost earning rates, and average lost earnings per death are the medians of the corresponding values from 1000 replications, and the limits of 95% confidence intervals are 25th and 975th ordered values. Because lost earnings overall and by sex were from separate simulation models and due to rounding, lost earnings in men and women may not add up to totals.

**Additional analysis by education level.** We estimated lost earnings based on decedents' education level in an additional analysis because deaths from many cancer sites occur more commonly in persons with lower education (and often, lower earnings) than higher education due to higher exposure to known cancer risk factors (e.g., smoking) or more limited access to care; thus, lost earnings estimated based on median earnings for all education levels combined may overestimate the actual amount of lost earnings. However, results based on decedents' education level might be more difficult to interpret when comparing lost earning rates across states, because in this case a lower rate in a state might not necessarily or entirely reflect lower cancer burden, as it could also be a result of greater proportions of people with lower education levels and earnings in that state. For example, between two states with the same PYLL rate, the state with lower education level would have a lower age-standardized lost earnings rate. Therefore, although we presented results from both approaches, we highlighted the estimates based on median earnings for all education levels combined to focus more on differences in the burden of cancer rather than variations in education levels across states.

Due to state-level differences in how educational attainment is reported on death certificates, highest attained education level was collapsed into three broad groups (high school diploma/GED or less, some college or baccalaureate degree, or more than baccalaureate) to ensure consistency across states with different reporting standards. The attained education level for cancer deaths with missing information ( $N = 19,663$ ; 4.0% of all cancer deaths included in this study) was imputed based on the distribution of education levels in the corresponding age (single year) and sex.

Average annual earnings for each age, sex, and education group using the equation described above. Age-, sex-, and education-specific lost earnings were calculated by multiplying person-years of life lost (PYLL) by the annual median earning in the corresponding group in 2015 U.S. dollars. To quantify the effects of uncertainty in wage and employment status data and generate confidence intervals for our estimates, we applied a simulation method with 1000 replications for each age group, sex, and education level stratum. As those who died before age 30 years might have attained a higher education level had they not died prematurely, we adjusted their future annual lost earnings based on education levels in corresponding age groups until age 30 years, and for older ages ( $\geq 30$  years until the end of residual life expectancy), based on education levels in ages 30-34 years. For example, for cancer deaths occurred at age 16-19 years, education levels at ages 20-24, 25-29, and 30-34 years were used for adjustment of future lost earnings in ages 20-24, 25-29, and  $\geq 30$  years, respectively. PYLL and lost earnings were summed over all age and education groups to obtain total PYLL and lost earnings for each cancer site by sex. All other statistical analyses to calculate PYLL and lost earnings (including discounting) were similar to those described in the Methods in the article's text.

Because earnings vary by educational attainment and death certificates are state-level, this sensitivity analysis incorporates differing economic conditions across states.

**eTable 1. Employment status (full-time, part-time) and unadjusted median annual earnings by sex, age group, and education level, United States, 2015**

| Sex, age group | High-school diploma/GED or less |                            |             |                            | Some college or baccalaureate degree |                            |             |                            | More than baccalaureate * |                            |             |                            | All education levels combined |                            |             |                            |
|----------------|---------------------------------|----------------------------|-------------|----------------------------|--------------------------------------|----------------------------|-------------|----------------------------|---------------------------|----------------------------|-------------|----------------------------|-------------------------------|----------------------------|-------------|----------------------------|
|                | % full-time                     | Median full-time earn., \$ | % part-time | Median part-time earn., \$ | % full-time                          | Median full-time earn., \$ | % part-time | Median part-time earn., \$ | % full-time               | Median full-time earn., \$ | % part-time | Median part-time earn., \$ | % full-time                   | Median full-time earn., \$ | % part-time | Median part-time earn., \$ |
| <b>Men</b>     |                                 |                            |             |                            |                                      |                            |             |                            |                           |                            |             |                            |                               |                            |             |                            |
| 16-19          | 6.3                             | 15,762                     | 17.7        | 3,983                      | 13.8                                 | 19,154                     | 28.9        | 6,786                      | –                         | –                          | –           | –                          | 7.3                           | 16,080                     | 19.1        | 4,594                      |
| 20-24          | 50.8                            | 21,157                     | 13.7        | 11,452                     | 38.4                                 | 24,984                     | 25.1        | 8,979                      | 48.2                      | 34,966                     | 7.9         | 2,200                      | 43.9                          | 23,900                     | 20.0        | 9,921                      |
| 25-29          | 67.0                            | 29,812                     | 8.7         | 13,486                     | 74.3                                 | 41,757                     | 10.4        | 15,188                     | 82.2                      | 55,805                     | 7.4         | 21,919                     | 72.1                          | 37,901                     | 9.6         | 15,000                     |
| 30-34          | 70.9                            | 32,204                     | 7.4         | 12,302                     | 82.5                                 | 49,989                     | 6.1         | 19,727                     | 92.3                      | 71,397                     | 3.3         | 19,210                     | 79.1                          | 45,812                     | 6.3         | 16,183                     |
| 35-39          | 72.4                            | 34,837                     | 6.4         | 17,094                     | 84.3                                 | 59,843                     | 4.3         | 24,287                     | 90.2                      | 90,616                     | 3.3         | 21,605                     | 80.3                          | 51,607                     | 5.0         | 17,870                     |
| 40-44          | 74.9                            | 37,378                     | 5.1         | 14,531                     | 85.2                                 | 59,814                     | 3.9         | 23,814                     | 93.1                      | 94,737                     | 2.9         | 21,917                     | 82.2                          | 54,993                     | 4.3         | 17,371                     |
| 45-49          | 72.7                            | 39,611                     | 4.8         | 15,516                     | 82.8                                 | 64,826                     | 4.3         | 19,431                     | 90.9                      | 99,792                     | 3.2         | 40,063                     | 79.7                          | 57,784                     | 4.3         | 19,257                     |
| 50-54          | 68.8                            | 41,224                     | 4.9         | 19,506                     | 81.5                                 | 64,777                     | 4.4         | 29,772                     | 87.6                      | 99,904                     | 5.9         | 29,970                     | 76.7                          | 58,204                     | 4.8         | 25,256                     |
| 55-59          | 61.1                            | 44,733                     | 5.6         | 14,842                     | 73.2                                 | 64,482                     | 5.7         | 24,462                     | 82.1                      | 101,040                    | 6.4         | 63,838                     | 68.9                          | 57,867                     | 5.7         | 19,999                     |
| 60-64          | 45.3                            | 41,830                     | 6.7         | 15,726                     | 54.1                                 | 59,930                     | 7.6         | 23,378                     | 63.6                      | 99,445                     | 12.2        | 26,736                     | 51.9                          | 59,118                     | 7.9         | 18,555                     |
| 65-69          | 19.6                            | 39,655                     | 8.3         | 15,007                     | 27.0                                 | 62,748                     | 10.8        | 19,314                     | 38.0                      | 99,220                     | 15.8        | 32,635                     | 26.1                          | 59,246                     | 10.7        | 19,576                     |
| 70-74          | 10.7                            | 44,951                     | 7.0         | 13,695                     | 14.4                                 | 60,037                     | 10.5        | 19,429                     | 17.6                      | 92,149                     | 14.0        | 21,192                     | 13.3                          | 59,562                     | 9.5         | 15,512                     |
| 75-79          | 7.6                             | 42,483                     | 5.6         | 13,278                     | 9.1                                  | 43,290                     | 7.3         | 19,011                     | 14.8                      | 86,664                     | 10.3        | 25,308                     | 9.2                           | 48,364                     | 6.9         | 16,089                     |
| 80-84          | 2.7                             | 34,987                     | 3.4         | 11,228                     | 6.9                                  | 39,545                     | 8.5         | 20,498                     | 8.2                       | 127,439                    | 4.6         | 22,047                     | 5.1                           | 44,384                     | 5.4         | 14,663                     |
| <b>Women</b>   |                                 |                            |             |                            |                                      |                            |             |                            |                           |                            |             |                            |                               |                            |             |                            |
| 16-19          | 4.3                             | 11,807                     | 21.3        | 3,954                      | 11.3                                 | 15,020                     | 36.0        | 5,970                      | –                         | –                          | –           | –                          | 5.5                           | 12,879                     | 23.7        | 4,616                      |

| Sex, age group | High-school diploma/GED or less |                            |             |                            | Some college or baccalaureate degree |                            |             |                            | More than baccalaureate * |                            |             |                            | All education levels combined |                            |             |                            |
|----------------|---------------------------------|----------------------------|-------------|----------------------------|--------------------------------------|----------------------------|-------------|----------------------------|---------------------------|----------------------------|-------------|----------------------------|-------------------------------|----------------------------|-------------|----------------------------|
|                | % full-time                     | Median full-time earn., \$ | % part-time | Median part-time earn., \$ | % full-time                          | Median full-time earn., \$ | % part-time | Median part-time earn., \$ | % full-time               | Median full-time earn., \$ | % part-time | Median part-time earn., \$ | % full-time                   | Median full-time earn., \$ | % part-time | Median part-time earn., \$ |
| 20-24          | 36.3                            | 17,897                     | 20.0        | 9,896                      | 34.5                                 | 21,485                     | 30.0        | 9,262                      | 55.0                      | 34,936                     | 18.1        | 31,022                     | 35.4                          | 19,975                     | 26.5        | 9,999                      |
| 25-29          | 40.1                            | 24,699                     | 15.2        | 12,597                     | 60.6                                 | 34,882                     | 15.5        | 16,893                     | 72.0                      | 49,860                     | 11.4        | 20,266                     | 55.8                          | 33,989                     | 15.0        | 15,070                     |
| 30-34          | 41.2                            | 24,986                     | 14.2        | 14,945                     | 60.0                                 | 37,998                     | 13.7        | 17,768                     | 73.2                      | 57,408                     | 10.7        | 23,813                     | 56.5                          | 38,491                     | 13.4        | 17,651                     |
| 35-39          | 41.8                            | 25,942                     | 14.9        | 12,568                     | 60.1                                 | 43,848                     | 14.5        | 16,854                     | 75.9                      | 62,226                     | 10.4        | 29,955                     | 56.9                          | 42,908                     | 14.0        | 15,201                     |
| 40-44          | 45.7                            | 25,873                     | 13.4        | 11,631                     | 61.1                                 | 43,920                     | 14.5        | 15,850                     | 73.0                      | 66,599                     | 14.0        | 29,383                     | 58.0                          | 41,911                     | 14.0        | 14,979                     |
| 45-49          | 48.0                            | 28,982                     | 14.6        | 13,669                     | 63.4                                 | 42,964                     | 14.0        | 14,870                     | 75.3                      | 69,677                     | 10.9        | 27,824                     | 59.6                          | 41,901                     | 13.8        | 14,919                     |
| 50-54          | 45.7                            | 29,998                     | 12.0        | 13,177                     | 61.1                                 | 44,962                     | 13.4        | 18,827                     | 75.1                      | 67,268                     | 12.3        | 25,662                     | 57.1                          | 41,959                     | 12.8        | 17,865                     |
| 55-59          | 44.9                            | 29,650                     | 11.5        | 12,946                     | 56.2                                 | 45,645                     | 13.7        | 19,280                     | 65.9                      | 69,718                     | 12.8        | 33,343                     | 52.9                          | 40,139                     | 12.7        | 17,850                     |
| 60-64          | 27.4                            | 30,238                     | 12.2        | 12,954                     | 41.9                                 | 43,923                     | 13.0        | 14,453                     | 49.2                      | 70,377                     | 11.1        | 32,791                     | 37.0                          | 42,001                     | 12.4        | 14,887                     |
| 65-69          | 12.9                            | 28,297                     | 9.5         | 9,767                      | 19.0                                 | 44,303                     | 14.3        | 14,729                     | 23.7                      | 70,000                     | 13.9        | 30,823                     | 16.9                          | 41,749                     | 12.2        | 13,907                     |
| 70-74          | 5.0                             | 27,636                     | 5.2         | 10,627                     | 7.6                                  | 35,930                     | 12.2        | 11,939                     | 10.0                      | 53,544                     | 11.1        | 11,219                     | 6.6                           | 32,306                     | 8.7         | 11,534                     |
| 75-79          | 2.3                             | 25,301                     | 4.3         | 6,116                      | 5.4                                  | 35,905                     | 5.5         | 10,867                     | 9.8                       | 60,002                     | 10.0        | 30,964                     | 4.1                           | 29,964                     | 5.2         | 9,957                      |
| 80-84          | 0.9                             | 28,533                     | 1.9         | 7,233                      | 2.9                                  | 38,348                     | 2.3         | 3,972                      | 4.0                       | 59,617                     | 2.5         | 6,000                      | 1.7                           | 40,524                     | 2.1         | 7,208                      |

Earn., earnings.

Percentages of non-workers are not shown. Data are from the U.S. Census Bureau's 2016 Current Population Survey March supplement (for more information, see eMethods).

\* A negligible proportion of those aged 16-19 years reported having a "More than baccalaureate" degree. As none of cancer deaths in ages 16-19 years in this study had a "More than baccalaureate" degree, here we do not report employment data for that group.

**eTable 2. Cancer types with highest person-years of life lost and lost earnings by sex and age group, United States, 2015**

| Age group   | Person-years of life lost                                           |                                                               |                                                          | Total lost earnings                                                 |                                                               |                                                          |
|-------------|---------------------------------------------------------------------|---------------------------------------------------------------|----------------------------------------------------------|---------------------------------------------------------------------|---------------------------------------------------------------|----------------------------------------------------------|
|             | Both sexes combined                                                 | Men                                                           | Women                                                    | Both sexes combined                                                 | Men                                                           | Women                                                    |
| 16-39 years | Breast (female)<br>Leukemia<br>Brain, ONS<br>Colorectum<br>Lymphoma | Leukemia<br>Brain, ONS<br>Colorectum<br>Lymphoma<br>Lung      | Breast<br>Cervix<br>Brain, ONS<br>Leukemia<br>Colorectum | Leukemia<br>Brain, ONS<br>Colorectum<br>Breast (female)<br>Lymphoma | Leukemia<br>Brain, ONS<br>Colorectum<br>Lymphoma<br>Lung      | Breast<br>Cervix<br>Brain, ONS<br>Leukemia<br>Colorectum |
| 40-49       | Breast (female)<br>Lung<br>Colorectum<br>Brain, ONS<br>Pancreas     | Lung<br>Colorectum<br>Brain, ONS<br>Pancreas<br>Liver, IHBD   | Breast<br>Lung<br>Colorectum<br>Cervix<br>Ovary          | Lung<br>Colorectum<br>Breast (female)<br>Brain, ONS<br>Pancreas     | Lung<br>Colorectum<br>Brain, ONS<br>Pancreas<br>Liver, IHBD   | Breast<br>Lung<br>Colorectum<br>Cervix<br>Ovary          |
| 50-59       | Lung<br>Breast (female)<br>Colorectum<br>Pancreas<br>Liver, IHBD    | Lung<br>Colorectum<br>Liver, IHBD<br>Pancreas<br>Esophagus    | Lung<br>Breast<br>Colorectum<br>Pancreas<br>Ovary        | Lung<br>Colorectum<br>Liver, IHBD<br>Pancreas<br>Breast (female)    | Lung<br>Colorectum<br>Liver, IHBD<br>Pancreas<br>Esophagus    | Lung<br>Breast<br>Colorectum<br>Pancreas<br>Ovary        |
| 60-69       | Lung<br>Colorectum<br>Pancreas<br>Breast (female)<br>Liver, IHBD    | Lung<br>Colorectum<br>Liver, IHBD<br>Pancreas<br>Prostate     | Lung<br>Breast<br>Colorectum<br>Pancreas<br>Ovary        | Lung<br>Colorectum<br>Pancreas<br>Liver, IHBD<br>Breast (female)    | Lung<br>Colorectum<br>Liver, IHBD<br>Pancreas<br>Prostate     | Lung<br>Breast<br>Colorectum<br>Pancreas<br>Ovary        |
| 70-79       | Lung<br>Colorectum<br>Pancreas<br>Breast (female)<br>Prostate       | Lung<br>Prostate<br>Colorectum<br>Pancreas<br>Leukemia        | Lung<br>Breast<br>Pancreas<br>Colorectum<br>Ovary        | Lung<br>Colorectum<br>Pancreas<br>Prostate<br>Leukemia              | Lung<br>Prostate<br>Colorectum<br>Pancreas<br>Leukemia        | Lung<br>Breast<br>Pancreas<br>Colorectum<br>Ovary        |
| 80-84       | Lung<br>Colorectum<br>Pancreas<br>Prostate<br>Breast (female)       | Lung<br>Prostate<br>Colorectum<br>Pancreas<br>Urinary Bladder | Lung<br>Breast<br>Colorectum<br>Pancreas<br>Ovary        | Lung<br>Prostate<br>Colorectum<br>Pancreas<br>Leukemia              | Lung<br>Prostate<br>Colorectum<br>Pancreas<br>Urinary Bladder | Lung<br>Breast<br>Colorectum<br>Pancreas<br>Ovary        |

IHBD, intrahepatic bile duct; ONS, other nervous system.

**eTable 3. Number of cancer deaths and associated PYLL and lost earnings for major cancer sites in ages 16-84 years by sex at the national- and state-levels, United States, 2015**

| (eTable 3)<br>State, sex,<br>cancer | No. of<br>cancer<br>deaths | Total<br>PYLL | Age-std.<br>PYLL rate,<br>per 10 <sup>5</sup><br>persons | Total lost<br>earnings,<br>million \$ | Age-std. lost<br>earning rate,<br>million \$ per<br>10 <sup>5</sup> persons | Average lost<br>earnings,<br>\$1000 per<br>death | State<br>rank |
|-------------------------------------|----------------------------|---------------|----------------------------------------------------------|---------------------------------------|-----------------------------------------------------------------------------|--------------------------------------------------|---------------|
| <b>National-level<br/>results</b>   |                            |               |                                                          |                                       |                                                                             |                                                  |               |
| <b>Men</b>                          |                            |               |                                                          |                                       |                                                                             |                                                  |               |
| All cancers                         | 264,776                    | 4,375,435     | 2,770                                                    | 64,652 (62,161–<br>67,369)            | 40.9 (39.4–<br>42.6)                                                        | 244.2 (234.8–<br>254.4)                          | –             |
| <i>By age group</i>                 |                            |               |                                                          |                                       |                                                                             |                                                  |               |
| 16-39 years                         | 4,320                      | 202,494       | 385                                                      | 6,275 (6,180–<br>6,369)               | 11.9 (11.7–<br>12.1)                                                        | 1,452.6<br>(1,430.5–<br>1,474.4)                 | –             |
| 40-49                               | 9,340                      | 313,148       | 1,542                                                    | 9,372 (9,182–<br>9,585)               | 46.1 (45.2–<br>47.2)                                                        | 1,003.4 (983.0–<br>1,026.3)                      | –             |
| 50-59                               | 41,904                     | 1,058,126     | 4,917                                                    | 23,827 (23,114–<br>24,567)            | 110.7 (107.4–<br>114.2)                                                     | 568.6 (551.6–<br>586.3)                          | –             |
| 60-69                               | 82,002                     | 1,487,998     | 8,918                                                    | 18,063 (16,999–<br>19,176)            | 108.3 (101.9–<br>114.9)                                                     | 220.3 (207.3–<br>233.9)                          | –             |
| 70-79                               | 88,329                     | 1,027,538     | 11,544                                                   | 5,754 (4,969–<br>6,545)               | 64.6 (55.8–<br>73.5)                                                        | 65.1 (56.3–<br>74.1)                             | –             |
| 80-84                               | 38,881                     | 286,132       | 11,863                                                   | 1,364 (1,216–<br>1,549)               | 56.6 (50.4–<br>64.2)                                                        | 35.1 (31.3–<br>39.8)                             | –             |
| Lung                                | 74,202                     | 1,167,402     | 739                                                      | 15,427 (14,730–<br>16,178)            | 9.8 (9.3–10.2)                                                              | 207.9 (198.5–<br>218.0)                          | –             |
| Colorectum                          | 23,218                     | 411,919       | 261                                                      | 6,841 (6,611–<br>7,094)               | 4.3 (4.2–4.5)                                                               | 294.6 (284.7–<br>305.5)                          | –             |
| Pancreas                            | 18,924                     | 312,990       | 198                                                      | 4,668 (4,494–<br>4,853)               | 3.0 (2.8–3.1)                                                               | 289.2 (278.4–<br>300.7)                          | –             |
| Liver, intrahepatic<br>bile duct    | 16,141                     | 294,643       | 187                                                      | 4,517 (4,333–<br>4,718)               | 2.9 (2.7–3.0)                                                               | 238.7 (229.0–<br>249.3)                          | –             |
| Brain, other<br>nervous system      | 8,259                      | 172,580       | 109                                                      | 3,380 (3,288–<br>3,477)               | 2.1 (2.1–2.2)                                                               | 409.2 (398.1–<br>421.0)                          | –             |
| Esophagus                           | 11,101                     | 191,320       | 121                                                      | 2,888 (2,776–<br>3,012)               | 1.8 (1.8–1.9)                                                               | 260.1 (250.1–<br>271.3)                          | –             |
| Leukemia                            | 10,625                     | 177,447       | 112                                                      | 2,796 (2,702–<br>2,895)               | 1.8 (1.7–1.8)                                                               | 263.2 (254.3–<br>272.5)                          | –             |
| Head & neck                         | 9,157                      | 166,918       | 106                                                      | 2,711 (2,613–<br>2,814)               | 1.7 (1.7–1.8)                                                               | 296.1 (285.4–<br>307.4)                          | –             |
| Lymphoma                            | 9,820                      | 161,419       | 102                                                      | 2,489 (2,402–<br>2,584)               | 1.6 (1.5–1.6)                                                               | 253.4 (244.6–<br>263.1)                          | –             |
| Prostate                            | 19,229                     | 245,960       | 156                                                      | 2,407 (2,260–<br>2,562)               | 1.5 (1.4–1.6)                                                               | 125.2 (117.6–<br>133.2)                          | –             |
| Kidney, renal<br>pelvis             | 8,279                      | 142,339       | 90                                                       | 2,201 (2,119–<br>2,290)               | 1.4 (1.3–1.4)                                                               | 265.8 (255.9–<br>276.6)                          | –             |
| Stomach                             | 5,858                      | 104,225       | 66                                                       | 1,757 (1,700–<br>1,821)               | 1.1 (1.1–1.2)                                                               | 300.0 (290.1–<br>310.8)                          | –             |
| Melanoma (skin)                     | 4,910                      | 87,735        | 56                                                       | 1,497 (1,449–<br>1,549)               | 0.9 (0.9–1.0)                                                               | 304.8 (295.1–<br>315.4)                          | –             |
| Urinary Bladder                     | 8,161                      | 112,226       | 71                                                       | 1,287 (1,222–<br>1,357)               | 0.8 (0.8–0.9)                                                               | 157.7 (149.7–<br>166.3)                          | –             |

| (eTable 3)<br>State, sex,<br>cancer | No. of<br>cancer<br>deaths | Total<br>PYLL | Age-std.<br>PYLL rate,<br>per 10 <sup>5</sup><br>persons | Total lost<br>earnings,<br>million \$ | Age-std. lost<br>earning rate,<br>million \$ per<br>10 <sup>5</sup> persons | Average lost<br>earnings,<br>\$1000 per<br>death | State<br>rank |
|-------------------------------------|----------------------------|---------------|----------------------------------------------------------|---------------------------------------|-----------------------------------------------------------------------------|--------------------------------------------------|---------------|
| Myeloma                             | 5,631                      | 84,334        | 53                                                       | 1,099 (1,050–<br>1,152)               | 0.7 (0.7–0.7)                                                               | 195.2 (186.4–<br>204.5)                          | –             |
| <b>Women</b>                        |                            |               |                                                          |                                       |                                                                             |                                                  |               |
| All cancers                         | 227,370                    | 4,364,504     | 2,679                                                    | 29,759 (28,892–<br>30,650)            | 18.3 (17.7–<br>18.8)                                                        | 130.9 (127.1–<br>134.8)                          | –             |
| <i>By age group</i>                 |                            |               |                                                          |                                       |                                                                             |                                                  |               |
| 16-39 years                         | 4,615                      | 229,461       | 448                                                      | 3,791 (3,728–<br>3,851)               | 7.4 (7.3–7.5)                                                               | 821.5 (807.8–<br>834.5)                          | –             |
| 40-49                               | 11,468                     | 429,298       | 2,079                                                    | 6,355 (6,217–<br>6,487)               | 30.8 (30.1–<br>31.4)                                                        | 554.1 (542.1–<br>565.6)                          | –             |
| 50-59                               | 37,527                     | 1,077,027     | 4,779                                                    | 11,282 (10,956–<br>11,640)            | 50.1 (48.6–<br>51.6)                                                        | 300.6 (292.0–<br>310.2)                          | –             |
| 60-69                               | 64,657                     | 1,336,891     | 7,265                                                    | 6,216 (5,872–<br>6,568)               | 33.8 (31.9–<br>35.7)                                                        | 96.1 (90.8–<br>101.6)                            | –             |
| 70-79                               | 74,141                     | 992,062       | 9,274                                                    | 1,668 (1,477–<br>1,890)               | 15.6 (13.8–<br>17.7)                                                        | 22.5 (19.9–<br>25.5)                             | –             |
| 80-84                               | 34,962                     | 299,765       | 8,850                                                    | 435 (397–491)                         | 12.8 (11.7–<br>14.5)                                                        | 12.4 (11.3–<br>14.0)                             | –             |
| Breast (female)                     | 34,396                     | 745,895       | 458                                                      | 6,150 (5,991–<br>6,321)               | 3.8 (3.7–3.9)                                                               | 178.8 (174.2–<br>183.8)                          | –             |
| Lung                                | 59,641                     | 1,056,861     | 649                                                      | 5,821 (5,612–<br>6,041)               | 3.6 (3.4–3.7)                                                               | 97.6 (94.1–<br>101.3)                            | –             |
| Colorectum                          | 18,230                     | 354,218       | 217                                                      | 2,559 (2,488–<br>2,634)               | 1.6 (1.5–1.6)                                                               | 140.4 (136.5–<br>144.5)                          | –             |
| Ovary                               | 11,938                     | 234,938       | 144                                                      | 1,629 (1,582–<br>1,679)               | 1.0 (1.0–1.0)                                                               | 136.5 (132.5–<br>140.7)                          | –             |
| Pancreas                            | 16,077                     | 282,343       | 173                                                      | 1,579 (1,525–<br>1,637)               | 1.0 (0.9–1.0)                                                               | 98.2 (94.8–<br>101.9)                            | –             |
| Cervix                              | 3,936                      | 109,243       | 67                                                       | 1,224 (1,198–<br>1,250)               | 0.8 (0.7–0.8)                                                               | 311.0 (304.5–<br>317.6)                          | –             |
| Brain, other<br>nervous system      | 6,230                      | 138,616       | 85                                                       | 1,179 (1,151–<br>1,209)               | 0.7 (0.7–0.7)                                                               | 189.2 (184.7–<br>194.0)                          | –             |
| Uterine corpus                      | 8,769                      | 169,731       | 104                                                      | 1,074 (1,039–<br>1,110)               | 0.7 (0.6–0.7)                                                               | 122.5 (118.5–<br>126.6)                          | –             |
| Leukemia                            | 6,804                      | 129,392       | 79                                                       | 955 (931–980)                         | 0.6 (0.6–0.6)                                                               | 140.3 (136.9–<br>144.0)                          | –             |
| Liver, intrahepatic<br>bile duct    | 6,947                      | 130,930       | 80                                                       | 830 (803–857)                         | 0.5 (0.5–0.5)                                                               | 119.5 (115.6–<br>123.4)                          | –             |
| Lymphoma                            | 6,673                      | 115,671       | 71                                                       | 716 (695–738)                         | 0.4 (0.4–0.5)                                                               | 107.3 (104.2–<br>110.5)                          | –             |
| Stomach                             | 3,574                      | 73,189        | 45                                                       | 592 (578–608)                         | 0.4 (0.4–0.4)                                                               | 165.7 (161.6–<br>170.1)                          | –             |
| Melanoma (skin)                     | 2,428                      | 51,983        | 32                                                       | 440 (430–452)                         | 0.3 (0.3–0.3)                                                               | 181.3 (177.0–<br>186.0)                          | –             |
| Head & neck                         | 3,074                      | 60,628        | 37                                                       | 423 (410–436)                         | 0.3 (0.3–0.3)                                                               | 137.6 (133.5–<br>141.8)                          | –             |
| Kidney, renal<br>pelvis             | 3,794                      | 68,991        | 42                                                       | 417 (403–431)                         | 0.3 (0.2–0.3)                                                               | 109.8 (106.3–<br>113.5)                          | –             |
| Myeloma                             | 4,337                      | 71,720        | 44                                                       | 365 (352–380)                         | 0.2 (0.2–0.2)                                                               | 84.3 (81.2–<br>87.6)                             | –             |



| (eTable 3)<br>State, sex,<br>cancer | No. of<br>cancer<br>deaths | Total<br>PYLL | Age-std.<br>PYLL rate,<br>per 10 <sup>5</sup><br>persons | Total lost<br>earnings,<br>million \$ | Age-std. lost<br>earning rate,<br>million \$ per<br>10 <sup>5</sup> persons | Average lost<br>earnings,<br>\$1000 per<br>death | State<br>rank |
|-------------------------------------|----------------------------|---------------|----------------------------------------------------------|---------------------------------------|-----------------------------------------------------------------------------|--------------------------------------------------|---------------|
| Esophagus                           | 2,426                      | 44,987        | 28                                                       | 278 (269–287)                         | 0.2 (0.2–0.2)                                                               | 114.6 (110.8–118.5)                              | –             |
| Urinary Bladder                     | 3,005                      | 47,577        | 29                                                       | 236 (228–245)                         | 0.1 (0.1–0.2)                                                               | 78.6 (75.7–81.7)                                 | –             |
| <b>State-level<br/>results</b>      |                            |               |                                                          |                                       |                                                                             |                                                  |               |
| <b>All cancers<br/>(both sexes)</b> |                            |               |                                                          |                                       |                                                                             |                                                  |               |
| Alabama                             | 9,004                      | 161,678       | 2,711                                                    | 1,803 (1,750–1,858)                   | 31.8 (31.0–32.7)                                                            | 200.2 (194.4–206.4)                              | 8             |
| Alaska                              | 880                        | 16,662        | 2,283                                                    | 199 (193–204)                         | 24.9 (24.2–25.6)                                                            | 225.7 (219.6–232.1)                              | 27            |
| Arizona                             | 9,854                      | 169,696       | 2,082                                                    | 1,768 (1,716–1,823)                   | 23.6 (23.0–24.3)                                                            | 179.5 (174.1–184.9)                              | 38            |
| Arkansas                            | 5,812                      | 102,692       | 2,867                                                    | 1,119 (1,085–1,153)                   | 33.2 (32.3–34.1)                                                            | 192.5 (186.6–198.4)                              | 4             |
| California                          | 47,904                     | 862,942       | 2,047                                                    | 9,512 (9,258–9,782)                   | 22.4 (21.9–23.1)                                                            | 198.6 (193.3–204.2)                              | 45            |
| Colorado                            | 6,296                      | 112,051       | 1,862                                                    | 1,202 (1,168–1,239)                   | 19.7 (19.1–20.3)                                                            | 191.0 (185.6–196.8)                              | 50            |
| Connecticut                         | 5,237                      | 90,597        | 2,059                                                    | 944 (916–972)                         | 21.8 (21.2–22.4)                                                            | 180.2 (175.0–185.7)                              | 48            |
| Delaware                            | 1,669                      | 28,772        | 2,424                                                    | 286 (277–295)                         | 25.6 (24.9–26.3)                                                            | 171.2 (165.9–176.8)                              | 24            |
| District of<br>Columbia             | 891                        | 17,005        | 2,589                                                    | 190 (185–196)                         | 27.9 (27.2–28.7)                                                            | 213.8 (208.1–219.9)                              | 14            |
| Florida                             | 35,806                     | 618,754       | 2,287                                                    | 6,491 (6,294–6,694)                   | 26.7 (26.0–27.4)                                                            | 181.3 (175.8–187.0)                              | 19            |
| Georgia                             | 14,745                     | 271,241       | 2,428                                                    | 3,064 (2,978–3,153)                   | 27.1 (26.4–27.9)                                                            | 207.8 (201.9–213.8)                              | 17            |
| Hawaii                              | 1,960                      | 34,837        | 2,030                                                    | 373 (362–384)                         | 23.0 (22.4–23.6)                                                            | 190.2 (184.7–195.9)                              | 42            |
| Idaho                               | 2,333                      | 39,919        | 2,111                                                    | 410 (397–423)                         | 22.6 (22.0–23.3)                                                            | 175.6 (170.0–181.3)                              | 44            |
| Illinois                            | 20,220                     | 360,575       | 2,444                                                    | 3,902 (3,792–4,018)                   | 26.7 (26.0–27.4)                                                            | 193.0 (187.5–198.7)                              | 18            |
| Indiana                             | 11,349                     | 203,601       | 2,646                                                    | 2,243 (2,178–2,310)                   | 29.9 (29.1–30.7)                                                            | 197.6 (191.9–203.5)                              | 9             |
| Iowa                                | 5,218                      | 89,355        | 2,376                                                    | 939 (911–969)                         | 26.1 (25.4–26.9)                                                            | 180.0 (174.6–185.6)                              | 23            |
| Kansas                              | 4,518                      | 78,994        | 2,389                                                    | 839 (814–865)                         | 26.2 (25.4–26.9)                                                            | 185.7 (180.2–191.4)                              | 22            |
| Kentucky                            | 8,959                      | 162,618       | 3,037                                                    | 1,822 (1,770–1,877)                   | 35.3 (34.4–36.3)                                                            | 203.4 (197.5–209.4)                              | 1             |
| Louisiana                           | 8,185                      | 150,001       | 2,790                                                    | 1,703 (1,654–1,754)                   | 32.2 (31.4–33.1)                                                            | 208.1 (202.1–214.3)                              | 6             |
| Maine                               | 2,776                      | 46,924        | 2,489                                                    | 464 (450–479)                         | 26.3 (25.5–27.0)                                                            | 167.2 (162.0–172.6)                              | 20            |
| Maryland                            | 8,764                      | 157,627       | 2,257                                                    | 1,698 (1,650–1,748)                   | 24.3 (23.6–25.0)                                                            | 193.7 (188.3–199.5)                              | 33            |

| <b>(eTable 3)</b><br><b>State, sex,</b><br><b>cancer</b> | <b>No. of</b><br><b>cancer</b><br><b>deaths</b> | <b>Total</b><br><b>PYLL</b> | <b>Age-std.</b><br><b>PYLL rate,</b><br><b>per 10<sup>5</sup></b><br><b>persons</b> | <b>Total lost</b><br><b>earnings,</b><br><b>million \$</b> | <b>Age-std. lost</b><br><b>earning rate,</b><br><b>million \$ per</b><br><b>10<sup>5</sup> persons</b> | <b>Average lost</b><br><b>earnings,</b><br><b>\$1000 per</b><br><b>death</b> | <b>State</b><br><b>rank</b> |
|----------------------------------------------------------|-------------------------------------------------|-----------------------------|-------------------------------------------------------------------------------------|------------------------------------------------------------|--------------------------------------------------------------------------------------------------------|------------------------------------------------------------------------------|-----------------------------|
| Massachusetts                                            | 10,014                                          | 172,662                     | 2,127                                                                               | 1,762 (1,711–1,816)                                        | 22.1 (21.5–22.7)                                                                                       | 176.0 (170.9–181.3)                                                          | 47                          |
| Michigan                                                 | 17,165                                          | 305,145                     | 2,498                                                                               | 3,286 (3,193–3,385)                                        | 28.2 (27.5–29.0)                                                                                       | 191.4 (186.0–197.2)                                                          | 13                          |
| Minnesota                                                | 7,881                                           | 137,581                     | 2,155                                                                               | 1,468 (1,427–1,512)                                        | 23.5 (22.9–24.2)                                                                                       | 186.3 (181.0–191.9)                                                          | 39                          |
| Mississippi                                              | 5,586                                           | 102,010                     | 2,911                                                                               | 1,155 (1,122–1,190)                                        | 34.3 (33.4–35.2)                                                                                       | 206.8 (200.8–213.1)                                                          | 2                           |
| Missouri                                                 | 10,872                                          | 193,074                     | 2,610                                                                               | 2,076 (2,016–2,139)                                        | 29.3 (28.6–30.1)                                                                                       | 191.0 (185.4–196.8)                                                          | 12                          |
| Montana                                                  | 1,743                                           | 30,538                      | 2,307                                                                               | 321 (312–331)                                              | 26.2 (25.5–26.9)                                                                                       | 184.3 (178.9–190.1)                                                          | 21                          |
| Nebraska                                                 | 2,783                                           | 48,078                      | 2,243                                                                               | 505 (491–521)                                              | 24.4 (23.7–25.1)                                                                                       | 181.6 (176.4–187.1)                                                          | 31                          |
| Nevada                                                   | 4,301                                           | 75,459                      | 2,214                                                                               | 784 (761–808)                                              | 23.6 (23.0–24.3)                                                                                       | 182.4 (177.0–187.9)                                                          | 37                          |
| New Hampshire                                            | 2,295                                           | 40,182                      | 2,334                                                                               | 418 (406–430)                                              | 25.2 (24.5–25.9)                                                                                       | 182.0 (176.7–187.6)                                                          | 25                          |
| New Jersey                                               | 12,946                                          | 225,916                     | 2,122                                                                               | 2,349 (2,284–2,419)                                        | 22.3 (21.7–22.9)                                                                                       | 181.5 (176.4–186.9)                                                          | 46                          |
| New Mexico                                               | 3,039                                           | 53,323                      | 2,144                                                                               | 552 (536–569)                                              | 23.7 (23.1–24.4)                                                                                       | 181.7 (176.4–187.2)                                                          | 36                          |
| New York                                                 | 28,057                                          | 496,683                     | 2,146                                                                               | 5,279 (5,134–5,433)                                        | 23.3 (22.7–24.0)                                                                                       | 188.2 (183.0–193.6)                                                          | 40                          |
| North Carolina                                           | 16,455                                          | 292,368                     | 2,437                                                                               | 3,163 (3,071–3,259)                                        | 27.2 (26.5–28.0)                                                                                       | 192.2 (186.6–198.1)                                                          | 15                          |
| North Dakota                                             | 1,069                                           | 18,253                      | 2,192                                                                               | 192 (186–198)                                              | 23.3 (22.6–24.0)                                                                                       | 179.6 (174.2–185.3)                                                          | 41                          |
| Ohio                                                     | 21,087                                          | 374,323                     | 2,623                                                                               | 4,040 (3,924–4,161)                                        | 29.6 (28.8–30.4)                                                                                       | 191.6 (186.1–197.4)                                                          | 11                          |
| Oklahoma                                                 | 7,065                                           | 126,107                     | 2,797                                                                               | 1,386 (1,346–1,428)                                        | 32.2 (31.4–33.1)                                                                                       | 196.2 (190.5–202.1)                                                          | 7                           |
| Oregon                                                   | 6,608                                           | 113,950                     | 2,264                                                                               | 1,147 (1,112–1,184)                                        | 24.1 (23.4–24.8)                                                                                       | 173.6 (168.3–179.1)                                                          | 34                          |
| Pennsylvania                                             | 22,859                                          | 396,236                     | 2,439                                                                               | 4,165 (4,044–4,293)                                        | 27.1 (26.4–27.9)                                                                                       | 182.2 (176.9–187.8)                                                          | 16                          |
| Rhode Island                                             | 1,738                                           | 29,879                      | 2,290                                                                               | 312 (303–322)                                              | 24.4 (23.7–25.1)                                                                                       | 179.7 (174.4–185.2)                                                          | 32                          |
| South Carolina                                           | 8,595                                           | 154,403                     | 2,535                                                                               | 1,695 (1,645–1,747)                                        | 29.6 (28.9–30.4)                                                                                       | 197.2 (191.4–203.2)                                                          | 10                          |
| South Dakota                                             | 1,294                                           | 22,296                      | 2,206                                                                               | 235 (228–242)                                              | 23.9 (23.3–24.7)                                                                                       | 181.7 (176.3–187.4)                                                          | 35                          |
| Tennessee                                                | 12,347                                          | 223,825                     | 2,795                                                                               | 2,483 (2,412–2,559)                                        | 32.3 (31.5–33.2)                                                                                       | 201.1 (195.3–207.2)                                                          | 5                           |
| Texas                                                    | 33,416                                          | 617,127                     | 2,219                                                                               | 7,068 (6,877–7,268)                                        | 24.8 (24.2–25.5)                                                                                       | 211.5 (205.8–217.5)                                                          | 28                          |
| Utah                                                     | 2,524                                           | 46,059                      | 1,758                                                                               | 529 (516–544)                                              | 19.6 (19.1–20.2)                                                                                       | 209.7 (204.4–215.4)                                                          | 51                          |
| Vermont                                                  | 1,167                                           | 19,945                      | 2,343                                                                               | 202 (196–209)                                              | 24.6 (23.9–25.4)                                                                                       | 173.5 (168.1–179.1)                                                          | 29                          |

| <b>(eTable 3)</b><br><b>State, sex,</b><br><b>cancer</b> | <b>No. of</b><br><b>cancer</b><br><b>deaths</b> | <b>Total</b><br><b>PYLL</b> | <b>Age-std.</b><br><b>PYLL rate,</b><br><b>per 10<sup>5</sup></b><br><b>persons</b> | <b>Total lost</b><br><b>earnings,</b><br><b>million \$</b> | <b>Age-std. lost</b><br><b>earning rate,</b><br><b>million \$ per</b><br><b>10<sup>5</sup> persons</b> | <b>Average lost</b><br><b>earnings,</b><br><b>\$1000 per</b><br><b>death</b> | <b>State</b><br><b>rank</b> |
|----------------------------------------------------------|-------------------------------------------------|-----------------------------|-------------------------------------------------------------------------------------|------------------------------------------------------------|--------------------------------------------------------------------------------------------------------|------------------------------------------------------------------------------|-----------------------------|
| Virginia                                                 | 12,456                                          | 222,578                     | 2,287                                                                               | 2,413 (2,344–2,485)                                        | 25.0 (24.3–25.7)                                                                                       | 193.7 (188.2–199.6)                                                          | 26                          |
| Washington                                               | 10,366                                          | 181,258                     | 2,171                                                                               | 1,890 (1,834–1,949)                                        | 22.7 (22.1–23.4)                                                                                       | 182.3 (176.9–188.1)                                                          | 43                          |
| West Virginia                                            | 4,116                                           | 72,704                      | 2,899                                                                               | 777 (754–802)                                              | 33.7 (32.9–34.7)                                                                                       | 188.9 (183.1–194.8)                                                          | 3                           |
| Wisconsin                                                | 9,157                                           | 158,098                     | 2,250                                                                               | 1,668 (1,619–1,720)                                        | 24.5 (23.8–25.2)                                                                                       | 182.2 (176.8–187.9)                                                          | 30                          |
| Wyoming                                                  | 765                                             | 13,338                      | 1,910                                                                               | 139 (135–143)                                              | 20.0 (19.4–20.6)                                                                                       | 181.8 (176.3–187.4)                                                          | 49                          |
| <b>United States</b>                                     | <b>492,146</b>                                  | <b>8,739,939</b>            | <b>2,325</b>                                                                        | <b>94,435 (91,748–97,261)</b>                              | <b>25.8 (25.2–26.6)</b>                                                                                | <b>191.9 (186.4–197.6)</b>                                                   | –                           |
| <b>All cancers</b><br><b>(men)</b>                       |                                                 |                             |                                                                                     |                                                            |                                                                                                        |                                                                              |                             |
| Alabama                                                  | 5,115                                           | 85,346                      | 3,044                                                                               | 1,269 (1,220–1,322)                                        | 46.0 (44.3–47.8)                                                                                       | 248.1 (238.5–258.5)                                                          | 6                           |
| Alaska                                                   | 472                                             | 8,542                       | 2,306                                                                               | 144 (139–149)                                              | 34.9 (33.6–36.2)                                                                                       | 305.0 (294.8–316.0)                                                          | 26                          |
| Arizona                                                  | 5,337                                           | 85,585                      | 2,176                                                                               | 1,226 (1,177–1,278)                                        | 33.1 (32.0–34.4)                                                                                       | 229.6 (220.5–239.4)                                                          | 33                          |
| Arkansas                                                 | 3,313                                           | 54,186                      | 3,125                                                                               | 777 (746–812)                                              | 46.2 (44.5–48.1)                                                                                       | 234.6 (225.1–244.9)                                                          | 5                           |
| California                                               | 25,244                                          | 420,667                     | 2,098                                                                               | 6,367 (6,135–6,622)                                        | 30.5 (29.4–31.8)                                                                                       | 252.2 (243.1–262.3)                                                          | 47                          |
| Colorado                                                 | 3,354                                           | 55,745                      | 1,912                                                                               | 824 (792–859)                                              | 27.1 (26.0–28.2)                                                                                       | 245.7 (236.2–256.0)                                                          | 50                          |
| Connecticut                                              | 2,747                                           | 44,664                      | 2,148                                                                               | 647 (622–675)                                              | 30.6 (29.4–31.9)                                                                                       | 235.5 (226.3–245.6)                                                          | 45                          |
| Delaware                                                 | 884                                             | 13,719                      | 2,387                                                                               | 184 (176–193)                                              | 32.6 (31.2–34.0)                                                                                       | 208.5 (199.4–218.3)                                                          | 37                          |
| District of Columbia                                     | 437                                             | 7,726                       | 2,550                                                                               | 122 (117–127)                                              | 37.2 (35.8–38.8)                                                                                       | 278.8 (268.5–289.8)                                                          | 18                          |
| Florida                                                  | 19,796                                          | 317,301                     | 2,442                                                                               | 4,489 (4,307–4,687)                                        | 37.4 (36.1–38.8)                                                                                       | 226.8 (217.6–236.8)                                                          | 17                          |
| Georgia                                                  | 8,048                                           | 136,930                     | 2,634                                                                               | 2,086 (2,008–2,172)                                        | 38.4 (36.9–40.0)                                                                                       | 259.2 (249.4–269.8)                                                          | 15                          |
| Hawaii                                                   | 1,056                                           | 17,416                      | 2,087                                                                               | 254 (244–265)                                              | 31.2 (30.1–32.5)                                                                                       | 240.6 (231.1–250.8)                                                          | 42                          |
| Idaho                                                    | 1,304                                           | 20,551                      | 2,196                                                                               | 283 (271–296)                                              | 30.9 (29.6–32.2)                                                                                       | 216.9 (207.8–226.7)                                                          | 44                          |
| Illinois                                                 | 10,714                                          | 178,215                     | 2,559                                                                               | 2,656 (2,555–2,766)                                        | 37.1 (35.7–38.7)                                                                                       | 247.9 (238.5–258.2)                                                          | 20                          |
| Indiana                                                  | 6,192                                           | 103,864                     | 2,829                                                                               | 1,561 (1,502–1,626)                                        | 42.1 (40.6–43.8)                                                                                       | 252.1 (242.6–262.7)                                                          | 10                          |
| Iowa                                                     | 2,854                                           | 45,874                      | 2,534                                                                               | 663 (637–691)                                              | 37.2 (35.8–38.7)                                                                                       | 232.2 (223.1–242.1)                                                          | 19                          |
| Kansas                                                   | 2,447                                           | 40,123                      | 2,518                                                                               | 585 (562–610)                                              | 36.7 (35.3–38.3)                                                                                       | 239.2 (229.8–249.4)                                                          | 21                          |
| Kentucky                                                 | 4,942                                           | 84,291                      | 3,291                                                                               | 1,282 (1,234–1,335)                                        | 50.3 (48.5–52.3)                                                                                       | 259.4 (249.6–270.2)                                                          | 1                           |

| <b>(eTable 3)<br/>State, sex,<br/>cancer</b> | <b>No. of<br/>cancer<br/>deaths</b> | <b>Total<br/>PYLL</b> | <b>Age-std.<br/>PYLL rate,<br/>per 10<sup>5</sup><br/>persons</b> | <b>Total lost<br/>earnings,<br/>million \$</b> | <b>Age-std. lost<br/>earning rate,<br/>million \$ per<br/>10<sup>5</sup> persons</b> | <b>Average lost<br/>earnings,<br/>\$1000 per<br/>death</b> | <b>State<br/>rank</b> |
|----------------------------------------------|-------------------------------------|-----------------------|-------------------------------------------------------------------|------------------------------------------------|--------------------------------------------------------------------------------------|------------------------------------------------------------|-----------------------|
| Louisiana                                    | 4,564                               | 78,078                | 3,053                                                             | 1,187 (1,142–1,237)                            | 45.7 (44.0–47.5)                                                                     | 260.2 (250.2–271.0)                                        | 8                     |
| Maine                                        | 1,457                               | 22,985                | 2,549                                                             | 319 (305–333)                                  | 36.7 (35.3–38.2)                                                                     | 218.7 (209.6–228.6)                                        | 22                    |
| Maryland                                     | 4,563                               | 75,917                | 2,345                                                             | 1,129 (1,085–1,175)                            | 33.7 (32.4–35.1)                                                                     | 247.3 (237.9–257.6)                                        | 32                    |
| Massachusetts                                | 5,147                               | 82,129                | 2,174                                                             | 1,171 (1,124–1,221)                            | 30.4 (29.2–31.7)                                                                     | 227.4 (218.3–237.3)                                        | 48                    |
| Michigan                                     | 9,136                               | 151,779               | 2,602                                                             | 2,258 (2,172–2,352)                            | 39.3 (37.9–40.9)                                                                     | 247.2 (237.7–257.5)                                        | 13                    |
| Minnesota                                    | 4,190                               | 68,966                | 2,234                                                             | 1,022 (983–1,064)                              | 32.8 (31.6–34.1)                                                                     | 243.9 (234.6–254.0)                                        | 35                    |
| Mississippi                                  | 3,171                               | 53,768                | 3,285                                                             | 811 (780–845)                                  | 49.8 (48.0–51.7)                                                                     | 255.8 (246.1–266.5)                                        | 2                     |
| Missouri                                     | 5,833                               | 96,680                | 2,736                                                             | 1,426 (1,370–1,486)                            | 40.9 (39.3–42.5)                                                                     | 244.4 (234.9–254.8)                                        | 12                    |
| Montana                                      | 951                                 | 15,551                | 2,385                                                             | 225 (216–235)                                  | 36.7 (35.4–38.1)                                                                     | 236.5 (227.2–246.7)                                        | 23                    |
| Nebraska                                     | 1,493                               | 24,100                | 2,338                                                             | 349 (336–364)                                  | 33.8 (32.6–35.2)                                                                     | 233.9 (224.7–243.8)                                        | 31                    |
| Nevada                                       | 2,295                               | 37,354                | 2,243                                                             | 536 (515–559)                                  | 32.5 (31.2–33.8)                                                                     | 233.7 (224.3–243.8)                                        | 38                    |
| New Hampshire                                | 1,216                               | 19,656                | 2,360                                                             | 283 (271–295)                                  | 34.3 (33.0–35.7)                                                                     | 232.3 (223.0–242.4)                                        | 29                    |
| New Jersey                                   | 6,598                               | 107,147               | 2,166                                                             | 1,562 (1,501–1,627)                            | 30.6 (29.4–31.9)                                                                     | 236.7 (227.5–246.6)                                        | 46                    |
| New Mexico                                   | 1,615                               | 25,752                | 2,139                                                             | 363 (348–379)                                  | 31.2 (30.1–32.5)                                                                     | 225.0 (215.8–234.9)                                        | 41                    |
| New York                                     | 14,327                              | 236,061               | 2,197                                                             | 3,524 (3,392–3,669)                            | 32.2 (31.0–33.6)                                                                     | 246.0 (236.8–256.0)                                        | 39                    |
| North Carolina                               | 8,984                               | 149,048               | 2,656                                                             | 2,199 (2,113–2,292)                            | 39.2 (37.7–40.8)                                                                     | 244.7 (235.2–255.1)                                        | 14                    |
| North Dakota                                 | 592                                 | 9,418                 | 2,299                                                             | 132 (127–138)                                  | 31.6 (30.3–33.0)                                                                     | 223.6 (214.5–233.4)                                        | 40                    |
| Ohio                                         | 11,268                              | 186,536               | 2,758                                                             | 2,767 (2,661–2,882)                            | 41.2 (39.7–42.9)                                                                     | 245.6 (236.1–255.8)                                        | 11                    |
| Oklahoma                                     | 3,918                               | 65,556                | 3,044                                                             | 980 (942–1,020)                                | 46.2 (44.5–48.0)                                                                     | 250.0 (240.5–260.4)                                        | 4                     |
| Oregon                                       | 3,506                               | 56,083                | 2,309                                                             | 780 (747–815)                                  | 33.0 (31.7–34.4)                                                                     | 222.4 (213.1–232.4)                                        | 34                    |
| Pennsylvania                                 | 12,232                              | 198,406               | 2,574                                                             | 2,875 (2,762–2,999)                            | 38.0 (36.6–39.5)                                                                     | 235.1 (225.8–245.1)                                        | 16                    |
| Rhode Island                                 | 939                                 | 15,120                | 2,525                                                             | 219 (210–228)                                  | 36.5 (35.1–37.9)                                                                     | 233.0 (223.9–242.9)                                        | 24                    |
| South Carolina                               | 4,805                               | 80,234                | 2,785                                                             | 1,184 (1,138–1,234)                            | 42.5 (41.0–44.2)                                                                     | 246.4 (236.8–256.9)                                        | 9                     |
| South Dakota                                 | 725                                 | 11,485                | 2,307                                                             | 162 (155–169)                                  | 32.8 (31.5–34.2)                                                                     | 223.4 (214.4–233.2)                                        | 36                    |
| Tennessee                                    | 6,830                               | 115,430               | 3,024                                                             | 1,723 (1,657–1,796)                            | 45.7 (44.0–47.5)                                                                     | 252.3 (242.6–263.0)                                        | 7                     |

| <b>(eTable 3)</b><br><b>State, sex,</b><br><b>cancer</b> | <b>No. of</b><br><b>cancer</b><br><b>deaths</b> | <b>Total</b><br><b>PYLL</b> | <b>Age-std.</b><br><b>PYLL rate,</b><br><b>per 10<sup>5</sup></b><br><b>persons</b> | <b>Total lost</b><br><b>earnings,</b><br><b>million \$</b> | <b>Age-std. lost</b><br><b>earning rate,</b><br><b>million \$ per</b><br><b>10<sup>5</sup> persons</b> | <b>Average lost</b><br><b>earnings,</b><br><b>\$1000 per</b><br><b>death</b> | <b>State</b><br><b>rank</b> |
|----------------------------------------------------------|-------------------------------------------------|-----------------------------|-------------------------------------------------------------------------------------|------------------------------------------------------------|--------------------------------------------------------------------------------------------------------|------------------------------------------------------------------------------|-----------------------------|
| Texas                                                    | 18,191                                          | 311,558                     | 2,354                                                                               | 4,806 (4,631–5,000)                                        | 34.4 (33.1–35.9)                                                                                       | 264.2 (254.6–274.8)                                                          | 28                          |
| Utah                                                     | 1,364                                           | 22,926                      | 1,804                                                                               | 358 (345–372)                                              | 26.7 (25.7–27.7)                                                                                       | 262.4 (253.2–272.5)                                                          | 51                          |
| Vermont                                                  | 628                                             | 10,122                      | 2,445                                                                               | 142 (136–148)                                              | 35.2 (33.9–36.7)                                                                                       | 226.1 (216.6–236.2)                                                          | 25                          |
| Virginia                                                 | 6,695                                           | 111,076                     | 2,414                                                                               | 1,644 (1,581–1,713)                                        | 34.8 (33.5–36.3)                                                                                       | 245.6 (236.1–255.9)                                                          | 27                          |
| Washington                                               | 5,591                                           | 90,558                      | 2,233                                                                               | 1,286 (1,234–1,343)                                        | 31.0 (29.7–32.3)                                                                                       | 230.0 (220.6–240.1)                                                          | 43                          |
| West Virginia                                            | 2,281                                           | 37,836                      | 3,101                                                                               | 550 (528–574)                                              | 47.6 (45.9–49.5)                                                                                       | 241.0 (231.4–251.5)                                                          | 3                           |
| Wisconsin                                                | 5,003                                           | 80,569                      | 2,357                                                                               | 1,162 (1,116–1,212)                                        | 34.0 (32.7–35.3)                                                                                       | 232.3 (223.1–242.3)                                                          | 30                          |
| Wyoming                                                  | 412                                             | 6,806                       | 1,996                                                                               | 100 (96–104)                                               | 29.8 (28.7–30.9)                                                                                       | 241.9 (232.5–252.1)                                                          | 49                          |
| <b>United States</b>                                     | <b>264,776</b>                                  | <b>4,375,435</b>            | <b>2,446</b>                                                                        | <b>64,652 (62,161–67,369)</b>                              | <b>36.0 (34.6–37.5)</b>                                                                                | <b>244.2 (234.8–254.4)</b>                                                   | –                           |
| <b>All cancers (women)</b>                               |                                                 |                             |                                                                                     |                                                            |                                                                                                        |                                                                              |                             |
| Alabama                                                  | 3,889                                           | 76,332                      | 2,443                                                                               | 534 (519–550)                                              | 19.0 (18.6–19.6)                                                                                       | 137.3 (133.4–141.4)                                                          | 9                           |
| Alaska                                                   | 408                                             | 8,120                       | 2,250                                                                               | 55 (53–56)                                                 | 13.9 (13.4–14.3)                                                                                       | 133.8 (129.6–138.2)                                                          | 47                          |
| Arizona                                                  | 4,517                                           | 84,111                      | 2,002                                                                               | 542 (526–559)                                              | 14.7 (14.3–15.1)                                                                                       | 120.0 (116.4–123.7)                                                          | 42                          |
| Arkansas                                                 | 2,499                                           | 48,505                      | 2,656                                                                               | 341 (331–351)                                              | 21.2 (20.7–21.8)                                                                                       | 136.5 (132.6–140.5)                                                          | 2                           |
| California                                               | 22,660                                          | 442,275                     | 2,016                                                                               | 3,143 (3,056–3,235)                                        | 15.0 (14.6–15.4)                                                                                       | 138.7 (134.9–142.8)                                                          | 40                          |
| Colorado                                                 | 2,942                                           | 56,306                      | 1,825                                                                               | 378 (367–390)                                              | 12.6 (12.3–13.0)                                                                                       | 128.5 (124.7–132.4)                                                          | 49                          |
| Connecticut                                              | 2,490                                           | 45,933                      | 1,990                                                                               | 296 (287–306)                                              | 13.8 (13.5–14.2)                                                                                       | 119.0 (115.4–122.7)                                                          | 48                          |
| Delaware                                                 | 785                                             | 15,053                      | 2,374                                                                               | 101 (98–104)                                               | 17.9 (17.5–18.4)                                                                                       | 129.1 (125.2–133.1)                                                          | 14                          |
| District of Columbia                                     | 454                                             | 9,279                       | 2,636                                                                               | 69 (67–71)                                                 | 19.7 (19.2–20.3)                                                                                       | 151.2 (146.9–155.6)                                                          | 7                           |
| Florida                                                  | 16,010                                          | 301,453                     | 2,161                                                                               | 2,000 (1,940–2,061)                                        | 16.9 (16.5–17.4)                                                                                       | 124.9 (121.2–128.7)                                                          | 19                          |
| Georgia                                                  | 6,697                                           | 134,311                     | 2,270                                                                               | 977 (950–1,006)                                            | 17.1 (16.6–17.5)                                                                                       | 145.9 (141.8–150.2)                                                          | 18                          |
| Hawaii                                                   | 904                                             | 17,421                      | 1,992                                                                               | 119 (115–122)                                              | 15.1 (14.7–15.5)                                                                                       | 131.3 (127.4–135.3)                                                          | 38                          |
| Idaho                                                    | 1,029                                           | 19,368                      | 2,039                                                                               | 127 (123–131)                                              | 14.6 (14.2–15.0)                                                                                       | 123.1 (119.4–126.9)                                                          | 44                          |
| Illinois                                                 | 9,506                                           | 182,360                     | 2,361                                                                               | 1,245 (1,209–1,283)                                        | 17.1 (16.7–17.6)                                                                                       | 131.0 (127.1–134.9)                                                          | 16                          |
| Indiana                                                  | 5,157                                           | 99,737                      | 2,500                                                                               | 681 (661–701)                                              | 18.5 (18.0–19.1)                                                                                       | 132.0 (128.1–135.9)                                                          | 12                          |

| <b>(eTable 3)</b><br><b>State, sex,</b><br><b>cancer</b> | <b>No. of</b><br><b>cancer</b><br><b>deaths</b> | <b>Total</b><br><b>PYLL</b> | <b>Age-std.</b><br><b>PYLL rate,</b><br><b>per 10<sup>5</sup></b><br><b>persons</b> | <b>Total lost</b><br><b>earnings,</b><br><b>million \$</b> | <b>Age-std. lost</b><br><b>earning rate,</b><br><b>million \$ per</b><br><b>10<sup>5</sup> persons</b> | <b>Average lost</b><br><b>earnings,</b><br><b>\$1000 per</b><br><b>death</b> | <b>State</b><br><b>rank</b> |
|----------------------------------------------------------|-------------------------------------------------|-----------------------------|-------------------------------------------------------------------------------------|------------------------------------------------------------|--------------------------------------------------------------------------------------------------------|------------------------------------------------------------------------------|-----------------------------|
| Iowa                                                     | 2,364                                           | 43,481                      | 2,270                                                                               | 276 (268–285)                                              | 16.2 (15.7–16.6)                                                                                       | 116.9 (113.3–120.6)                                                          | 25                          |
| Kansas                                                   | 2,071                                           | 38,872                      | 2,282                                                                               | 253 (246–261)                                              | 16.2 (15.7–16.6)                                                                                       | 122.4 (118.6–126.1)                                                          | 26                          |
| Kentucky                                                 | 4,017                                           | 78,327                      | 2,828                                                                               | 540 (524–556)                                              | 21.4 (20.8–22.0)                                                                                       | 134.4 (130.4–138.4)                                                          | 1                           |
| Louisiana                                                | 3,621                                           | 71,923                      | 2,582                                                                               | 515 (501–531)                                              | 20.1 (19.6–20.6)                                                                                       | 142.3 (138.2–146.6)                                                          | 6                           |
| Maine                                                    | 1,319                                           | 23,940                      | 2,443                                                                               | 145 (140–150)                                              | 16.8 (16.3–17.3)                                                                                       | 110.0 (106.4–113.8)                                                          | 21                          |
| Maryland                                                 | 4,201                                           | 81,710                      | 2,197                                                                               | 569 (552–586)                                              | 16.0 (15.6–16.5)                                                                                       | 135.4 (131.4–139.4)                                                          | 27                          |
| Massachusetts                                            | 4,867                                           | 90,533                      | 2,101                                                                               | 591 (573–609)                                              | 14.7 (14.3–15.1)                                                                                       | 121.4 (117.8–125.1)                                                          | 43                          |
| Michigan                                                 | 8,029                                           | 153,367                     | 2,416                                                                               | 1,027 (996–1,058)                                          | 17.8 (17.4–18.3)                                                                                       | 127.9 (124.1–131.8)                                                          | 15                          |
| Minnesota                                                | 3,691                                           | 68,615                      | 2,089                                                                               | 446 (432–460)                                              | 14.5 (14.1–14.9)                                                                                       | 120.8 (117.1–124.5)                                                          | 45                          |
| Mississippi                                              | 2,415                                           | 48,241                      | 2,610                                                                               | 344 (334–354)                                              | 20.4 (19.9–21.0)                                                                                       | 142.4 (138.3–146.6)                                                          | 4                           |
| Missouri                                                 | 5,039                                           | 96,394                      | 2,513                                                                               | 650 (631–670)                                              | 18.7 (18.2–19.2)                                                                                       | 129.0 (125.1–133.0)                                                          | 11                          |
| Montana                                                  | 792                                             | 14,987                      | 2,257                                                                               | 96 (93–99)                                                 | 16.4 (16.0–16.9)                                                                                       | 121.6 (117.8–125.4)                                                          | 24                          |
| Nebraska                                                 | 1,290                                           | 23,979                      | 2,170                                                                               | 156 (151–161)                                              | 15.3 (14.9–15.8)                                                                                       | 121.1 (117.3–124.8)                                                          | 37                          |
| Nevada                                                   | 2,006                                           | 38,105                      | 2,209                                                                               | 248 (240–256)                                              | 15.4 (15.0–15.9)                                                                                       | 123.6 (119.9–127.4)                                                          | 35                          |
| New Hampshire                                            | 1,079                                           | 20,526                      | 2,323                                                                               | 135 (131–139)                                              | 16.6 (16.2–17.1)                                                                                       | 125.2 (121.4–129.1)                                                          | 22                          |
| New Jersey                                               | 6,348                                           | 118,769                     | 2,101                                                                               | 787 (764–811)                                              | 14.9 (14.5–15.3)                                                                                       | 124.0 (120.3–127.8)                                                          | 41                          |
| New Mexico                                               | 1,424                                           | 27,571                      | 2,166                                                                               | 189 (183–194)                                              | 16.8 (16.4–17.3)                                                                                       | 132.5 (128.6–136.4)                                                          | 20                          |
| New York                                                 | 13,730                                          | 260,622                     | 2,116                                                                               | 1,753 (1,702–1,806)                                        | 15.4 (14.9–15.8)                                                                                       | 127.7 (123.9–131.6)                                                          | 36                          |
| North Carolina                                           | 7,471                                           | 143,320                     | 2,262                                                                               | 964 (935–993)                                              | 16.6 (16.1–17.0)                                                                                       | 129.1 (125.2–132.9)                                                          | 23                          |
| North Dakota                                             | 477                                             | 8,834                       | 2,145                                                                               | 60 (58–61)                                                 | 15.8 (15.3–16.2)                                                                                       | 124.9 (121.4–128.6)                                                          | 31                          |
| Ohio                                                     | 9,819                                           | 187,786                     | 2,522                                                                               | 1,272 (1,234–1,311)                                        | 18.9 (18.4–19.4)                                                                                       | 129.5 (125.7–133.5)                                                          | 10                          |
| Oklahoma                                                 | 3,147                                           | 60,551                      | 2,594                                                                               | 407 (394–419)                                              | 19.2 (18.7–19.8)                                                                                       | 129.2 (125.3–133.1)                                                          | 8                           |
| Oregon                                                   | 3,102                                           | 57,866                      | 2,233                                                                               | 367 (355–378)                                              | 15.7 (15.2–16.1)                                                                                       | 118.2 (114.6–122.0)                                                          | 33                          |
| Pennsylvania                                             | 10,627                                          | 197,830                     | 2,335                                                                               | 1,289 (1,250–1,329)                                        | 17.1 (16.7–17.6)                                                                                       | 121.3 (117.6–125.1)                                                          | 17                          |
| Rhode Island                                             | 799                                             | 14,758                      | 2,131                                                                               | 93 (90–96)                                                 | 14.4 (14.0–14.8)                                                                                       | 116.8 (113.2–120.6)                                                          | 46                          |

| <b>(eTable 3)</b><br><b>State, sex,</b><br><b>cancer</b> | <b>No. of</b><br><b>cancer</b><br><b>deaths</b> | <b>Total</b><br><b>PYLL</b> | <b>Age-std.</b><br><b>PYLL rate,</b><br><b>per 10<sup>5</sup></b><br><b>persons</b> | <b>Total lost</b><br><b>earnings,</b><br><b>million \$</b> | <b>Age-std. lost</b><br><b>earning rate,</b><br><b>million \$ per</b><br><b>10<sup>5</sup> persons</b> | <b>Average lost</b><br><b>earnings,</b><br><b>\$1000 per</b><br><b>death</b> | <b>State</b><br><b>rank</b> |
|----------------------------------------------------------|-------------------------------------------------|-----------------------------|-------------------------------------------------------------------------------------|------------------------------------------------------------|--------------------------------------------------------------------------------------------------------|------------------------------------------------------------------------------|-----------------------------|
| South Carolina                                           | 3,790                                           | 74,169                      | 2,329                                                                               | 511 (496–526)                                              | 18.1 (17.6–18.6)                                                                                       | 134.8 (130.9–138.9)                                                          | 13                          |
| South Dakota                                             | 569                                             | 10,811                      | 2,136                                                                               | 73 (71–75)                                                 | 15.8 (15.3–16.2)                                                                                       | 128.4 (124.6–132.3)                                                          | 32                          |
| Tennessee                                                | 5,517                                           | 108,395                     | 2,610                                                                               | 760 (738–782)                                              | 20.1 (19.6–20.7)                                                                                       | 137.7 (133.8–141.8)                                                          | 5                           |
| Texas                                                    | 15,225                                          | 305,569                     | 2,114                                                                               | 2,260 (2,198–2,325)                                        | 15.9 (15.5–16.4)                                                                                       | 148.4 (144.4–152.7)                                                          | 28                          |
| Utah                                                     | 1,160                                           | 23,133                      | 1,707                                                                               | 171 (167–176)                                              | 12.6 (12.2–12.9)                                                                                       | 147.6 (143.7–151.8)                                                          | 50                          |
| Vermont                                                  | 539                                             | 9,823                       | 2,296                                                                               | 60 (58–62)                                                 | 15.8 (15.4–16.3)                                                                                       | 112.1 (108.5–115.8)                                                          | 30                          |
| Virginia                                                 | 5,761                                           | 111,502                     | 2,189                                                                               | 768 (746–792)                                              | 15.9 (15.5–16.4)                                                                                       | 133.4 (129.6–137.4)                                                          | 29                          |
| Washington                                               | 4,775                                           | 90,700                      | 2,127                                                                               | 604 (586–622)                                              | 15.0 (14.6–15.4)                                                                                       | 126.4 (122.6–130.3)                                                          | 39                          |
| West Virginia                                            | 1,835                                           | 34,868                      | 2,728                                                                               | 227 (220–235)                                              | 20.5 (20.0–21.1)                                                                                       | 123.9 (120.1–127.9)                                                          | 3                           |
| Wisconsin                                                | 4,154                                           | 77,529                      | 2,165                                                                               | 506 (491–521)                                              | 15.4 (15.0–15.9)                                                                                       | 121.8 (118.1–125.5)                                                          | 34                          |
| Wyoming                                                  | 353                                             | 6,532                       | 1,890                                                                               | 39 (38–41)                                                 | 12.0 (11.6–12.3)                                                                                       | 111.4 (107.7–115.3)                                                          | 51                          |
| <b>United States</b>                                     | <b>227,370</b>                                  | <b>4,364,504</b>            | <b>2,232</b>                                                                        | <b>29,759 (28,892–30,650)</b>                              | <b>16.5 (16.0–17.0)</b>                                                                                | <b>130.9 (127.1–134.8)</b>                                                   | –                           |
| <b>Lung, bronchus</b><br><b>(both sexes)</b>             |                                                 |                             |                                                                                     |                                                            |                                                                                                        |                                                                              |                             |
| Alabama                                                  | 2,737                                           | 46,693                      | 743                                                                                 | 485 (468–503)                                              | 7.8 (7.6–8.1)                                                                                          | 177.2 (170.9–183.6)                                                          | 8                           |
| Alaska                                                   | 241                                             | 4,209                       | 581                                                                                 | 44 (43–46)                                                 | 5.4 (5.2–5.6)                                                                                          | 184.0 (177.9–190.3)                                                          | 27                          |
| Arizona                                                  | 2,568                                           | 40,029                      | 466                                                                                 | 340 (327–353)                                              | 4.1 (4.0–4.3)                                                                                          | 132.5 (127.4–137.6)                                                          | 43                          |
| Arkansas                                                 | 1,944                                           | 32,552                      | 866                                                                                 | 318 (306–329)                                              | 8.7 (8.4–9.0)                                                                                          | 163.4 (157.4–169.4)                                                          | 2                           |
| California                                               | 10,260                                          | 163,070                     | 383                                                                                 | 1,441 (1,388–1,495)                                        | 3.2 (3.1–3.4)                                                                                          | 140.5 (135.2–145.7)                                                          | 48                          |
| Colorado                                                 | 1,334                                           | 21,730                      | 361                                                                                 | 193 (186–199)                                              | 3.0 (2.9–3.1)                                                                                          | 144.3 (139.3–149.5)                                                          | 50                          |
| Connecticut                                              | 1,307                                           | 21,090                      | 468                                                                                 | 190 (183–197)                                              | 4.1 (3.9–4.2)                                                                                          | 145.2 (140.0–150.4)                                                          | 44                          |
| Delaware                                                 | 495                                             | 8,180                       | 672                                                                                 | 79 (76–82)                                                 | 7.0 (6.8–7.2)                                                                                          | 159.4 (154.0–164.9)                                                          | 12                          |
| District of<br>Columbia                                  | 173                                             | 3,073                       | 464                                                                                 | 33 (32–34)                                                 | 4.8 (4.6–5.0)                                                                                          | 190.4 (184.4–196.8)                                                          | 32                          |
| Florida                                                  | 10,190                                          | 166,946                     | 585                                                                                 | 1,582 (1,524–1,639)                                        | 6.0 (5.8–6.2)                                                                                          | 155.2 (149.6–160.9)                                                          | 20                          |
| Georgia                                                  | 4,033                                           | 69,424                      | 606                                                                                 | 719 (694–745)                                              | 6.0 (5.8–6.3)                                                                                          | 178.4 (172.1–184.6)                                                          | 18                          |
| Hawaii                                                   | 479                                             | 7,810                       | 435                                                                                 | 74 (71–76)                                                 | 4.2 (4.0–4.3)                                                                                          | 153.6 (147.8–159.3)                                                          | 41                          |

| <b>(eTable 3)</b><br><b>State, sex,</b><br><b>cancer</b> | <b>No. of</b><br><b>cancer</b><br><b>deaths</b> | <b>Total</b><br><b>PYLL</b> | <b>Age-std.</b><br><b>PYLL rate,</b><br><b>per 10<sup>5</sup></b><br><b>persons</b> | <b>Total lost</b><br><b>earnings,</b><br><b>million \$</b> | <b>Age-std. lost</b><br><b>earning rate,</b><br><b>million \$ per</b><br><b>10<sup>5</sup> persons</b> | <b>Average lost</b><br><b>earnings,</b><br><b>\$1000 per</b><br><b>death</b> | <b>State</b><br><b>rank</b> |
|----------------------------------------------------------|-------------------------------------------------|-----------------------------|-------------------------------------------------------------------------------------|------------------------------------------------------------|--------------------------------------------------------------------------------------------------------|------------------------------------------------------------------------------|-----------------------------|
| Idaho                                                    | 555                                             | 8,958                       | 455                                                                                 | 77 (74–80)                                                 | 3.9 (3.8–4.0)                                                                                          | 138.4 (132.9–143.9)                                                          | 45                          |
| Illinois                                                 | 5,551                                           | 92,347                      | 609                                                                                 | 887 (856–919)                                              | 5.7 (5.5–5.9)                                                                                          | 159.8 (154.1–165.6)                                                          | 23                          |
| Indiana                                                  | 3,425                                           | 59,052                      | 750                                                                                 | 598 (579–618)                                              | 7.6 (7.4–7.9)                                                                                          | 174.7 (168.9–180.5)                                                          | 9                           |
| Iowa                                                     | 1,556                                           | 25,481                      | 653                                                                                 | 240 (231–248)                                              | 6.2 (6.0–6.4)                                                                                          | 154.0 (148.4–159.6)                                                          | 17                          |
| Kansas                                                   | 1,315                                           | 21,848                      | 639                                                                                 | 205 (197–212)                                              | 5.9 (5.7–6.1)                                                                                          | 155.6 (150.1–161.2)                                                          | 22                          |
| Kentucky                                                 | 3,186                                           | 55,930                      | 1,004                                                                               | 587 (568–607)                                              | 10.7 (10.3–11.0)                                                                                       | 184.4 (178.3–190.6)                                                          | 1                           |
| Louisiana                                                | 2,404                                           | 41,439                      | 751                                                                                 | 437 (423–452)                                              | 7.9 (7.6–8.1)                                                                                          | 181.8 (175.8–188.1)                                                          | 7                           |
| Maine                                                    | 843                                             | 13,877                      | 704                                                                                 | 131 (126–136)                                              | 6.8 (6.6–7.1)                                                                                          | 155.4 (149.8–161.0)                                                          | 14                          |
| Maryland                                                 | 2,235                                           | 37,563                      | 525                                                                                 | 357 (345–370)                                              | 4.8 (4.6–5.0)                                                                                          | 159.9 (154.5–165.5)                                                          | 31                          |
| Massachusetts                                            | 2,714                                           | 44,156                      | 529                                                                                 | 390 (377–404)                                              | 4.6 (4.4–4.7)                                                                                          | 143.9 (138.9–149.0)                                                          | 36                          |
| Michigan                                                 | 5,005                                           | 85,256                      | 672                                                                                 | 841 (813–870)                                              | 6.7 (6.5–6.9)                                                                                          | 168.1 (162.5–173.8)                                                          | 15                          |
| Minnesota                                                | 2,059                                           | 33,872                      | 513                                                                                 | 309 (298–320)                                              | 4.6 (4.4–4.8)                                                                                          | 150.2 (144.9–155.6)                                                          | 35                          |
| Mississippi                                              | 1,732                                           | 29,487                      | 815                                                                                 | 305 (294–316)                                              | 8.5 (8.2–8.8)                                                                                          | 176.1 (169.8–182.4)                                                          | 4                           |
| Missouri                                                 | 3,459                                           | 58,478                      | 762                                                                                 | 568 (548–587)                                              | 7.5 (7.2–7.7)                                                                                          | 164.1 (158.4–169.8)                                                          | 10                          |
| Montana                                                  | 445                                             | 7,331                       | 531                                                                                 | 64 (61–66)                                                 | 4.7 (4.6–4.9)                                                                                          | 142.8 (137.6–148.1)                                                          | 33                          |
| Nebraska                                                 | 782                                             | 12,918                      | 589                                                                                 | 122 (118–127)                                              | 5.6 (5.4–5.8)                                                                                          | 156.5 (151.1–161.9)                                                          | 24                          |
| Nevada                                                   | 1,164                                           | 18,316                      | 524                                                                                 | 150 (144–156)                                              | 4.2 (4.1–4.4)                                                                                          | 128.9 (123.7–133.9)                                                          | 40                          |
| New Hampshire                                            | 677                                             | 11,398                      | 624                                                                                 | 102 (98–106)                                               | 5.4 (5.3–5.6)                                                                                          | 150.5 (145.3–155.9)                                                          | 25                          |
| New Jersey                                               | 3,157                                           | 51,450                      | 470                                                                                 | 464 (448–481)                                              | 4.1 (4.0–4.3)                                                                                          | 147.1 (141.9–152.4)                                                          | 42                          |
| New Mexico                                               | 666                                             | 10,345                      | 398                                                                                 | 83 (80–86)                                                 | 3.2 (3.1–3.4)                                                                                          | 124.7 (119.8–129.5)                                                          | 47                          |
| New York                                                 | 7,215                                           | 119,196                     | 501                                                                                 | 1,129 (1,090–1,168)                                        | 4.7 (4.5–4.8)                                                                                          | 156.5 (151.1–161.9)                                                          | 34                          |
| North Carolina                                           | 4,909                                           | 82,210                      | 657                                                                                 | 800 (771–829)                                              | 6.4 (6.1–6.6)                                                                                          | 162.9 (156.9–168.9)                                                          | 16                          |
| North Dakota                                             | 254                                             | 3,865                       | 461                                                                                 | 32 (31–33)                                                 | 3.8 (3.7–4.0)                                                                                          | 126.0 (120.8–131.0)                                                          | 46                          |
| Ohio                                                     | 6,338                                           | 108,466                     | 730                                                                                 | 1,096 (1,059–1,134)                                        | 7.4 (7.2–7.7)                                                                                          | 172.9 (167.1–178.9)                                                          | 11                          |
| Oklahoma                                                 | 2,218                                           | 37,265                      | 802                                                                                 | 360 (347–373)                                              | 7.9 (7.6–8.2)                                                                                          | 162.3 (156.4–168.1)                                                          | 6                           |



| <b>(eTable 3)<br/>State, sex,<br/>cancer</b> | <b>No. of<br/>cancer<br/>deaths</b> | <b>Total<br/>PYLL</b> | <b>Age-std.<br/>PYLL rate,<br/>per 10<sup>5</sup><br/>persons</b> | <b>Total lost<br/>earnings,<br/>million \$</b> | <b>Age-std. lost<br/>earning rate,<br/>million \$ per<br/>10<sup>5</sup> persons</b> | <b>Average lost<br/>earnings,<br/>\$1000 per<br/>death</b> | <b>State<br/>rank</b> |
|----------------------------------------------|-------------------------------------|-----------------------|-------------------------------------------------------------------|------------------------------------------------|--------------------------------------------------------------------------------------|------------------------------------------------------------|-----------------------|
| Oregon                                       | 1,677                               | 26,523                | 508                                                               | 222 (214–231)                                  | 4.3 (4.1–4.4)                                                                        | 132.5 (127.4–137.7)                                        | 39                    |
| Pennsylvania                                 | 6,277                               | 103,947               | 617                                                               | 996 (960–1,031)                                | 6.0 (5.8–6.2)                                                                        | 158.6 (153.0–164.3)                                        | 19                    |
| Rhode Island                                 | 529                                 | 8,659                 | 644                                                               | 80 (77–83)                                     | 5.9 (5.7–6.1)                                                                        | 150.9 (145.6–156.4)                                        | 21                    |
| South Carolina                               | 2,509                               | 42,914                | 670                                                               | 433 (417–449)                                  | 7.0 (6.8–7.2)                                                                        | 172.6 (166.4–178.8)                                        | 13                    |
| South Dakota                                 | 367                                 | 6,051                 | 578                                                               | 54 (52–55)                                     | 5.1 (4.9–5.3)                                                                        | 145.8 (140.4–151.2)                                        | 30                    |
| Tennessee                                    | 3,961                               | 68,238                | 821                                                               | 684 (660–708)                                  | 8.4 (8.1–8.6)                                                                        | 172.7 (166.7–178.8)                                        | 5                     |
| Texas                                        | 8,128                               | 134,826               | 482                                                               | 1,272 (1,224–1,319)                            | 4.3 (4.1–4.5)                                                                        | 156.5 (150.6–162.2)                                        | 38                    |
| Utah                                         | 409                                 | 6,893                 | 262                                                               | 69 (67–71)                                     | 2.5 (2.4–2.6)                                                                        | 168.7 (163.1–174.4)                                        | 51                    |
| Vermont                                      | 310                                 | 5,064                 | 585                                                               | 47 (46–49)                                     | 5.3 (5.2–5.5)                                                                        | 152.3 (146.9–157.7)                                        | 28                    |
| Virginia                                     | 3,401                               | 57,012                | 570                                                               | 561 (541–581)                                  | 5.4 (5.2–5.6)                                                                        | 164.9 (159.1–170.8)                                        | 26                    |
| Washington                                   | 2,673                               | 43,288                | 509                                                               | 386 (372–401)                                  | 4.4 (4.2–4.5)                                                                        | 144.6 (139.3–149.9)                                        | 37                    |
| West Virginia                                | 1,332                               | 22,280                | 845                                                               | 220 (211–228)                                  | 8.7 (8.4–9.0)                                                                        | 164.8 (158.6–170.9)                                        | 3                     |
| Wisconsin                                    | 2,468                               | 40,460                | 554                                                               | 382 (368–396)                                  | 5.2 (5.0–5.4)                                                                        | 154.9 (149.2–160.4)                                        | 29                    |
| Wyoming                                      | 177                                 | 2,796                 | 401                                                               | 22 (21–23)                                     | 3.1 (3.0–3.2)                                                                        | 125.7 (120.9–130.6)                                        | 49                    |
| <b>United States</b>                         | <b>133,843</b>                      | <b>2,224,263</b>      | <b>573</b>                                                        | <b>21,262 (20,502–22,024)</b>                  | <b>5.4 (5.2–5.6)</b>                                                                 | <b>158.9 (153.2–164.6)</b>                                 | –                     |
| <b>Lung, bronchus<br/>(men)</b>              |                                     |                       |                                                                   |                                                |                                                                                      |                                                            |                       |
| Alabama                                      | 1,684                               | 27,344                | 944                                                               | 376 (360–394)                                  | 12.9 (12.3–13.5)                                                                     | 223.2 (213.5–233.8)                                        | 5                     |
| Alaska                                       | 138                                 | 2,317                 | 628                                                               | 34 (33–36)                                     | 8.0 (7.6–8.4)                                                                        | 246.5 (236.6–257.5)                                        | 27                    |
| Arizona                                      | 1,367                               | 20,321                | 497                                                               | 248 (236–261)                                  | 6.2 (6.0–6.6)                                                                        | 181.6 (172.7–190.9)                                        | 40                    |
| Arkansas                                     | 1,153                               | 18,315                | 1,019                                                             | 237 (225–249)                                  | 13.2 (12.6–13.9)                                                                     | 205.3 (195.6–215.8)                                        | 3                     |
| California                                   | 5,537                               | 83,202                | 418                                                               | 1,033 (984–1,086)                              | 4.8 (4.6–5.1)                                                                        | 186.6 (177.7–196.1)                                        | 47                    |
| Colorado                                     | 661                                 | 10,298                | 358                                                               | 135 (129–141)                                  | 4.4 (4.2–4.6)                                                                        | 203.9 (194.7–213.8)                                        | 49                    |
| Connecticut                                  | 672                                 | 10,340                | 486                                                               | 133 (127–140)                                  | 5.9 (5.6–6.2)                                                                        | 198.2 (189.1–208.1)                                        | 44                    |
| Delaware                                     | 274                                 | 4,167                 | 737                                                               | 55 (53–58)                                     | 9.9 (9.4–10.3)                                                                       | 200.6 (191.8–210.3)                                        | 15                    |
| District of<br>Columbia                      | 94                                  | 1,645                 | 543                                                               | 24 (24–26)                                     | 7.6 (7.3–8.0)                                                                        | 260.5 (250.2–271.8)                                        | 29                    |

| <b>(eTable 3)</b><br><b>State, sex,</b><br><b>cancer</b> | <b>No. of</b><br><b>cancer</b><br><b>deaths</b> | <b>Total</b><br><b>PYLL</b> | <b>Age-std.</b><br><b>PYLL rate,</b><br><b>per 10<sup>5</sup></b><br><b>persons</b> | <b>Total lost</b><br><b>earnings,</b><br><b>million \$</b> | <b>Age-std. lost</b><br><b>earning rate,</b><br><b>million \$ per</b><br><b>10<sup>5</sup> persons</b> | <b>Average lost</b><br><b>earnings,</b><br><b>\$1000 per</b><br><b>death</b> | <b>State</b><br><b>rank</b> |
|----------------------------------------------------------|-------------------------------------------------|-----------------------------|-------------------------------------------------------------------------------------|------------------------------------------------------------|--------------------------------------------------------------------------------------------------------|------------------------------------------------------------------------------|-----------------------------|
| Florida                                                  | 5,742                                           | 89,136                      | 664                                                                                 | 1,162 (1,109–1,219)                                        | 9.2 (8.8–9.6)                                                                                          | 202.4 (193.2–212.3)                                                          | 18                          |
| Georgia                                                  | 2,400                                           | 39,222                      | 743                                                                                 | 542 (518–567)                                              | 9.6 (9.2–10.1)                                                                                         | 225.7 (216.0–236.4)                                                          | 17                          |
| Hawaii                                                   | 278                                             | 4,370                       | 509                                                                                 | 57 (54–59)                                                 | 6.5 (6.2–6.8)                                                                                          | 203.5 (194.1–213.5)                                                          | 36                          |
| Idaho                                                    | 301                                             | 4,551                       | 470                                                                                 | 54 (52–57)                                                 | 5.5 (5.2–5.8)                                                                                          | 180.4 (171.2–190.1)                                                          | 45                          |
| Illinois                                                 | 3,063                                           | 48,723                      | 686                                                                                 | 649 (620–680)                                              | 8.6 (8.2–9.1)                                                                                          | 211.8 (202.3–222.1)                                                          | 22                          |
| Indiana                                                  | 1,876                                           | 30,478                      | 818                                                                                 | 427 (409–447)                                              | 11.1 (10.7–11.7)                                                                                       | 227.8 (218.3–238.4)                                                          | 9                           |
| Iowa                                                     | 882                                             | 13,607                      | 721                                                                                 | 175 (167–184)                                              | 9.1 (8.6–9.5)                                                                                          | 198.3 (189.1–208.2)                                                          | 20                          |
| Kansas                                                   | 717                                             | 11,136                      | 679                                                                                 | 144 (138–151)                                              | 8.4 (8.0–8.8)                                                                                          | 201.3 (191.9–211.3)                                                          | 24                          |
| Kentucky                                                 | 1,822                                           | 30,311                      | 1,150                                                                               | 434 (416–454)                                              | 16.2 (15.5–16.9)                                                                                       | 238.1 (228.3–249.0)                                                          | 1                           |
| Louisiana                                                | 1,414                                           | 23,287                      | 908                                                                                 | 332 (318–347)                                              | 12.5 (12.0–13.0)                                                                                       | 234.7 (225.1–245.4)                                                          | 7                           |
| Maine                                                    | 458                                             | 7,229                       | 776                                                                                 | 96 (92–101)                                                | 10.4 (10.0–10.9)                                                                                       | 210.6 (201.2–220.8)                                                          | 13                          |
| Maryland                                                 | 1,182                                           | 18,667                      | 569                                                                                 | 250 (239–262)                                              | 7.1 (6.8–7.5)                                                                                          | 211.3 (201.9–221.5)                                                          | 31                          |
| Massachusetts                                            | 1,365                                           | 20,594                      | 538                                                                                 | 261 (249–274)                                              | 6.4 (6.1–6.8)                                                                                          | 191.2 (182.3–200.8)                                                          | 37                          |
| Michigan                                                 | 2,668                                           | 43,301                      | 717                                                                                 | 602 (576–630)                                              | 9.8 (9.4–10.3)                                                                                         | 225.5 (215.8–236.0)                                                          | 16                          |
| Minnesota                                                | 1,074                                           | 16,738                      | 530                                                                                 | 219 (209–230)                                              | 6.7 (6.4–7.0)                                                                                          | 203.9 (194.7–213.9)                                                          | 34                          |
| Mississippi                                              | 1,066                                           | 17,050                      | 1,020                                                                               | 230 (219–241)                                              | 13.4 (12.8–14.0)                                                                                       | 215.4 (205.9–225.9)                                                          | 2                           |
| Missouri                                                 | 1,887                                           | 29,976                      | 828                                                                                 | 402 (385–422)                                              | 11.0 (10.5–11.5)                                                                                       | 213.3 (203.9–223.6)                                                          | 12                          |
| Montana                                                  | 228                                             | 3,480                       | 497                                                                                 | 42 (40–44)                                                 | 6.0 (5.7–6.3)                                                                                          | 184.6 (175.3–194.4)                                                          | 43                          |
| Nebraska                                                 | 420                                             | 6,479                       | 622                                                                                 | 86 (82–90)                                                 | 8.0 (7.7–8.4)                                                                                          | 205.0 (196.0–214.8)                                                          | 26                          |
| Nevada                                                   | 613                                             | 9,070                       | 534                                                                                 | 107 (101–113)                                              | 6.1 (5.8–6.4)                                                                                          | 174.1 (165.4–183.6)                                                          | 41                          |
| New Hampshire                                            | 339                                             | 5,276                       | 601                                                                                 | 67 (64–71)                                                 | 7.4 (7.0–7.7)                                                                                          | 198.7 (189.4–208.7)                                                          | 30                          |
| New Jersey                                               | 1,636                                           | 25,047                      | 500                                                                                 | 323 (308–339)                                              | 6.1 (5.8–6.4)                                                                                          | 197.6 (188.6–207.3)                                                          | 42                          |
| New Mexico                                               | 342                                             | 4,938                       | 404                                                                                 | 57 (54–60)                                                 | 4.7 (4.4–4.9)                                                                                          | 167.5 (158.8–176.6)                                                          | 48                          |
| New York                                                 | 3,805                                           | 59,653                      | 544                                                                                 | 802 (767–840)                                              | 7.0 (6.7–7.3)                                                                                          | 210.7 (201.4–220.8)                                                          | 32                          |
| North Carolina                                           | 2,826                                           | 45,159                      | 778                                                                                 | 599 (572–628)                                              | 10.0 (9.6–10.5)                                                                                        | 211.9 (202.3–222.3)                                                          | 14                          |

| <b>(eTable 3)</b><br><b>State, sex, cancer</b> | <b>No. of cancer deaths</b> | <b>Total PYLL</b> | <b>Age-std. PYLL rate, per 10<sup>5</sup> persons</b> | <b>Total lost earnings, million \$</b> | <b>Age-std. lost earning rate, million \$ per 10<sup>5</sup> persons</b> | <b>Average lost earnings, \$1000 per death</b> | <b>State rank</b> |
|------------------------------------------------|-----------------------------|-------------------|-------------------------------------------------------|----------------------------------------|--------------------------------------------------------------------------|------------------------------------------------|-------------------|
| North Dakota                                   | 146                         | 2,052             | 520                                                   | 23 (21–24)                             | 5.5 (5.2–5.8)                                                            | 155.4 (146.8–164.5)                            | 46                |
| Ohio                                           | 3,559                       | 57,662            | 822                                                   | 797 (762–834)                          | 11.1 (10.7–11.6)                                                         | 223.8 (214.3–234.3)                            | 10                |
| Oklahoma                                       | 1,270                       | 19,969            | 912                                                   | 263 (251–275)                          | 11.9 (11.3–12.5)                                                         | 206.7 (197.3–216.8)                            | 8                 |
| Oregon                                         | 874                         | 13,160            | 526                                                   | 159 (151–167)                          | 6.3 (6.0–6.6)                                                            | 182.1 (173.0–191.5)                            | 38                |
| Pennsylvania                                   | 3,481                       | 54,312            | 684                                                   | 713 (680–748)                          | 8.8 (8.4–9.3)                                                            | 204.7 (195.4–214.8)                            | 21                |
| Rhode Island                                   | 284                         | 4,376             | 714                                                   | 57 (55–60)                             | 9.2 (8.7–9.6)                                                            | 201.0 (192.0–210.8)                            | 19                |
| South Carolina                                 | 1,494                       | 24,180            | 810                                                   | 325 (311–341)                          | 11.1 (10.6–11.6)                                                         | 217.8 (208.0–228.4)                            | 11                |
| South Dakota                                   | 196                         | 2,951             | 574                                                   | 36 (34–38)                             | 6.7 (6.3–7.1)                                                            | 182.5 (173.3–192.1)                            | 33                |
| Tennessee                                      | 2,255                       | 36,438            | 937                                                   | 496 (474–519)                          | 12.6 (12.1–13.2)                                                         | 219.8 (210.0–230.3)                            | 6                 |
| Texas                                          | 4,636                       | 72,717            | 552                                                   | 930 (886–977)                          | 6.5 (6.2–6.9)                                                            | 200.7 (191.2–210.8)                            | 35                |
| Utah                                           | 234                         | 3,653             | 288                                                   | 49 (47–51)                             | 3.7 (3.5–3.8)                                                            | 209.4 (200.3–219.2)                            | 51                |
| Vermont                                        | 167                         | 2,649             | 633                                                   | 35 (34–37)                             | 8.4 (8.1–8.8)                                                            | 211.3 (201.9–221.4)                            | 23                |
| Virginia                                       | 1,930                       | 30,774            | 657                                                   | 414 (395–434)                          | 8.4 (8.0–8.8)                                                            | 214.4 (204.9–224.8)                            | 25                |
| Washington                                     | 1,431                       | 21,692            | 531                                                   | 270 (257–284)                          | 6.3 (5.9–6.6)                                                            | 188.9 (179.9–198.6)                            | 39                |
| West Virginia                                  | 805                         | 12,665            | 1,002                                                 | 165 (158–174)                          | 13.2 (12.7–13.9)                                                         | 205.4 (196.1–215.6)                            | 4                 |
| Wisconsin                                      | 1,369                       | 21,439            | 611                                                   | 285 (272–298)                          | 7.9 (7.5–8.3)                                                            | 207.9 (198.6–217.9)                            | 28                |
| Wyoming                                        | 87                          | 1,285             | 376                                                   | 16 (15–16)                             | 4.4 (4.2–4.6)                                                            | 178.9 (170.0–188.3)                            | 50                |
| <b>United States</b>                           | <b>74,202</b>               | <b>1,167,402</b>  | <b>639</b>                                            | <b>15,427 (14,730–16,178)</b>          | <b>8.2 (7.8–8.6)</b>                                                     | <b>207.9 (198.5–218.0)</b>                     | –                 |
| <b>Lung, bronchus (women)</b>                  |                             |                   |                                                       |                                        |                                                                          |                                                |                   |
| Alabama                                        | 1,053                       | 19,349            | 572                                                   | 109 (105–113)                          | 3.4 (3.2–3.5)                                                            | 103.3 (99.6–107.3)                             | 21                |
| Alaska                                         | 103                         | 1,892             | 535                                                   | 10 (10–11)                             | 2.6 (2.5–2.7)                                                            | 100.0 (96.1–103.9)                             | 36                |
| Arizona                                        | 1,201                       | 19,708            | 438                                                   | 92 (88–96)                             | 2.2 (2.1–2.3)                                                            | 76.4 (73.3–79.8)                               | 45                |
| Arkansas                                       | 791                         | 14,237            | 732                                                   | 81 (78–84)                             | 4.5 (4.4–4.7)                                                            | 102.1 (98.6–105.9)                             | 2                 |
| California                                     | 4,723                       | 79,868            | 354                                                   | 407 (392–424)                          | 1.8 (1.7–1.9)                                                            | 86.2 (83.0–89.7)                               | 49                |
| Colorado                                       | 673                         | 11,432            | 364                                                   | 58 (55–60)                             | 1.8 (1.7–1.8)                                                            | 85.6 (82.3–89.2)                               | 50                |

| <b>(eTable 3)</b><br><b>State, sex,</b><br><b>cancer</b> | <b>No. of</b><br><b>cancer</b><br><b>deaths</b> | <b>Total</b><br><b>PYLL</b> | <b>Age-std.</b><br><b>PYLL rate,</b><br><b>per 10<sup>5</sup></b><br><b>persons</b> | <b>Total lost</b><br><b>earnings,</b><br><b>million \$</b> | <b>Age-std. lost</b><br><b>earning rate,</b><br><b>million \$ per</b><br><b>10<sup>5</sup> persons</b> | <b>Average lost</b><br><b>earnings,</b><br><b>\$1000 per</b><br><b>death</b> | <b>State</b><br><b>rank</b> |
|----------------------------------------------------------|-------------------------------------------------|-----------------------------|-------------------------------------------------------------------------------------|------------------------------------------------------------|--------------------------------------------------------------------------------------------------------|------------------------------------------------------------------------------|-----------------------------|
| Connecticut                                              | 635                                             | 10,749                      | 453                                                                                 | 56 (54–59)                                                 | 2.4 (2.3–2.5)                                                                                          | 88.8 (85.6–92.4)                                                             | 38                          |
| Delaware                                                 | 221                                             | 4,014                       | 620                                                                                 | 24 (23–25)                                                 | 4.1 (4.0–4.2)                                                                                          | 108.0 (104.5–111.8)                                                          | 9                           |
| District of<br>Colombia                                  | 79                                              | 1,429                       | 397                                                                                 | 8 (8–9)                                                    | 2.3 (2.2–2.4)                                                                                          | 106.7 (103.0–110.6)                                                          | 42                          |
| Florida                                                  | 4,448                                           | 77,810                      | 516                                                                                 | 418 (403–434)                                              | 3.1 (3.0–3.2)                                                                                          | 94.0 (90.6–97.7)                                                             | 24                          |
| Georgia                                                  | 1,633                                           | 30,202                      | 492                                                                                 | 177 (171–184)                                              | 2.9 (2.8–3.0)                                                                                          | 108.4 (104.7–112.4)                                                          | 28                          |
| Hawaii                                                   | 201                                             | 3,440                       | 366                                                                                 | 17 (16–18)                                                 | 1.9 (1.8–2.0)                                                                                          | 84.2 (80.8–87.9)                                                             | 47                          |
| Idaho                                                    | 254                                             | 4,407                       | 441                                                                                 | 22 (22–23)                                                 | 2.4 (2.3–2.4)                                                                                          | 88.5 (85.1–92.2)                                                             | 41                          |
| Illinois                                                 | 2,488                                           | 43,625                      | 544                                                                                 | 238 (229–247)                                              | 3.0 (2.9–3.1)                                                                                          | 95.6 (92.2–99.3)                                                             | 26                          |
| Indiana                                                  | 1,549                                           | 28,574                      | 693                                                                                 | 171 (165–177)                                              | 4.3 (4.2–4.5)                                                                                          | 110.1 (106.4–114.0)                                                          | 5                           |
| Iowa                                                     | 674                                             | 11,874                      | 594                                                                                 | 65 (62–67)                                                 | 3.5 (3.4–3.6)                                                                                          | 95.9 (92.4–99.5)                                                             | 17                          |
| Kansas                                                   | 598                                             | 10,713                      | 606                                                                                 | 60 (58–62)                                                 | 3.6 (3.4–3.7)                                                                                          | 100.7 (97.1–104.5)                                                           | 15                          |
| Kentucky                                                 | 1,364                                           | 25,619                      | 879                                                                                 | 153 (148–159)                                              | 5.6 (5.4–5.7)                                                                                          | 112.4 (108.6–116.4)                                                          | 1                           |
| Louisiana                                                | 990                                             | 18,152                      | 618                                                                                 | 105 (101–109)                                              | 3.7 (3.6–3.8)                                                                                          | 106.1 (102.4–110.0)                                                          | 12                          |
| Maine                                                    | 385                                             | 6,647                       | 637                                                                                 | 34 (33–36)                                                 | 3.4 (3.3–3.6)                                                                                          | 89.4 (86.1–93.1)                                                             | 19                          |
| Maryland                                                 | 1,053                                           | 18,897                      | 489                                                                                 | 107 (104–111)                                              | 2.8 (2.7–2.9)                                                                                          | 102.1 (98.5–105.9)                                                           | 30                          |
| Massachusetts                                            | 1,349                                           | 23,562                      | 525                                                                                 | 129 (125–134)                                              | 2.9 (2.8–3.0)                                                                                          | 95.8 (92.4–99.4)                                                             | 27                          |
| Michigan                                                 | 2,337                                           | 41,955                      | 632                                                                                 | 239 (231–248)                                              | 3.8 (3.6–3.9)                                                                                          | 102.4 (98.9–106.2)                                                           | 11                          |
| Minnesota                                                | 985                                             | 17,134                      | 499                                                                                 | 90 (87–94)                                                 | 2.6 (2.5–2.7)                                                                                          | 91.5 (88.1–95.2)                                                             | 34                          |
| Mississippi                                              | 666                                             | 12,438                      | 646                                                                                 | 75 (73–78)                                                 | 4.1 (4.0–4.3)                                                                                          | 113.0 (109.2–117.0)                                                          | 8                           |
| Missouri                                                 | 1,572                                           | 28,503                      | 706                                                                                 | 165 (159–171)                                              | 4.3 (4.2–4.5)                                                                                          | 104.8 (101.2–108.7)                                                          | 6                           |
| Montana                                                  | 217                                             | 3,851                       | 567                                                                                 | 21 (21–22)                                                 | 3.5 (3.4–3.6)                                                                                          | 98.8 (95.4–102.5)                                                            | 16                          |
| Nebraska                                                 | 362                                             | 6,439                       | 562                                                                                 | 36 (35–38)                                                 | 3.3 (3.2–3.4)                                                                                          | 99.9 (96.4–103.7)                                                            | 22                          |
| Nevada                                                   | 551                                             | 9,246                       | 516                                                                                 | 43 (41–45)                                                 | 2.4 (2.3–2.5)                                                                                          | 78.2 (75.0–81.7)                                                             | 37                          |
| New Hampshire                                            | 338                                             | 6,121                       | 648                                                                                 | 34 (33–36)                                                 | 3.6 (3.5–3.8)                                                                                          | 102.0 (98.4–105.9)                                                           | 13                          |
| New Jersey                                               | 1,521                                           | 26,403                      | 446                                                                                 | 141 (136–146)                                              | 2.4 (2.3–2.5)                                                                                          | 92.6 (89.2–96.2)                                                             | 39                          |

| <b>(eTable 3)</b><br><b>State, sex,</b><br><b>cancer</b> | <b>No. of</b><br><b>cancer</b><br><b>deaths</b> | <b>Total</b><br><b>PYLL</b> | <b>Age-std.</b><br><b>PYLL rate,</b><br><b>per 10<sup>5</sup></b><br><b>persons</b> | <b>Total lost</b><br><b>earnings,</b><br><b>million \$</b> | <b>Age-std. lost</b><br><b>earning rate,</b><br><b>million \$ per</b><br><b>10<sup>5</sup> persons</b> | <b>Average lost</b><br><b>earnings,</b><br><b>\$1000 per</b><br><b>death</b> | <b>State</b><br><b>rank</b> |
|----------------------------------------------------------|-------------------------------------------------|-----------------------------|-------------------------------------------------------------------------------------|------------------------------------------------------------|--------------------------------------------------------------------------------------------------------|------------------------------------------------------------------------------|-----------------------------|
| New Mexico                                               | 324                                             | 5,407                       | 392                                                                                 | 26 (25–27)                                                 | 1.9 (1.9–2.0)                                                                                          | 79.3 (76.0–82.8)                                                             | 46                          |
| New York                                                 | 3,410                                           | 59,543                      | 465                                                                                 | 326 (315–339)                                              | 2.6 (2.5–2.7)                                                                                          | 95.7 (92.4–99.4)                                                             | 33                          |
| North Carolina                                           | 2,083                                           | 37,051                      | 556                                                                                 | 201 (193–208)                                              | 3.1 (3.0–3.2)                                                                                          | 96.3 (92.8–100.0)                                                            | 23                          |
| North Dakota                                             | 108                                             | 1,813                       | 413                                                                                 | 9 (9–10)                                                   | 2.2 (2.1–2.3)                                                                                          | 86.0 (82.8–89.5)                                                             | 44                          |
| Ohio                                                     | 2,779                                           | 50,804                      | 652                                                                                 | 299 (289–310)                                              | 4.1 (3.9–4.2)                                                                                          | 107.5 (103.9–111.4)                                                          | 10                          |
| Oklahoma                                                 | 948                                             | 17,296                      | 707                                                                                 | 97 (94–101)                                                | 4.2 (4.1–4.4)                                                                                          | 102.6 (98.9–106.4)                                                           | 7                           |
| Oregon                                                   | 803                                             | 13,363                      | 491                                                                                 | 63 (60–66)                                                 | 2.4 (2.3–2.5)                                                                                          | 78.4 (75.2–81.9)                                                             | 40                          |
| Pennsylvania                                             | 2,796                                           | 49,635                      | 561                                                                                 | 283 (273–293)                                              | 3.4 (3.3–3.6)                                                                                          | 101.0 (97.6–104.7)                                                           | 18                          |
| Rhode Island                                             | 245                                             | 4,283                       | 585                                                                                 | 23 (22–24)                                                 | 3.0 (2.9–3.2)                                                                                          | 92.6 (89.1–96.4)                                                             | 25                          |
| South Carolina                                           | 1,015                                           | 18,734                      | 549                                                                                 | 107 (104–111)                                              | 3.4 (3.3–3.5)                                                                                          | 105.9 (102.1–109.8)                                                          | 20                          |
| South Dakota                                             | 171                                             | 3,100                       | 589                                                                                 | 18 (17–18)                                                 | 3.6 (3.5–3.7)                                                                                          | 103.6 (100.0–107.4)                                                          | 14                          |
| Tennessee                                                | 1,706                                           | 31,800                      | 723                                                                                 | 188 (182–195)                                              | 4.5 (4.4–4.7)                                                                                          | 110.3 (106.5–114.3)                                                          | 3                           |
| Texas                                                    | 3,492                                           | 62,109                      | 421                                                                                 | 341 (328–354)                                              | 2.3 (2.2–2.3)                                                                                          | 97.6 (94.1–101.2)                                                            | 43                          |
| Utah                                                     | 175                                             | 3,239                       | 240                                                                                 | 20 (19–21)                                                 | 1.5 (1.4–1.5)                                                                                          | 114.1 (110.4–117.8)                                                          | 51                          |
| Vermont                                                  | 143                                             | 2,414                       | 539                                                                                 | 12 (11–12)                                                 | 2.8 (2.7–2.9)                                                                                          | 83.2 (79.9–86.6)                                                             | 29                          |
| Virginia                                                 | 1,471                                           | 26,238                      | 494                                                                                 | 147 (142–152)                                              | 2.8 (2.7–2.9)                                                                                          | 99.8 (96.3–103.6)                                                            | 31                          |
| Washington                                               | 1,242                                           | 21,597                      | 490                                                                                 | 116 (112–120)                                              | 2.6 (2.5–2.7)                                                                                          | 93.3 (89.9–97.0)                                                             | 32                          |
| West Virginia                                            | 527                                             | 9,615                       | 706                                                                                 | 54 (52–56)                                                 | 4.4 (4.2–4.5)                                                                                          | 102.5 (98.8–106.4)                                                           | 4                           |
| Wisconsin                                                | 1,099                                           | 19,021                      | 502                                                                                 | 97 (93–101)                                                | 2.6 (2.5–2.7)                                                                                          | 88.5 (85.1–92.1)                                                             | 35                          |
| Wyoming                                                  | 90                                              | 1,511                       | 425                                                                                 | 7 (6–7)                                                    | 1.8 (1.7–1.9)                                                                                          | 74.2 (70.9–77.7)                                                             | 48                          |
| <b>United States</b>                                     | <b>59,641</b>                                   | <b>1,056,861</b>            | <b>517</b>                                                                          | <b>5,821 (5,612–6,041)</b>                                 | <b>2.9 (2.8–3.0)</b>                                                                                   | <b>97.6 (94.1–101.3)</b>                                                     | –                           |
| <b>Breast (female)</b>                                   |                                                 |                             |                                                                                     |                                                            |                                                                                                        |                                                                              |                             |
| Alabama                                                  | 623                                             | 13,283                      | 443                                                                                 | 106 (104–109)                                              | 4.0 (3.9–4.1)                                                                                          | 170.7 (166.3–175.4)                                                          | 9                           |
| Alaska                                                   | 54                                              | 1,232                       | 327                                                                                 | 10 (10–11)                                                 | 2.8 (2.7–2.8)                                                                                          | 193.0 (187.6–198.6)                                                          | 49                          |
| Arizona                                                  | 710                                             | 14,994                      | 377                                                                                 | 118 (115–122)                                              | 3.4 (3.3–3.5)                                                                                          | 166.5 (162.1–171.2)                                                          | 33                          |

| <b>(eTable 3)</b><br><b>State, sex,</b><br><b>cancer</b> | <b>No. of</b><br><b>cancer</b><br><b>deaths</b> | <b>Total</b><br><b>PYLL</b> | <b>Age-std.</b><br><b>PYLL rate,</b><br><b>per 10<sup>5</sup></b><br><b>persons</b> | <b>Total lost</b><br><b>earnings,</b><br><b>million \$</b> | <b>Age-std. lost</b><br><b>earning rate,</b><br><b>million \$ per</b><br><b>10<sup>5</sup> persons</b> | <b>Average lost</b><br><b>earnings,</b><br><b>\$1000 per</b><br><b>death</b> | <b>State</b><br><b>rank</b> |
|----------------------------------------------------------|-------------------------------------------------|-----------------------------|-------------------------------------------------------------------------------------|------------------------------------------------------------|--------------------------------------------------------------------------------------------------------|------------------------------------------------------------------------------|-----------------------------|
| Arkansas                                                 | 313                                             | 6,795                       | 386                                                                                 | 57 (55–58)                                                 | 3.6 (3.6–3.7)                                                                                          | 180.8 (176.1–185.6)                                                          | 19                          |
| California                                               | 3,705                                           | 82,799                      | 383                                                                                 | 710 (692–729)                                              | 3.5 (3.4–3.6)                                                                                          | 191.6 (186.8–196.9)                                                          | 27                          |
| Colorado                                                 | 481                                             | 10,436                      | 348                                                                                 | 86 (84–89)                                                 | 3.1 (3.0–3.1)                                                                                          | 179.4 (174.9–184.3)                                                          | 42                          |
| Connecticut                                              | 339                                             | 7,442                       | 339                                                                                 | 65 (63–66)                                                 | 3.2 (3.2–3.3)                                                                                          | 190.9 (186.4–196.1)                                                          | 39                          |
| Delaware                                                 | 120                                             | 2,540                       | 398                                                                                 | 19 (18–20)                                                 | 3.3 (3.2–3.4)                                                                                          | 157.9 (153.3–162.6)                                                          | 36                          |
| District of<br>Columbia                                  | 88                                              | 1,996                       | 579                                                                                 | 17 (16–17)                                                 | 5.1 (4.9–5.2)                                                                                          | 191.2 (186.0–196.4)                                                          | 1                           |
| Florida                                                  | 2,386                                           | 51,240                      | 396                                                                                 | 419 (409–431)                                              | 3.8 (3.7–3.9)                                                                                          | 175.7 (171.2–180.6)                                                          | 14                          |
| Georgia                                                  | 1,093                                           | 25,030                      | 433                                                                                 | 222 (217–228)                                              | 4.1 (4.0–4.2)                                                                                          | 203.0 (198.1–208.4)                                                          | 7                           |
| Hawaii                                                   | 152                                             | 3,297                       | 392                                                                                 | 27 (26–28)                                                 | 3.6 (3.5–3.7)                                                                                          | 177.4 (172.9–182.3)                                                          | 25                          |
| Idaho                                                    | 179                                             | 3,518                       | 390                                                                                 | 26 (25–27)                                                 | 3.2 (3.2–3.3)                                                                                          | 145.7 (141.8–149.9)                                                          | 38                          |
| Illinois                                                 | 1,461                                           | 31,820                      | 420                                                                                 | 262 (255–269)                                              | 3.7 (3.6–3.8)                                                                                          | 179.1 (174.3–184.1)                                                          | 17                          |
| Indiana                                                  | 708                                             | 14,901                      | 391                                                                                 | 118 (115–121)                                              | 3.4 (3.4–3.5)                                                                                          | 166.1 (161.8–170.7)                                                          | 29                          |
| Iowa                                                     | 318                                             | 6,652                       | 364                                                                                 | 52 (51–54)                                                 | 3.2 (3.2–3.3)                                                                                          | 164.0 (159.7–168.7)                                                          | 37                          |
| Kansas                                                   | 291                                             | 6,045                       | 366                                                                                 | 48 (47–49)                                                 | 3.2 (3.1–3.3)                                                                                          | 165.1 (160.5–169.8)                                                          | 40                          |
| Kentucky                                                 | 500                                             | 10,760                      | 411                                                                                 | 89 (87–92)                                                 | 3.8 (3.7–3.9)                                                                                          | 178.3 (173.9–183.1)                                                          | 16                          |
| Louisiana                                                | 524                                             | 11,734                      | 439                                                                                 | 101 (98–103)                                               | 4.2 (4.1–4.3)                                                                                          | 192.3 (187.4–197.4)                                                          | 4                           |
| Maine                                                    | 165                                             | 3,317                       | 353                                                                                 | 24 (23–25)                                                 | 3.0 (2.9–3.0)                                                                                          | 145.5 (141.3–150.0)                                                          | 47                          |
| Maryland                                                 | 691                                             | 15,292                      | 424                                                                                 | 131 (127–134)                                              | 3.9 (3.8–4.0)                                                                                          | 189.2 (184.6–194.4)                                                          | 12                          |
| Massachusetts                                            | 647                                             | 13,801                      | 334                                                                                 | 114 (111–117)                                              | 3.0 (2.9–3.1)                                                                                          | 175.5 (171.0–180.3)                                                          | 45                          |
| Michigan                                                 | 1,129                                           | 23,915                      | 393                                                                                 | 191 (186–196)                                              | 3.5 (3.4–3.6)                                                                                          | 168.8 (164.4–173.6)                                                          | 26                          |
| Minnesota                                                | 537                                             | 11,281                      | 353                                                                                 | 89 (86–91)                                                 | 3.0 (3.0–3.1)                                                                                          | 165.4 (160.9–170.0)                                                          | 43                          |
| Mississippi                                              | 360                                             | 7,896                       | 430                                                                                 | 63 (61–65)                                                 | 3.8 (3.7–3.9)                                                                                          | 175.6 (170.6–180.6)                                                          | 15                          |
| Missouri                                                 | 728                                             | 15,245                      | 412                                                                                 | 119 (116–122)                                              | 3.6 (3.5–3.7)                                                                                          | 163.2 (158.8–167.9)                                                          | 21                          |
| Montana                                                  | 121                                             | 2,653                       | 436                                                                                 | 22 (21–22)                                                 | 4.1 (4.0–4.2)                                                                                          | 180.7 (175.8–185.9)                                                          | 5                           |
| Nebraska                                                 | 171                                             | 3,385                       | 307                                                                                 | 24 (23–25)                                                 | 2.4 (2.3–2.4)                                                                                          | 141.1 (137.0–145.5)                                                          | 51                          |

| <b>(eTable 3)</b><br><b>State, sex,</b><br><b>cancer</b> | <b>No. of</b><br><b>cancer</b><br><b>deaths</b> | <b>Total</b><br><b>PYLL</b> | <b>Age-std.</b><br><b>PYLL rate,</b><br><b>per 10<sup>5</sup></b><br><b>persons</b> | <b>Total lost</b><br><b>earnings,</b><br><b>million \$</b> | <b>Age-std. lost</b><br><b>earning rate,</b><br><b>million \$ per</b><br><b>10<sup>5</sup> persons</b> | <b>Average lost</b><br><b>earnings,</b><br><b>\$1000 per</b><br><b>death</b> | <b>State</b><br><b>rank</b> |
|----------------------------------------------------------|-------------------------------------------------|-----------------------------|-------------------------------------------------------------------------------------|------------------------------------------------------------|--------------------------------------------------------------------------------------------------------|------------------------------------------------------------------------------|-----------------------------|
| Nevada                                                   | 310                                             | 6,577                       | 392                                                                                 | 52 (51–53)                                                 | 3.4 (3.3–3.4)                                                                                          | 167.4 (162.9–172.2)                                                          | 35                          |
| New Hampshire                                            | 139                                             | 3,068                       | 365                                                                                 | 26 (25–27)                                                 | 3.4 (3.4–3.5)                                                                                          | 188.2 (183.4–193.3)                                                          | 31                          |
| New Jersey                                               | 1,013                                           | 21,474                      | 389                                                                                 | 174 (169–179)                                              | 3.4 (3.3–3.5)                                                                                          | 171.6 (167.1–176.4)                                                          | 34                          |
| New Mexico                                               | 222                                             | 4,722                       | 380                                                                                 | 37 (36–38)                                                 | 3.4 (3.4–3.5)                                                                                          | 168.6 (164.0–173.4)                                                          | 28                          |
| New York                                                 | 2,068                                           | 44,970                      | 377                                                                                 | 373 (363–383)                                              | 3.4 (3.3–3.5)                                                                                          | 180.3 (175.7–185.4)                                                          | 32                          |
| North Carolina                                           | 1,176                                           | 25,979                      | 430                                                                                 | 220 (214–226)                                              | 4.0 (3.9–4.1)                                                                                          | 186.9 (182.3–192.1)                                                          | 8                           |
| North Dakota                                             | 73                                              | 1,712                       | 466                                                                                 | 16 (16–16)                                                 | 4.8 (4.7–4.9)                                                                                          | 219.2 (214.1–224.6)                                                          | 2                           |
| Ohio                                                     | 1,481                                           | 31,583                      | 441                                                                                 | 252 (245–259)                                              | 3.9 (3.8–4.0)                                                                                          | 169.9 (165.4–174.9)                                                          | 11                          |
| Oklahoma                                                 | 455                                             | 9,589                       | 433                                                                                 | 77 (75–79)                                                 | 3.9 (3.8–4.0)                                                                                          | 168.2 (163.9–172.9)                                                          | 13                          |
| Oregon                                                   | 447                                             | 9,335                       | 367                                                                                 | 70 (68–72)                                                 | 3.1 (3.0–3.2)                                                                                          | 156.5 (152.1–161.1)                                                          | 41                          |
| Pennsylvania                                             | 1,609                                           | 33,032                      | 411                                                                                 | 256 (249–263)                                              | 3.7 (3.6–3.8)                                                                                          | 159.2 (154.9–163.7)                                                          | 18                          |
| Rhode Island                                             | 99                                              | 2,159                       | 326                                                                                 | 18 (17–18)                                                 | 3.0 (2.9–3.0)                                                                                          | 180.4 (175.8–185.6)                                                          | 46                          |
| South Carolina                                           | 573                                             | 13,019                      | 437                                                                                 | 112 (109–115)                                              | 4.3 (4.2–4.4)                                                                                          | 194.7 (189.9–200.1)                                                          | 3                           |
| South Dakota                                             | 82                                              | 1,824                       | 379                                                                                 | 15 (15–16)                                                 | 3.6 (3.5–3.7)                                                                                          | 186.8 (181.9–192.0)                                                          | 22                          |
| Tennessee                                                | 802                                             | 17,492                      | 436                                                                                 | 143 (140–148)                                              | 3.9 (3.9–4.0)                                                                                          | 178.8 (174.1–183.9)                                                          | 10                          |
| Texas                                                    | 2,443                                           | 55,613                      | 388                                                                                 | 492 (480–505)                                              | 3.6 (3.5–3.7)                                                                                          | 201.6 (196.6–206.8)                                                          | 23                          |
| Utah                                                     | 217                                             | 4,704                       | 348                                                                                 | 39 (38–40)                                                 | 2.9 (2.9–3.0)                                                                                          | 179.7 (175.1–184.6)                                                          | 48                          |
| Vermont                                                  | 79                                              | 1,673                       | 403                                                                                 | 13 (13–13)                                                 | 3.6 (3.5–3.7)                                                                                          | 163.6 (158.9–168.4)                                                          | 24                          |
| Virginia                                                 | 926                                             | 20,325                      | 405                                                                                 | 168 (164–173)                                              | 3.6 (3.5–3.7)                                                                                          | 181.9 (177.1–187.0)                                                          | 20                          |
| Washington                                               | 727                                             | 15,207                      | 363                                                                                 | 117 (114–121)                                              | 3.0 (3.0–3.1)                                                                                          | 161.5 (157.1–166.1)                                                          | 44                          |
| West Virginia                                            | 239                                             | 5,158                       | 436                                                                                 | 42 (40–43)                                                 | 4.1 (4.0–4.2)                                                                                          | 173.8 (169.1–178.7)                                                          | 6                           |
| Wisconsin                                                | 564                                             | 12,245                      | 363                                                                                 | 103 (100–105)                                              | 3.4 (3.4–3.5)                                                                                          | 182.1 (177.5–186.9)                                                          | 30                          |
| Wyoming                                                  | 58                                              | 1,136                       | 341                                                                                 | 8 (8–8)                                                    | 2.6 (2.5–2.7)                                                                                          | 135.0 (130.9–139.3)                                                          | 50                          |
| <b>United States</b>                                     | <b>34,396</b>                                   | <b>745,895</b>              | <b>395</b>                                                                          | <b>6,150 (5,991–6,321)</b>                                 | <b>3.6 (3.5–3.7)</b>                                                                                   | <b>178.8 (174.2–183.8)</b>                                                   | –                           |
| <b>Colorectum</b><br><b>(both sexes)</b>                 |                                                 |                             |                                                                                     |                                                            |                                                                                                        |                                                                              |                             |

| (eTable 3)<br>State, sex,<br>cancer | No. of<br>cancer<br>deaths | Total<br>PYLL | Age-std.<br>PYLL rate,<br>per 10 <sup>5</sup><br>persons | Total lost<br>earnings,<br>million \$ | Age-std. lost<br>earning rate,<br>million \$ per<br>10 <sup>5</sup> persons | Average lost<br>earnings,<br>\$1000 per<br>death | State<br>rank |
|-------------------------------------|----------------------------|---------------|----------------------------------------------------------|---------------------------------------|-----------------------------------------------------------------------------|--------------------------------------------------|---------------|
| Alabama                             | 806                        | 15,430        | 268                                                      | 193 (188–199)                         | 3.6 (3.5–3.7)                                                               | 239.9 (233.6–246.5)                              | 3             |
| Alaska                              | 71                         | 1,433         | 196                                                      | 19 (19–20)                            | 2.5 (2.4–2.6)                                                               | 269.2 (263.2–275.8)                              | 34            |
| Arizona                             | 811                        | 14,646        | 187                                                      | 182 (177–188)                         | 2.6 (2.5–2.7)                                                               | 224.9 (218.9–231.2)                              | 30            |
| Arkansas                            | 488                        | 9,120         | 259                                                      | 113 (110–116)                         | 3.4 (3.3–3.5)                                                               | 231.2 (224.8–237.9)                              | 4             |
| California                          | 4,202                      | 79,652        | 190                                                      | 1,004 (979–1,030)                     | 2.4 (2.3–2.5)                                                               | 238.9 (232.9–245.1)                              | 38            |
| Colorado                            | 544                        | 10,375        | 175                                                      | 132 (129–136)                         | 2.3 (2.2–2.3)                                                               | 243.4 (237.3–249.9)                              | 43            |
| Connecticut                         | 400                        | 7,101         | 164                                                      | 79 (77–81)                            | 1.9 (1.8–1.9)                                                               | 197.7 (192.4–203.4)                              | 51            |
| Delaware                            | 134                        | 2,362         | 195                                                      | 26 (25–27)                            | 2.3 (2.2–2.4)                                                               | 195.0 (188.9–201.3)                              | 42            |
| District of<br>Columbia             | 84                         | 1,681         | 248                                                      | 22 (21–22)                            | 3.1 (3.1–3.2)                                                               | 257.7 (250.6–265.1)                              | 9             |
| Florida                             | 2,890                      | 51,882        | 199                                                      | 610 (593–628)                         | 2.6 (2.6–2.7)                                                               | 211.2 (205.3–217.3)                              | 29            |
| Georgia                             | 1,361                      | 26,402        | 238                                                      | 346 (337–355)                         | 3.1 (3.1–3.2)                                                               | 254.2 (247.6–261.0)                              | 10            |
| Hawaii                              | 162                        | 3,045         | 179                                                      | 38 (37–39)                            | 2.4 (2.4–2.5)                                                               | 236.1 (229.9–242.6)                              | 36            |
| Idaho                               | 173                        | 3,145         | 174                                                      | 40 (39–41)                            | 2.3 (2.3–2.4)                                                               | 229.4 (223.2–235.8)                              | 40            |
| Illinois                            | 1,836                      | 33,432        | 230                                                      | 400 (389–411)                         | 2.8 (2.7–2.9)                                                               | 217.7 (211.9–223.7)                              | 20            |
| Indiana                             | 944                        | 17,067        | 220                                                      | 202 (196–208)                         | 2.7 (2.6–2.8)                                                               | 213.9 (207.9–220.1)                              | 26            |
| Iowa                                | 423                        | 7,288         | 204                                                      | 82 (80–85)                            | 2.5 (2.5–2.6)                                                               | 194.6 (189.6–200.0)                              | 33            |
| Kansas                              | 372                        | 6,630         | 207                                                      | 81 (79–83)                            | 2.7 (2.6–2.7)                                                               | 217.8 (211.9–223.9)                              | 27            |
| Kentucky                            | 711                        | 13,018        | 247                                                      | 153 (149–158)                         | 3.1 (3.0–3.1)                                                               | 215.7 (209.8–221.9)                              | 12            |
| Louisiana                           | 738                        | 13,856        | 256                                                      | 163 (158–168)                         | 3.1 (3.0–3.2)                                                               | 220.8 (214.4–227.2)                              | 11            |
| Maine                               | 198                        | 3,464         | 189                                                      | 39 (38–40)                            | 2.3 (2.2–2.4)                                                               | 197.7 (192.3–203.6)                              | 41            |
| Maryland                            | 716                        | 13,399        | 196                                                      | 165 (160–169)                         | 2.4 (2.4–2.5)                                                               | 229.8 (223.9–236.0)                              | 35            |
| Massachusetts                       | 703                        | 12,654        | 161                                                      | 152 (148–156)                         | 2.0 (1.9–2.0)                                                               | 216.2 (210.8–221.9)                              | 48            |
| Michigan                            | 1,351                      | 25,206        | 212                                                      | 312 (303–320)                         | 2.8 (2.7–2.9)                                                               | 230.6 (224.6–236.9)                              | 22            |
| Minnesota                           | 596                        | 10,955        | 177                                                      | 132 (129–136)                         | 2.2 (2.2–2.3)                                                               | 222.0 (216.6–227.9)                              | 46            |
| Mississippi                         | 515                        | 9,983         | 291                                                      | 124 (121–127)                         | 3.8 (3.7–3.9)                                                               | 240.8 (234.4–247.4)                              | 1             |



| <b>(eTable 3)</b><br><b>State, sex,</b><br><b>cancer</b> | <b>No. of</b><br><b>cancer</b><br><b>deaths</b> | <b>Total</b><br><b>PYLL</b> | <b>Age-std.</b><br><b>PYLL rate,</b><br><b>per 10<sup>5</sup></b><br><b>persons</b> | <b>Total lost</b><br><b>earnings,</b><br><b>million \$</b> | <b>Age-std. lost</b><br><b>earning rate,</b><br><b>million \$ per</b><br><b>10<sup>5</sup> persons</b> | <b>Average lost</b><br><b>earnings,</b><br><b>\$1000 per</b><br><b>death</b> | <b>State</b><br><b>rank</b> |
|----------------------------------------------------------|-------------------------------------------------|-----------------------------|-------------------------------------------------------------------------------------|------------------------------------------------------------|--------------------------------------------------------------------------------------------------------|------------------------------------------------------------------------------|-----------------------------|
| Missouri                                                 | 868                                             | 15,914                      | 223                                                                                 | 188 (184–194)                                              | 2.8 (2.8–2.9)                                                                                          | 217.2 (211.5–223.3)                                                          | 18                          |
| Montana                                                  | 143                                             | 2,653                       | 206                                                                                 | 34 (33–35)                                                 | 3.0 (2.9–3.1)                                                                                          | 237.9 (231.6–244.6)                                                          | 13                          |
| Nebraska                                                 | 245                                             | 4,134                       | 201                                                                                 | 49 (47–50)                                                 | 2.5 (2.4–2.6)                                                                                          | 198.4 (192.5–204.6)                                                          | 32                          |
| Nevada                                                   | 414                                             | 7,778                       | 235                                                                                 | 99 (97–102)                                                | 3.2 (3.1–3.2)                                                                                          | 239.7 (233.6–246.1)                                                          | 8                           |
| New Hampshire                                            | 149                                             | 2,664                       | 159                                                                                 | 30 (29–31)                                                 | 1.9 (1.8–1.9)                                                                                          | 200.6 (194.9–206.6)                                                          | 50                          |
| New Jersey                                               | 1,150                                           | 20,883                      | 199                                                                                 | 262 (255–269)                                              | 2.6 (2.5–2.6)                                                                                          | 227.8 (221.8–234.0)                                                          | 31                          |
| New Mexico                                               | 278                                             | 5,232                       | 218                                                                                 | 63 (61–65)                                                 | 2.9 (2.8–2.9)                                                                                          | 226.1 (219.9–232.5)                                                          | 16                          |
| New York                                                 | 2,339                                           | 42,016                      | 184                                                                                 | 494 (481–508)                                              | 2.2 (2.2–2.3)                                                                                          | 211.4 (205.6–217.3)                                                          | 44                          |
| North Carolina                                           | 1,339                                           | 25,319                      | 218                                                                                 | 325 (317–334)                                              | 3.0 (2.9–3.0)                                                                                          | 242.9 (236.9–249.3)                                                          | 15                          |
| North Dakota                                             | 89                                              | 1,611                       | 188                                                                                 | 22 (22–23)                                                 | 2.7 (2.6–2.7)                                                                                          | 251.0 (243.3–258.9)                                                          | 28                          |
| Ohio                                                     | 1,713                                           | 31,030                      | 223                                                                                 | 364 (354–374)                                              | 2.8 (2.7–2.8)                                                                                          | 212.3 (206.7–218.3)                                                          | 24                          |
| Oklahoma                                                 | 682                                             | 12,671                      | 285                                                                                 | 157 (153–161)                                              | 3.8 (3.7–3.9)                                                                                          | 229.9 (223.6–236.4)                                                          | 2                           |
| Oregon                                                   | 516                                             | 9,297                       | 189                                                                                 | 107 (104–110)                                              | 2.3 (2.3–2.4)                                                                                          | 206.4 (200.6–212.6)                                                          | 39                          |
| Pennsylvania                                             | 1,930                                           | 34,292                      | 220                                                                                 | 405 (394–416)                                              | 2.8 (2.7–2.9)                                                                                          | 209.8 (204.1–215.8)                                                          | 21                          |
| Rhode Island                                             | 135                                             | 2,463                       | 200                                                                                 | 32 (31–33)                                                 | 2.7 (2.7–2.8)                                                                                          | 235.4 (229.0–241.8)                                                          | 25                          |
| South Carolina                                           | 723                                             | 13,641                      | 234                                                                                 | 172 (168–177)                                              | 3.2 (3.1–3.3)                                                                                          | 238.1 (231.9–244.5)                                                          | 6                           |
| South Dakota                                             | 127                                             | 2,229                       | 224                                                                                 | 26 (26–27)                                                 | 2.8 (2.8–2.9)                                                                                          | 207.8 (202.1–213.9)                                                          | 19                          |
| Tennessee                                                | 1,025                                           | 18,860                      | 241                                                                                 | 224 (218–230)                                              | 3.0 (2.9–3.1)                                                                                          | 218.4 (212.4–224.6)                                                          | 14                          |
| Texas                                                    | 3,107                                           | 60,663                      | 217                                                                                 | 805 (785–826)                                              | 2.9 (2.8–2.9)                                                                                          | 259.2 (252.5–266.0)                                                          | 17                          |
| Utah                                                     | 214                                             | 4,127                       | 160                                                                                 | 52 (51–53)                                                 | 2.0 (1.9–2.0)                                                                                          | 242.5 (236.9–248.4)                                                          | 49                          |
| Vermont                                                  | 96                                              | 1,761                       | 230                                                                                 | 22 (21–23)                                                 | 3.2 (3.1–3.3)                                                                                          | 228.4 (222.5–234.5)                                                          | 7                           |
| Virginia                                                 | 1,064                                           | 20,157                      | 213                                                                                 | 258 (251–265)                                              | 2.8 (2.7–2.8)                                                                                          | 242.4 (236.1–248.9)                                                          | 23                          |
| Washington                                               | 765                                             | 14,114                      | 174                                                                                 | 175 (170–180)                                              | 2.2 (2.2–2.3)                                                                                          | 228.8 (222.8–235.1)                                                          | 45                          |
| West Virginia                                            | 360                                             | 6,227                       | 254                                                                                 | 71 (69–73)                                                 | 3.2 (3.2–3.3)                                                                                          | 196.4 (190.8–202.4)                                                          | 5                           |
| Wisconsin                                                | 674                                             | 11,808                      | 169                                                                                 | 141 (137–145)                                              | 2.1 (2.0–2.1)                                                                                          | 208.7 (202.7–214.9)                                                          | 47                          |

| <b>(eTable 3)</b><br><b>State, sex,</b><br><b>cancer</b> | <b>No. of</b><br><b>cancer</b><br><b>deaths</b> | <b>Total</b><br><b>PYLL</b> | <b>Age-std.</b><br><b>PYLL rate,</b><br><b>per 10<sup>5</sup></b><br><b>persons</b> | <b>Total lost</b><br><b>earnings,</b><br><b>million \$</b> | <b>Age-std. lost</b><br><b>earning rate,</b><br><b>million \$ per</b><br><b>10<sup>5</sup> persons</b> | <b>Average lost</b><br><b>earnings,</b><br><b>\$1000 per</b><br><b>death</b> | <b>State</b><br><b>rank</b> |
|----------------------------------------------------------|-------------------------------------------------|-----------------------------|-------------------------------------------------------------------------------------|------------------------------------------------------------|--------------------------------------------------------------------------------------------------------|------------------------------------------------------------------------------|-----------------------------|
| Wyoming                                                  | 74                                              | 1,365                       | 199                                                                                 | 17 (16–17)                                                 | 2.4 (2.4–2.5)                                                                                          | 225.1 (219.1–231.3)                                                          | 37                          |
| <b>United States</b>                                     | <b>41,448</b>                                   | <b>766,136</b>              | <b>208</b>                                                                          | <b>9,404 (9,154–9,661)</b>                                 | <b>2.7 (2.6–2.7)</b>                                                                                   | <b>226.9 (220.8–233.1)</b>                                                   | –                           |
| <b>Colorectum</b><br><b>(men)</b>                        |                                                 |                             |                                                                                     |                                                            |                                                                                                        |                                                                              |                             |
| Alabama                                                  | 454                                             | 8,192                       | 299                                                                                 | 137 (133–142)                                              | 5.2 (5.0–5.4)                                                                                          | 302.7 (292.5–313.8)                                                          | 3                           |
| Alaska                                                   | 34                                              | 699                         | 188                                                                                 | 14 (13–14)                                                 | 3.6 (3.5–3.7)                                                                                          | 405.3 (393.5–417.5)                                                          | 35                          |
| Arizona                                                  | 477                                             | 8,397                       | 225                                                                                 | 140 (135–145)                                              | 4.1 (3.9–4.2)                                                                                          | 292.9 (283.3–303.3)                                                          | 27                          |
| Arkansas                                                 | 286                                             | 5,135                       | 298                                                                                 | 83 (80–86)                                                 | 5.0 (4.9–5.2)                                                                                          | 289.1 (278.8–300.4)                                                          | 6                           |
| California                                               | 2,307                                           | 41,783                      | 207                                                                                 | 715 (692–741)                                              | 3.5 (3.4–3.6)                                                                                          | 310.0 (300.0–321.0)                                                          | 39                          |
| Colorado                                                 | 307                                             | 5,671                       | 198                                                                                 | 99 (96–102)                                                | 3.4 (3.3–3.5)                                                                                          | 321.7 (311.5–332.8)                                                          | 40                          |
| Connecticut                                              | 208                                             | 3,469                       | 170                                                                                 | 55 (53–57)                                                 | 2.7 (2.6–2.8)                                                                                          | 262.3 (253.0–272.6)                                                          | 49                          |
| Delaware                                                 | 75                                              | 1,250                       | 207                                                                                 | 18 (17–19)                                                 | 3.0 (2.9–3.1)                                                                                          | 240.4 (230.6–251.3)                                                          | 47                          |
| District of<br>Columbia                                  | 48                                              | 935                         | 301                                                                                 | 16 (16–17)                                                 | 5.0 (4.8–5.2)                                                                                          | 336.6 (325.0–348.7)                                                          | 7                           |
| Florida                                                  | 1,637                                           | 27,842                      | 223                                                                                 | 440 (424–457)                                              | 3.9 (3.8–4.0)                                                                                          | 268.6 (259.3–279.0)                                                          | 33                          |
| Georgia                                                  | 798                                             | 14,729                      | 283                                                                                 | 253 (245–262)                                              | 4.8 (4.6–4.9)                                                                                          | 317.3 (306.9–328.8)                                                          | 10                          |
| Hawaii                                                   | 91                                              | 1,676                       | 204                                                                                 | 29 (28–30)                                                 | 3.7 (3.6–3.8)                                                                                          | 315.5 (305.0–326.8)                                                          | 34                          |
| Idaho                                                    | 109                                             | 1,825                       | 204                                                                                 | 30 (29–31)                                                 | 3.4 (3.3–3.5)                                                                                          | 271.9 (262.7–282.0)                                                          | 41                          |
| Illinois                                                 | 1,019                                           | 17,712                      | 256                                                                                 | 288 (278–299)                                              | 4.1 (4.0–4.3)                                                                                          | 282.6 (273.0–293.1)                                                          | 23                          |
| Indiana                                                  | 530                                             | 9,320                       | 252                                                                                 | 151 (145–156)                                              | 4.1 (4.0–4.2)                                                                                          | 284.0 (274.1–295.0)                                                          | 25                          |
| Iowa                                                     | 226                                             | 3,626                       | 212                                                                                 | 57 (55–59)                                                 | 3.5 (3.4–3.6)                                                                                          | 251.8 (243.1–261.3)                                                          | 37                          |
| Kansas                                                   | 212                                             | 3,786                       | 246                                                                                 | 63 (61–66)                                                 | 4.3 (4.1–4.4)                                                                                          | 299.4 (289.5–310.1)                                                          | 19                          |
| Kentucky                                                 | 398                                             | 6,919                       | 275                                                                                 | 110 (106–114)                                              | 4.5 (4.3–4.6)                                                                                          | 276.1 (266.3–286.8)                                                          | 15                          |
| Louisiana                                                | 414                                             | 7,359                       | 281                                                                                 | 116 (112–121)                                              | 4.4 (4.3–4.6)                                                                                          | 280.0 (269.5–291.2)                                                          | 16                          |
| Maine                                                    | 104                                             | 1,780                       | 199                                                                                 | 29 (28–30)                                                 | 3.4 (3.3–3.5)                                                                                          | 276.1 (266.5–286.8)                                                          | 43                          |
| Maryland                                                 | 390                                             | 6,907                       | 215                                                                                 | 115 (111–119)                                              | 3.5 (3.4–3.7)                                                                                          | 295.1 (285.2–306.2)                                                          | 36                          |
| Massachusetts                                            | 362                                             | 6,433                       | 171                                                                                 | 109 (105–112)                                              | 2.9 (2.8–3.0)                                                                                          | 299.8 (290.0–310.7)                                                          | 48                          |

| <b>(eTable 3)<br/>State, sex,<br/>cancer</b> | <b>No. of<br/>cancer<br/>deaths</b> | <b>Total<br/>PYLL</b> | <b>Age-std.<br/>PYLL rate,<br/>per 10<sup>5</sup><br/>persons</b> | <b>Total lost<br/>earnings,<br/>million \$</b> | <b>Age-std. lost<br/>earning rate,<br/>million \$ per<br/>10<sup>5</sup> persons</b> | <b>Average lost<br/>earnings,<br/>\$1000 per<br/>death</b> | <b>State<br/>rank</b> |
|----------------------------------------------|-------------------------------------|-----------------------|-------------------------------------------------------------------|------------------------------------------------|--------------------------------------------------------------------------------------|------------------------------------------------------------|-----------------------|
| Michigan                                     | 759                                 | 13,551                | 239                                                               | 226 (219–234)                                  | 4.2 (4.0–4.3)                                                                        | 297.9 (287.9–308.8)                                        | 22                    |
| Minnesota                                    | 315                                 | 5,494                 | 181                                                               | 91 (88–94)                                     | 3.0 (2.9–3.1)                                                                        | 288.8 (279.3–299.3)                                        | 46                    |
| Mississippi                                  | 292                                 | 5,241                 | 323                                                               | 86 (83–89)                                     | 5.5 (5.3–5.7)                                                                        | 294.0 (283.8–305.2)                                        | 2                     |
| Missouri                                     | 469                                 | 8,306                 | 246                                                               | 137 (132–142)                                  | 4.2 (4.1–4.4)                                                                        | 291.5 (281.7–302.1)                                        | 20                    |
| Montana                                      | 84                                  | 1,547                 | 258                                                               | 28 (27–29)                                     | 5.0 (4.9–5.2)                                                                        | 327.9 (317.8–339.3)                                        | 5                     |
| Nebraska                                     | 145                                 | 2,477                 | 248                                                               | 39 (38–41)                                     | 4.1 (3.9–4.2)                                                                        | 268.9 (259.3–279.3)                                        | 28                    |
| Nevada                                       | 241                                 | 4,312                 | 269                                                               | 74 (72–77)                                     | 4.8 (4.6–4.9)                                                                        | 309.0 (299.2–319.8)                                        | 9                     |
| New Hampshire                                | 82                                  | 1,387                 | 166                                                               | 21 (21–22)                                     | 2.6 (2.5–2.7)                                                                        | 259.8 (250.1–270.5)                                        | 50                    |
| New Jersey                                   | 658                                 | 11,806                | 239                                                               | 200 (193–207)                                  | 4.0 (3.9–4.2)                                                                        | 303.7 (293.8–314.5)                                        | 29                    |
| New Mexico                                   | 162                                 | 2,770                 | 235                                                               | 43 (42–45)                                     | 3.9 (3.8–4.1)                                                                        | 266.9 (257.2–277.5)                                        | 32                    |
| New York                                     | 1,273                               | 21,989                | 207                                                               | 358 (346–371)                                  | 3.4 (3.3–3.5)                                                                        | 281.2 (271.7–291.8)                                        | 42                    |
| North Carolina                               | 753                                 | 13,780                | 254                                                               | 241 (234–250)                                  | 4.6 (4.4–4.7)                                                                        | 320.6 (310.5–331.8)                                        | 13                    |
| North Dakota                                 | 61                                  | 1,141                 | 270                                                               | 19 (19–20)                                     | 4.6 (4.4–4.8)                                                                        | 319.5 (308.8–331.2)                                        | 12                    |
| Ohio                                         | 922                                 | 15,907                | 239                                                               | 256 (247–265)                                  | 4.0 (3.8–4.1)                                                                        | 277.2 (267.6–287.7)                                        | 31                    |
| Oklahoma                                     | 390                                 | 7,108                 | 335                                                               | 120 (116–124)                                  | 5.9 (5.7–6.1)                                                                        | 306.7 (296.5–318.0)                                        | 1                     |
| Oregon                                       | 285                                 | 4,952                 | 209                                                               | 78 (75–81)                                     | 3.5 (3.4–3.6)                                                                        | 272.2 (262.2–283.0)                                        | 38                    |
| Pennsylvania                                 | 1,052                               | 18,076                | 243                                                               | 293 (283–304)                                  | 4.1 (4.0–4.3)                                                                        | 278.8 (269.4–289.2)                                        | 24                    |
| Rhode Island                                 | 83                                  | 1,446                 | 249                                                               | 24 (23–25)                                     | 4.2 (4.1–4.3)                                                                        | 286.9 (277.2–297.7)                                        | 21                    |
| South Carolina                               | 406                                 | 7,361                 | 265                                                               | 124 (120–129)                                  | 4.8 (4.6–4.9)                                                                        | 306.2 (295.9–317.4)                                        | 11                    |
| South Dakota                                 | 74                                  | 1,277                 | 268                                                               | 21 (20–21)                                     | 4.5 (4.4–4.7)                                                                        | 279.2 (270.0–289.3)                                        | 14                    |
| Tennessee                                    | 564                                 | 9,848                 | 265                                                               | 158 (153–165)                                  | 4.4 (4.2–4.5)                                                                        | 280.9 (271.0–291.9)                                        | 17                    |
| Texas                                        | 1,825                               | 34,191                | 256                                                               | 599 (580–620)                                  | 4.4 (4.2–4.5)                                                                        | 328.5 (318.0–339.9)                                        | 18                    |
| Utah                                         | 108                                 | 1,921                 | 151                                                               | 32 (31–34)                                     | 2.5 (2.4–2.6)                                                                        | 300.6 (290.8–311.3)                                        | 51                    |
| Vermont                                      | 53                                  | 956                   | 254                                                               | 16 (16–17)                                     | 4.8 (4.7–4.9)                                                                        | 305.5 (295.5–316.2)                                        | 8                     |
| Virginia                                     | 616                                 | 11,126                | 244                                                               | 188 (182–195)                                  | 4.1 (4.0–4.2)                                                                        | 304.8 (294.8–316.0)                                        | 26                    |

| <b>(eTable 3)</b><br><b>State, sex, cancer</b> | <b>No. of cancer deaths</b> | <b>Total PYLL</b> | <b>Age-std. PYLL rate, per 10<sup>5</sup> persons</b> | <b>Total lost earnings, million \$</b> | <b>Age-std. lost earning rate, million \$ per 10<sup>5</sup> persons</b> | <b>Average lost earnings, \$1000 per death</b> | <b>State rank</b> |
|------------------------------------------------|-----------------------------|-------------------|-------------------------------------------------------|----------------------------------------|--------------------------------------------------------------------------|------------------------------------------------|-------------------|
| Washington                                     | 431                         | 7,668             | 196                                                   | 129 (125–134)                          | 3.3 (3.2–3.4)                                                            | 299.9 (290.0–311.0)                            | 44                |
| West Virginia                                  | 193                         | 3,358             | 293                                                   | 54 (52–56)                             | 5.2 (5.0–5.3)                                                            | 281.7 (271.9–292.3)                            | 4                 |
| Wisconsin                                      | 396                         | 6,742             | 198                                                   | 107 (103–111)                          | 3.2 (3.1–3.3)                                                            | 269.0 (259.5–279.5)                            | 45                |
| Wyoming                                        | 40                          | 737               | 223                                                   | 13 (12–13)                             | 4.0 (3.9–4.1)                                                            | 313.6 (303.4–324.5)                            | 30                |
| <b>United States</b>                           | <b>23,218</b>               | <b>411,919</b>    | <b>234</b>                                            | <b>6,841 (6,611–7,094)</b>             | <b>4.0 (3.8–4.1)</b>                                                     | <b>294.6 (284.8–305.5)</b>                     | –                 |
| <b>Colorectum (women)</b>                      |                             |                   |                                                       |                                        |                                                                          |                                                |                   |
| Alabama                                        | 352                         | 7,238             | 242                                                   | 56 (54–57)                             | 2.1 (2.0–2.2)                                                            | 158.7 (154.4–163.4)                            | 2                 |
| Alaska                                         | 37                          | 734               | 201                                                   | 5 (5–5)                                | 1.3 (1.2–1.3)                                                            | 144.2 (139.9–148.6)                            | 33                |
| Arizona                                        | 334                         | 6,249             | 151                                                   | 43 (41–44)                             | 1.2 (1.1–1.2)                                                            | 127.7 (124.0–131.4)                            | 41                |
| Arkansas                                       | 202                         | 3,985             | 223                                                   | 30 (29–31)                             | 1.9 (1.9–2.0)                                                            | 149.1 (145.1–153.3)                            | 3                 |
| California                                     | 1,895                       | 37,869            | 175                                                   | 288 (281–296)                          | 1.4 (1.4–1.4)                                                            | 152.1 (148.1–156.4)                            | 29                |
| Colorado                                       | 237                         | 4,704             | 152                                                   | 34 (33–35)                             | 1.1 (1.1–1.2)                                                            | 141.7 (137.7–145.9)                            | 45                |
| Connecticut                                    | 192                         | 3,632             | 159                                                   | 24 (24–25)                             | 1.2 (1.1–1.2)                                                            | 127.5 (123.8–131.4)                            | 42                |
| Delaware                                       | 59                          | 1,112             | 184                                                   | 8 (8–8)                                | 1.5 (1.4–1.5)                                                            | 137.1 (133.3–141.2)                            | 23                |
| District of Columbia                           | 36                          | 746               | 201                                                   | 5 (5–6)                                | 1.4 (1.4–1.5)                                                            | 152.4 (148.1–157.0)                            | 27                |
| Florida                                        | 1,253                       | 24,040            | 178                                                   | 170 (166–175)                          | 1.5 (1.4–1.5)                                                            | 136.0 (132.1–140.1)                            | 21                |
| Georgia                                        | 563                         | 11,674            | 199                                                   | 93 (90–95)                             | 1.6 (1.6–1.7)                                                            | 164.4 (160.1–169.0)                            | 12                |
| Hawaii                                         | 71                          | 1,368             | 156                                                   | 10 (9–10)                              | 1.2 (1.2–1.2)                                                            | 134.3 (130.4–138.4)                            | 38                |
| Idaho                                          | 64                          | 1,320             | 147                                                   | 10 (10–10)                             | 1.3 (1.2–1.3)                                                            | 156.8 (152.6–161.3)                            | 35                |
| Illinois                                       | 817                         | 15,720            | 207                                                   | 112 (109–115)                          | 1.6 (1.5–1.6)                                                            | 136.6 (132.8–140.6)                            | 13                |
| Indiana                                        | 414                         | 7,747             | 190                                                   | 51 (50–53)                             | 1.4 (1.3–1.4)                                                            | 124.0 (120.2–127.9)                            | 31                |
| Iowa                                           | 197                         | 3,662             | 199                                                   | 25 (25–26)                             | 1.6 (1.5–1.6)                                                            | 128.8 (125.2–132.6)                            | 14                |
| Kansas                                         | 160                         | 2,844             | 168                                                   | 18 (17–18)                             | 1.1 (1.1–1.1)                                                            | 109.5 (106.1–113.2)                            | 46                |
| Kentucky                                       | 313                         | 6,099             | 222                                                   | 43 (42–45)                             | 1.7 (1.7–1.8)                                                            | 138.8 (134.8–142.9)                            | 9                 |
| Louisiana                                      | 324                         | 6,497             | 235                                                   | 47 (46–48)                             | 1.9 (1.8–1.9)                                                            | 144.8 (140.6–149.1)                            | 5                 |

| <b>(eTable 3)</b><br><b>State, sex, cancer</b> | <b>No. of cancer deaths</b> | <b>Total PYLL</b> | <b>Age-std. PYLL rate, per 10<sup>5</sup> persons</b> | <b>Total lost earnings, million \$</b> | <b>Age-std. lost earning rate, million \$ per 10<sup>5</sup> persons</b> | <b>Average lost earnings, \$1000 per death</b> | <b>State rank</b> |
|------------------------------------------------|-----------------------------|-------------------|-------------------------------------------------------|----------------------------------------|--------------------------------------------------------------------------|------------------------------------------------|-------------------|
| Maine                                          | 94                          | 1,684             | 179                                                   | 10 (10–11)                             | 1.3 (1.3–1.3)                                                            | 110.9 (107.5–114.6)                            | 32                |
| Maryland                                       | 326                         | 6,492             | 180                                                   | 49 (48–51)                             | 1.5 (1.4–1.5)                                                            | 151.4 (147.5–155.7)                            | 24                |
| Massachusetts                                  | 341                         | 6,221             | 151                                                   | 43 (42–45)                             | 1.1 (1.1–1.2)                                                            | 127.3 (123.8–130.9)                            | 43                |
| Michigan                                       | 592                         | 11,655            | 188                                                   | 85 (83–88)                             | 1.5 (1.5–1.6)                                                            | 144.2 (140.2–148.4)                            | 19                |
| Minnesota                                      | 281                         | 5,462             | 173                                                   | 41 (40–42)                             | 1.4 (1.4–1.5)                                                            | 147.0 (143.1–151.1)                            | 26                |
| Mississippi                                    | 223                         | 4,743             | 265                                                   | 38 (37–39)                             | 2.3 (2.3–2.4)                                                            | 170.9 (166.4–175.9)                            | 1                 |
| Missouri                                       | 399                         | 7,608             | 202                                                   | 52 (50–53)                             | 1.5 (1.5–1.6)                                                            | 129.7 (125.9–133.6)                            | 18                |
| Montana                                        | 59                          | 1,105             | 154                                                   | 6 (6–7)                                | 1.0 (1.0–1.0)                                                            | 109.5 (105.6–113.5)                            | 50                |
| Nebraska                                       | 100                         | 1,657             | 155                                                   | 10 (9–10)                              | 1.0 (1.0–1.0)                                                            | 95.9 (93.0–98.9)                               | 49                |
| Nevada                                         | 173                         | 3,466             | 202                                                   | 25 (24–25)                             | 1.5 (1.5–1.6)                                                            | 142.9 (138.8–147.3)                            | 17                |
| New Hampshire                                  | 67                          | 1,277             | 153                                                   | 9 (8–9)                                | 1.2 (1.2–1.2)                                                            | 127.9 (124.1–131.7)                            | 40                |
| New Jersey                                     | 492                         | 9,077             | 164                                                   | 62 (60–64)                             | 1.2 (1.2–1.2)                                                            | 126.1 (122.5–129.8)                            | 37                |
| New Mexico                                     | 116                         | 2,461             | 204                                                   | 20 (19–20)                             | 1.9 (1.8–1.9)                                                            | 168.9 (164.5–173.6)                            | 4                 |
| New York                                       | 1,066                       | 20,027            | 164                                                   | 136 (132–140)                          | 1.2 (1.2–1.2)                                                            | 127.8 (124.1–131.6)                            | 39                |
| North Carolina                                 | 586                         | 11,539            | 185                                                   | 84 (81–86)                             | 1.5 (1.4–1.5)                                                            | 142.9 (138.9–147.1)                            | 22                |
| North Dakota                                   | 28                          | 470               | 105                                                   | 3 (3–3)                                | 0.6 (0.6–0.7)                                                            | 101.4 (98.2–104.9)                             | 51                |
| Ohio                                           | 791                         | 15,123            | 209                                                   | 108 (105–111)                          | 1.7 (1.6–1.7)                                                            | 136.5 (132.8–140.5)                            | 11                |
| Oklahoma                                       | 292                         | 5,563             | 239                                                   | 37 (36–38)                             | 1.8 (1.7–1.8)                                                            | 127.1 (123.1–131.1)                            | 6                 |
| Oregon                                         | 231                         | 4,345             | 169                                                   | 29 (28–30)                             | 1.2 (1.2–1.3)                                                            | 125.2 (121.3–129.3)                            | 36                |
| Pennsylvania                                   | 878                         | 16,216            | 199                                                   | 111 (108–115)                          | 1.6 (1.5–1.6)                                                            | 127.0 (123.4–130.7)                            | 15                |
| Rhode Island                                   | 52                          | 1,017             | 159                                                   | 8 (8–8)                                | 1.4 (1.4–1.5)                                                            | 153.1 (149.3–157.1)                            | 28                |
| South Carolina                                 | 317                         | 6,280             | 207                                                   | 48 (47–49)                             | 1.8 (1.7–1.8)                                                            | 150.6 (146.7–154.9)                            | 7                 |
| South Dakota                                   | 53                          | 952               | 179                                                   | 6 (6–6)                                | 1.1 (1.1–1.1)                                                            | 108.0 (104.3–111.9)                            | 47                |
| Tennessee                                      | 461                         | 9,012             | 220                                                   | 65 (64–67)                             | 1.8 (1.7–1.8)                                                            | 141.8 (137.8–145.9)                            | 8                 |
| Texas                                          | 1,282                       | 26,472            | 182                                                   | 205 (200–211)                          | 1.4 (1.4–1.5)                                                            | 160.2 (155.9–164.8)                            | 25                |

| <b>(eTable 3)</b><br><b>State, sex, cancer</b> | <b>No. of cancer deaths</b> | <b>Total PYLL</b> | <b>Age-std. PYLL rate, per 10<sup>5</sup> persons</b> | <b>Total lost earnings, million \$</b> | <b>Age-std. lost earning rate, million \$ per 10<sup>5</sup> persons</b> | <b>Average lost earnings, \$1000 per death</b> | <b>State rank</b> |
|------------------------------------------------|-----------------------------|-------------------|-------------------------------------------------------|----------------------------------------|--------------------------------------------------------------------------|------------------------------------------------|-------------------|
| Utah                                           | 106                         | 2,206             | 170                                                   | 19 (19–20)                             | 1.5 (1.5–1.6)                                                            | 183.1 (178.9–187.7)                            | 20                |
| Vermont                                        | 43                          | 805               | 206                                                   | 6 (6–6)                                | 1.7 (1.6–1.7)                                                            | 133.3 (129.5–137.2)                            | 10                |
| Virginia                                       | 448                         | 9,030             | 185                                                   | 70 (68–72)                             | 1.5 (1.5–1.6)                                                            | 156.4 (152.3–160.7)                            | 16                |
| Washington                                     | 334                         | 6,446             | 152                                                   | 46 (44–47)                             | 1.1 (1.1–1.2)                                                            | 136.9 (133.1–141.0)                            | 44                |
| West Virginia                                  | 167                         | 2,868             | 216                                                   | 16 (16–17)                             | 1.4 (1.3–1.4)                                                            | 97.9 (94.6–101.4)                              | 30                |
| Wisconsin                                      | 278                         | 5,067             | 141                                                   | 34 (33–35)                             | 1.0 (1.0–1.0)                                                            | 122.6 (119.0–126.4)                            | 48                |
| Wyoming                                        | 34                          | 629               | 187                                                   | 4 (4–4)                                | 1.3 (1.2–1.3)                                                            | 120.8 (117.1–124.9)                            | 34                |
| <b>United States</b>                           | <b>18,230</b>               | <b>354,218</b>    | <b>184</b>                                            | <b>2,559 (2,488–2,634)</b>             | <b>1.5 (1.4–1.5)</b>                                                     | <b>140.4 (136.5–144.5)</b>                     | –                 |
| <b>Prostate</b>                                |                             |                   |                                                       |                                        |                                                                          |                                                |                   |
| Alabama                                        | 372                         | 4,712             | 175                                                   | 46 (43–49)                             | 1.6 (1.5–1.7)                                                            | 122.4 (114.9–130.4)                            | 4                 |
| Alaska                                         | 26                          | 405               | 106                                                   | 5 (5–5)                                | 1.1 (1.0–1.1)                                                            | 185.3 (175.4–195.8)                            | 40                |
| Arizona                                        | 455                         | 5,703             | 139                                                   | 51 (48–55)                             | 1.2 (1.2–1.3)                                                            | 113.1 (105.5–121.1)                            | 26                |
| Arkansas                                       | 222                         | 2,743             | 162                                                   | 26 (24–27)                             | 1.4 (1.3–1.5)                                                            | 115.5 (108.3–123.4)                            | 10                |
| California                                     | 2,127                       | 27,411            | 146                                                   | 275 (259–292)                          | 1.3 (1.2–1.4)                                                            | 129.2 (121.6–137.3)                            | 16                |
| Colorado                                       | 313                         | 4,193             | 152                                                   | 43 (41–46)                             | 1.4 (1.3–1.5)                                                            | 138.6 (130.5–146.9)                            | 12                |
| Connecticut                                    | 198                         | 2,584             | 128                                                   | 26 (25–28)                             | 1.2 (1.1–1.3)                                                            | 133.2 (125.5–141.4)                            | 31                |
| Delaware                                       | 54                          | 725               | 122                                                   | 7 (7–8)                                | 1.1 (1.1–1.2)                                                            | 131.9 (123.6–140.6)                            | 35                |
| District of Columbia                           | 44                          | 575               | 220                                                   | 6 (5–6)                                | 1.9 (1.8–2.1)                                                            | 131.7 (123.9–140.1)                            | 1                 |
| Florida                                        | 1,423                       | 18,202            | 133                                                   | 176 (165–188)                          | 1.3 (1.2–1.4)                                                            | 123.8 (116.1–131.9)                            | 19                |
| Georgia                                        | 607                         | 8,087             | 169                                                   | 84 (79–89)                             | 1.6 (1.5–1.7)                                                            | 138.3 (130.4–146.7)                            | 5                 |
| Hawaii                                         | 73                          | 965               | 115                                                   | 10 (9–11)                              | 1.1 (1.0–1.2)                                                            | 136.5 (128.6–144.8)                            | 38                |
| Idaho                                          | 130                         | 1,581             | 172                                                   | 14 (13–15)                             | 1.4 (1.3–1.5)                                                            | 105.2 (97.8–112.9)                             | 15                |
| Illinois                                       | 774                         | 10,315            | 156                                                   | 111 (105–118)                          | 1.5 (1.4–1.6)                                                            | 143.7 (135.9–151.9)                            | 6                 |
| Indiana                                        | 391                         | 5,017             | 145                                                   | 50 (47–53)                             | 1.3 (1.2–1.4)                                                            | 127.5 (119.9–135.7)                            | 18                |
| Iowa                                           | 190                         | 2,377             | 135                                                   | 23 (22–25)                             | 1.2 (1.1–1.3)                                                            | 121.1 (113.7–129.0)                            | 29                |

| <b>(eTable 3)</b><br><b>State, sex,</b><br><b>cancer</b> | <b>No. of</b><br><b>cancer</b><br><b>deaths</b> | <b>Total</b><br><b>PYLL</b> | <b>Age-std.</b><br><b>PYLL rate,</b><br><b>per 10<sup>5</sup></b><br><b>persons</b> | <b>Total lost</b><br><b>earnings,</b><br><b>million \$</b> | <b>Age-std. lost</b><br><b>earning rate,</b><br><b>million \$ per</b><br><b>10<sup>5</sup> persons</b> | <b>Average lost</b><br><b>earnings,</b><br><b>\$1000 per</b><br><b>death</b> | <b>State</b><br><b>rank</b> |
|----------------------------------------------------------|-------------------------------------------------|-----------------------------|-------------------------------------------------------------------------------------|------------------------------------------------------------|--------------------------------------------------------------------------------------------------------|------------------------------------------------------------------------------|-----------------------------|
| Kansas                                                   | 175                                             | 2,227                       | 145                                                                                 | 21 (20–23)                                                 | 1.3 (1.2–1.4)                                                                                          | 120.7 (113.0–128.8)                                                          | 23                          |
| Kentucky                                                 | 271                                             | 3,384                       | 142                                                                                 | 31 (29–33)                                                 | 1.1 (1.1–1.2)                                                                                          | 112.8 (105.2–121.1)                                                          | 34                          |
| Louisiana                                                | 300                                             | 4,115                       | 168                                                                                 | 44 (41–46)                                                 | 1.6 (1.5–1.7)                                                                                          | 145.8 (137.6–154.5)                                                          | 3                           |
| Maine                                                    | 108                                             | 1,337                       | 150                                                                                 | 12 (11–13)                                                 | 1.3 (1.2–1.3)                                                                                          | 111.1 (103.6–118.8)                                                          | 25                          |
| Maryland                                                 | 382                                             | 4,972                       | 165                                                                                 | 50 (47–53)                                                 | 1.5 (1.4–1.6)                                                                                          | 131.1 (123.4–139.3)                                                          | 7                           |
| Massachusetts                                            | 359                                             | 4,332                       | 124                                                                                 | 37 (35–40)                                                 | 1.0 (0.9–1.1)                                                                                          | 104.0 (96.5–111.8)                                                           | 47                          |
| Michigan                                                 | 660                                             | 8,604                       | 150                                                                                 | 87 (82–92)                                                 | 1.4 (1.3–1.5)                                                                                          | 131.9 (124.2–140.1)                                                          | 13                          |
| Minnesota                                                | 328                                             | 3,916                       | 137                                                                                 | 35 (32–37)                                                 | 1.1 (1.0–1.2)                                                                                          | 105.8 (98.9–113.7)                                                           | 39                          |
| Mississippi                                              | 217                                             | 2,843                       | 182                                                                                 | 29 (27–31)                                                 | 1.7 (1.6–1.8)                                                                                          | 134.3 (126.6–142.5)                                                          | 2                           |
| Missouri                                                 | 347                                             | 4,621                       | 131                                                                                 | 47 (44–50)                                                 | 1.3 (1.2–1.3)                                                                                          | 136.0 (128.1–144.5)                                                          | 24                          |
| Montana                                                  | 79                                              | 971                         | 148                                                                                 | 8 (8–9)                                                    | 1.2 (1.1–1.3)                                                                                          | 103.5 (95.6–111.6)                                                           | 30                          |
| Nebraska                                                 | 94                                              | 1,082                       | 112                                                                                 | 9 (9–10)                                                   | 0.9 (0.8–1.0)                                                                                          | 100.0 (93.3–107.4)                                                           | 49                          |
| Nevada                                                   | 163                                             | 2,107                       | 131                                                                                 | 20 (19–22)                                                 | 1.2 (1.1–1.3)                                                                                          | 125.0 (117.2–133.3)                                                          | 32                          |
| New Hampshire                                            | 84                                              | 1,027                       | 129                                                                                 | 9 (9–10)                                                   | 1.0 (0.9–1.1)                                                                                          | 108.8 (101.4–116.6)                                                          | 45                          |
| New Jersey                                               | 478                                             | 6,027                       | 129                                                                                 | 55 (51–59)                                                 | 1.1 (1.0–1.1)                                                                                          | 114.5 (106.8–122.6)                                                          | 43                          |
| New Mexico                                               | 133                                             | 1,525                       | 134                                                                                 | 13 (12–14)                                                 | 1.1 (1.0–1.1)                                                                                          | 97.1 (90.1–104.6)                                                            | 42                          |
| New York                                                 | 1,077                                           | 13,658                      | 134                                                                                 | 135 (127–144)                                              | 1.2 (1.1–1.3)                                                                                          | 125.7 (118.3–133.7)                                                          | 28                          |
| North Carolina                                           | 625                                             | 8,086                       | 151                                                                                 | 80 (75–85)                                                 | 1.4 (1.3–1.5)                                                                                          | 128.4 (120.7–136.5)                                                          | 14                          |
| North Dakota                                             | 44                                              | 537                         | 136                                                                                 | 4 (4–5)                                                    | 1.0 (0.9–1.1)                                                                                          | 96.6 (88.7–104.6)                                                            | 46                          |
| Ohio                                                     | 736                                             | 9,166                       | 142                                                                                 | 86 (80–91)                                                 | 1.2 (1.1–1.3)                                                                                          | 116.3 (108.9–124.2)                                                          | 27                          |
| Oklahoma                                                 | 258                                             | 3,350                       | 157                                                                                 | 33 (31–35)                                                 | 1.4 (1.3–1.5)                                                                                          | 126.9 (119.1–135.2)                                                          | 9                           |
| Oregon                                                   | 299                                             | 3,739                       | 156                                                                                 | 34 (31–36)                                                 | 1.3 (1.2–1.4)                                                                                          | 112.5 (105.0–120.6)                                                          | 20                          |
| Pennsylvania                                             | 841                                             | 10,736                      | 141                                                                                 | 106 (100–113)                                              | 1.3 (1.2–1.4)                                                                                          | 126.2 (118.6–134.2)                                                          | 17                          |
| Rhode Island                                             | 66                                              | 771                         | 136                                                                                 | 7 (7–8)                                                    | 1.1 (1.0–1.2)                                                                                          | 109.0 (102.4–116.3)                                                          | 36                          |
| South Carolina                                           | 362                                             | 4,706                       | 163                                                                                 | 45 (42–48)                                                 | 1.4 (1.3–1.5)                                                                                          | 124.3 (116.4–132.6)                                                          | 8                           |

| <b>(eTable 3)</b><br><b>State, sex, cancer</b> | <b>No. of cancer deaths</b> | <b>Total PYLL</b> | <b>Age-std. PYLL rate, per 10<sup>5</sup> persons</b> | <b>Total lost earnings, million \$</b> | <b>Age-std. lost earning rate, million \$ per 10<sup>5</sup> persons</b> | <b>Average lost earnings, \$1000 per death</b> | <b>State rank</b> |
|------------------------------------------------|-----------------------------|-------------------|-------------------------------------------------------|----------------------------------------|--------------------------------------------------------------------------|------------------------------------------------|-------------------|
| South Dakota                                   | 63                          | 731               | 156                                                   | 6 (5–6)                                | 1.1 (1.0–1.2)                                                            | 87.7 (80.1–95.6)                               | 41                |
| Tennessee                                      | 432                         | 5,533             | 153                                                   | 54 (51–58)                             | 1.4 (1.3–1.5)                                                            | 126.0 (118.4–134.1)                            | 11                |
| Texas                                          | 1,289                       | 17,081            | 139                                                   | 178 (168–189)                          | 1.3 (1.2–1.4)                                                            | 138.1 (130.3–146.4)                            | 21                |
| Utah                                           | 117                         | 1,454             | 126                                                   | 13 (12–14)                             | 1.0 (0.9–1.1)                                                            | 112.3 (104.8–120.4)                            | 44                |
| Vermont                                        | 37                          | 432               | 114                                                   | 4 (4–4)                                | 1.0 (0.9–1.0)                                                            | 110.3 (103.9–117.4)                            | 48                |
| Virginia                                       | 471                         | 5,893             | 138                                                   | 54 (51–58)                             | 1.2 (1.1–1.2)                                                            | 115.5 (108.1–123.5)                            | 33                |
| Washington                                     | 437                         | 5,487             | 147                                                   | 52 (49–56)                             | 1.3 (1.2–1.4)                                                            | 120.1 (112.6–128.1)                            | 22                |
| West Virginia                                  | 108                         | 1,273             | 108                                                   | 11 (10–12)                             | 0.9 (0.8–0.9)                                                            | 103.6 (96.8–111.1)                             | 50                |
| Wisconsin                                      | 361                         | 4,297             | 133                                                   | 40 (38–43)                             | 1.1 (1.0–1.2)                                                            | 111.2 (104.5–118.6)                            | 37                |
| Wyoming                                        | 29                          | 345               | 109                                                   | 3 (3–3)                                | 0.8 (0.7–0.9)                                                            | 101.0 (93.9–108.5)                             | 51                |
| <b>United States</b>                           | <b>19,229</b>               | <b>245,960</b>    | <b>143</b>                                            | <b>2,407 (2,260–2,562)</b>             | <b>1.3 (1.2–1.4)</b>                                                     | <b>125.2 (117.6–133.3)</b>                     | –                 |
| <b>Pancreas (both sexes)</b>                   |                             |                   |                                                       |                                        |                                                                          |                                                |                   |
| Alabama                                        | 602                         | 10,885            | 180                                                   | 118 (114–121)                          | 2.1 (2.0–2.1)                                                            | 195.4 (189.7–201.6)                            | 5                 |
| Alaska                                         | 62                          | 1,082             | 145                                                   | 10 (9–10)                              | 1.1 (1.1–1.1)                                                            | 157.9 (152.8–163.4)                            | 49                |
| Arizona                                        | 744                         | 12,441            | 146                                                   | 125 (120–129)                          | 1.6 (1.5–1.6)                                                            | 167.7 (161.8–173.6)                            | 31                |
| Arkansas                                       | 325                         | 5,452             | 150                                                   | 60 (58–61)                             | 1.8 (1.7–1.8)                                                            | 183.1 (177.4–189.1)                            | 18                |
| California                                     | 3,498                       | 59,029            | 138                                                   | 590 (571–609)                          | 1.3 (1.3–1.4)                                                            | 168.6 (163.1–174.2)                            | 46                |
| Colorado                                       | 451                         | 7,757             | 126                                                   | 80 (78–83)                             | 1.2 (1.2–1.3)                                                            | 178.3 (172.3–184.4)                            | 48                |
| Connecticut                                    | 393                         | 6,527             | 144                                                   | 64 (62–67)                             | 1.4 (1.4–1.5)                                                            | 163.9 (158.4–169.5)                            | 44                |
| Delaware                                       | 126                         | 2,121             | 178                                                   | 20 (19–20)                             | 1.7 (1.7–1.8)                                                            | 155.4 (150.1–160.8)                            | 21                |
| District of Columbia                           | 78                          | 1,402             | 204                                                   | 15 (15–16)                             | 2.1 (2.0–2.2)                                                            | 193.5 (187.4–200.1)                            | 4                 |
| Florida                                        | 2,566                       | 41,406            | 146                                                   | 390 (376–404)                          | 1.5 (1.4–1.5)                                                            | 152.1 (146.6–157.6)                            | 38                |
| Georgia                                        | 1,008                       | 17,628            | 155                                                   | 181 (175–187)                          | 1.5 (1.5–1.6)                                                            | 179.7 (174.0–185.8)                            | 34                |
| Hawaii                                         | 167                         | 2,895             | 163                                                   | 29 (28–30)                             | 1.7 (1.6–1.7)                                                            | 174.2 (168.7–179.9)                            | 23                |
| Idaho                                          | 187                         | 3,022             | 153                                                   | 30 (29–31)                             | 1.6 (1.5–1.6)                                                            | 161.9 (155.6–168.2)                            | 32                |



| <b>(eTable 3)</b><br><b>State, sex,</b><br><b>cancer</b> | <b>No. of</b><br><b>cancer</b><br><b>deaths</b> | <b>Total</b><br><b>PYLL</b> | <b>Age-std.</b><br><b>PYLL rate,</b><br><b>per 10<sup>5</sup></b><br><b>persons</b> | <b>Total lost</b><br><b>earnings,</b><br><b>million \$</b> | <b>Age-std. lost</b><br><b>earning rate,</b><br><b>million \$ per</b><br><b>10<sup>5</sup> persons</b> | <b>Average lost</b><br><b>earnings,</b><br><b>\$1000 per</b><br><b>death</b> | <b>State</b><br><b>rank</b> |
|----------------------------------------------------------|-------------------------------------------------|-----------------------------|-------------------------------------------------------------------------------------|------------------------------------------------------------|--------------------------------------------------------------------------------------------------------|------------------------------------------------------------------------------|-----------------------------|
| Illinois                                                 | 1,365                                           | 23,263                      | 155                                                                                 | 243 (235–251)                                              | 1.6 (1.6–1.7)                                                                                          | 177.9 (172.1–183.8)                                                          | 29                          |
| Indiana                                                  | 735                                             | 13,142                      | 167                                                                                 | 148 (143–152)                                              | 1.9 (1.9–2.0)                                                                                          | 201.1 (195.1–207.4)                                                          | 6                           |
| Iowa                                                     | 360                                             | 6,035                       | 160                                                                                 | 63 (61–65)                                                 | 1.8 (1.7–1.8)                                                                                          | 174.7 (169.1–180.5)                                                          | 19                          |
| Kansas                                                   | 341                                             | 5,809                       | 174                                                                                 | 60 (58–62)                                                 | 1.9 (1.8–1.9)                                                                                          | 176.9 (171.3–182.9)                                                          | 10                          |
| Kentucky                                                 | 520                                             | 9,174                       | 167                                                                                 | 94 (91–97)                                                 | 1.7 (1.7–1.8)                                                                                          | 180.0 (174.4–185.8)                                                          | 22                          |
| Louisiana                                                | 596                                             | 10,559                      | 195                                                                                 | 115 (111–118)                                              | 2.2 (2.1–2.2)                                                                                          | 192.7 (186.9–198.7)                                                          | 3                           |
| Maine                                                    | 204                                             | 3,269                       | 171                                                                                 | 28 (27–29)                                                 | 1.5 (1.5–1.6)                                                                                          | 138.2 (133.3–143.2)                                                          | 35                          |
| Maryland                                                 | 670                                             | 11,721                      | 165                                                                                 | 121 (117–125)                                              | 1.7 (1.6–1.7)                                                                                          | 180.6 (175.0–186.4)                                                          | 24                          |
| Massachusetts                                            | 769                                             | 12,741                      | 153                                                                                 | 123 (119–128)                                              | 1.5 (1.4–1.5)                                                                                          | 160.6 (155.4–165.8)                                                          | 40                          |
| Michigan                                                 | 1,288                                           | 21,924                      | 173                                                                                 | 221 (213–228)                                              | 1.8 (1.7–1.8)                                                                                          | 171.3 (165.6–177.0)                                                          | 16                          |
| Minnesota                                                | 603                                             | 10,145                      | 156                                                                                 | 106 (103–110)                                              | 1.6 (1.6–1.7)                                                                                          | 176.4 (170.9–182.1)                                                          | 28                          |
| Mississippi                                              | 401                                             | 7,092                       | 207                                                                                 | 82 (79–84)                                                 | 2.5 (2.5–2.6)                                                                                          | 204.0 (198.3–210.1)                                                          | 2                           |
| Missouri                                                 | 702                                             | 12,224                      | 161                                                                                 | 133 (128–137)                                              | 1.8 (1.7–1.9)                                                                                          | 188.8 (182.8–195.1)                                                          | 14                          |
| Montana                                                  | 121                                             | 1,885                       | 130                                                                                 | 15 (14–16)                                                 | 1.0 (1.0–1.0)                                                                                          | 124.2 (118.6–129.4)                                                          | 51                          |
| Nebraska                                                 | 169                                             | 2,865                       | 135                                                                                 | 29 (28–30)                                                 | 1.4 (1.3–1.4)                                                                                          | 170.4 (164.9–176.2)                                                          | 45                          |
| Nevada                                                   | 311                                             | 5,460                       | 158                                                                                 | 59 (57–61)                                                 | 1.8 (1.7–1.8)                                                                                          | 190.9 (184.8–197.3)                                                          | 15                          |
| New Hampshire                                            | 154                                             | 2,681                       | 155                                                                                 | 31 (30–32)                                                 | 1.9 (1.8–1.9)                                                                                          | 198.7 (192.2–205.3)                                                          | 9                           |
| New Jersey                                               | 1,013                                           | 16,701                      | 154                                                                                 | 162 (156–167)                                              | 1.5 (1.4–1.5)                                                                                          | 159.7 (154.4–165.1)                                                          | 43                          |
| New Mexico                                               | 225                                             | 3,658                       | 136                                                                                 | 34 (33–35)                                                 | 1.3 (1.2–1.3)                                                                                          | 150.5 (145.0–156.1)                                                          | 47                          |
| New York                                                 | 2,057                                           | 34,526                      | 146                                                                                 | 351 (339–362)                                              | 1.5 (1.4–1.5)                                                                                          | 170.4 (164.9–176.1)                                                          | 37                          |
| North Carolina                                           | 1,144                                           | 19,828                      | 164                                                                                 | 208 (202–215)                                              | 1.8 (1.7–1.8)                                                                                          | 182.1 (176.4–188.1)                                                          | 17                          |
| North Dakota                                             | 78                                              | 1,352                       | 164                                                                                 | 15 (14–15)                                                 | 1.8 (1.8–1.9)                                                                                          | 189.7 (183.9–195.7)                                                          | 12                          |
| Ohio                                                     | 1,486                                           | 25,060                      | 172                                                                                 | 245 (237–253)                                              | 1.7 (1.7–1.8)                                                                                          | 164.6 (159.4–170.1)                                                          | 20                          |
| Oklahoma                                                 | 431                                             | 7,284                       | 157                                                                                 | 75 (73–78)                                                 | 1.7 (1.6–1.7)                                                                                          | 174.0 (168.3–179.9)                                                          | 25                          |
| Oregon                                                   | 537                                             | 8,953                       | 173                                                                                 | 89 (86–92)                                                 | 1.8 (1.8–1.9)                                                                                          | 165.9 (160.1–171.8)                                                          | 13                          |

| <b>(eTable 3)</b><br><b>State, sex, cancer</b> | <b>No. of cancer deaths</b> | <b>Total PYLL</b> | <b>Age-std. PYLL rate, per 10<sup>5</sup> persons</b> | <b>Total lost earnings, million \$</b> | <b>Age-std. lost earning rate, million \$ per 10<sup>5</sup> persons</b> | <b>Average lost earnings, \$1000 per death</b> | <b>State rank</b> |
|------------------------------------------------|-----------------------------|-------------------|-------------------------------------------------------|----------------------------------------|--------------------------------------------------------------------------|------------------------------------------------|-------------------|
| Pennsylvania                                   | 1,755                       | 29,706            | 177                                                   | 308 (298–318)                          | 1.9 (1.9–2.0)                                                            | 175.4 (169.9–181.2)                            | 8                 |
| Rhode Island                                   | 123                         | 1,903             | 150                                                   | 18 (18–19)                             | 1.5 (1.4–1.5)                                                            | 147.8 (142.9–152.9)                            | 41                |
| South Carolina                                 | 594                         | 10,265            | 167                                                   | 110 (106–113)                          | 1.9 (1.8–1.9)                                                            | 184.6 (178.8–190.6)                            | 11                |
| South Dakota                                   | 88                          | 1,478             | 144                                                   | 16 (16–17)                             | 1.6 (1.6–1.7)                                                            | 183.3 (177.4–189.4)                            | 27                |
| Tennessee                                      | 773                         | 13,630            | 165                                                   | 154 (149–159)                          | 1.9 (1.9–2.0)                                                            | 199.0 (192.5–205.5)                            | 7                 |
| Texas                                          | 2,290                       | 39,937            | 143                                                   | 424 (411–437)                          | 1.5 (1.4–1.5)                                                            | 185.0 (179.3–190.9)                            | 42                |
| Utah                                           | 187                         | 2,978             | 113                                                   | 28 (27–29)                             | 1.0 (1.0–1.0)                                                            | 150.2 (144.4–155.9)                            | 50                |
| Vermont                                        | 76                          | 1,257             | 139                                                   | 13 (13–14)                             | 1.5 (1.5–1.6)                                                            | 172.0 (165.7–178.4)                            | 33                |
| Virginia                                       | 882                         | 15,249            | 155                                                   | 157 (152–162)                          | 1.6 (1.6–1.7)                                                            | 178.1 (172.7–183.8)                            | 30                |
| Washington                                     | 741                         | 12,598            | 148                                                   | 127 (123–132)                          | 1.5 (1.4–1.5)                                                            | 171.8 (165.7–177.8)                            | 39                |
| West Virginia                                  | 257                         | 4,842             | 196                                                   | 56 (55–58)                             | 2.5 (2.5–2.6)                                                            | 218.2 (212.2–224.6)                            | 1                 |
| Wisconsin                                      | 691                         | 11,539            | 159                                                   | 118 (114–122)                          | 1.6 (1.6–1.7)                                                            | 171.1 (165.5–176.9)                            | 26                |
| Wyoming                                        | 57                          | 950               | 137                                                   | 10 (10–11)                             | 1.5 (1.5–1.6)                                                            | 181.6 (175.0–188.1)                            | 36                |
| <b>United States</b>                           | <b>35,001</b>               | <b>595,333</b>    | <b>155</b>                                            | <b>6,099 (5,903–6,303)</b>             | <b>1.6 (1.6–1.7)</b>                                                     | <b>174.3 (168.6–180.1)</b>                     | –                 |
| <b>Pancreas (men)</b>                          |                             |                   |                                                       |                                        |                                                                          |                                                |                   |
| Alabama                                        | 322                         | 5,456             | 193                                                   | 81 (78–84)                             | 2.9 (2.8–3.1)                                                            | 251.1 (240.9–261.8)                            | 11                |
| Alaska                                         | 29                          | 466               | 124                                                   | 6 (6–7)                                | 1.4 (1.4–1.5)                                                            | 220.7 (211.3–231.1)                            | 51                |
| Arizona                                        | 421                         | 6,894             | 171                                                   | 96 (92–101)                            | 2.5 (2.4–2.6)                                                            | 228.4 (218.6–238.9)                            | 28                |
| Arkansas                                       | 186                         | 3,110             | 184                                                   | 47 (45–49)                             | 2.9 (2.8–3.0)                                                            | 253.8 (244.4–264.0)                            | 12                |
| California                                     | 1,862                       | 30,230            | 149                                                   | 430 (412–449)                          | 2.0 (1.9–2.1)                                                            | 230.8 (221.4–241.2)                            | 45                |
| Colorado                                       | 258                         | 4,287             | 140                                                   | 60 (57–62)                             | 1.8 (1.8–1.9)                                                            | 230.7 (220.7–241.6)                            | 48                |
| Connecticut                                    | 202                         | 3,355             | 153                                                   | 47 (45–49)                             | 2.1 (2.0–2.2)                                                            | 232.8 (222.9–243.7)                            | 44                |
| Delaware                                       | 65                          | 994               | 170                                                   | 13 (12–13)                             | 2.1 (2.0–2.2)                                                            | 196.8 (187.7–206.8)                            | 42                |
| District of Columbia                           | 44                          | 769               | 248                                                   | 12 (11–12)                             | 3.5 (3.4–3.7)                                                            | 265.8 (255.5–276.7)                            | 3                 |
| Florida                                        | 1,415                       | 21,943            | 163                                                   | 286 (273–300)                          | 2.3 (2.2–2.4)                                                            | 202.4 (193.2–212.3)                            | 37                |

| <b>(eTable 3)</b><br><b>State, sex, cancer</b> | <b>No. of cancer deaths</b> | <b>Total PYLL</b> | <b>Age-std. PYLL rate, per 10<sup>5</sup> persons</b> | <b>Total lost earnings, million \$</b> | <b>Age-std. lost earning rate, million \$ per 10<sup>5</sup> persons</b> | <b>Average lost earnings, \$1000 per death</b> | <b>State rank</b> |
|------------------------------------------------|-----------------------------|-------------------|-------------------------------------------------------|----------------------------------------|--------------------------------------------------------------------------|------------------------------------------------|-------------------|
| Georgia                                        | 542                         | 9,064             | 170                                                   | 130 (124–135)                          | 2.3 (2.2–2.4)                                                            | 239.1 (229.1–249.9)                            | 36                |
| Hawaii                                         | 86                          | 1,444             | 165                                                   | 21 (20–22)                             | 2.4 (2.3–2.5)                                                            | 241.4 (231.4–252.3)                            | 32                |
| Idaho                                          | 119                         | 1,871             | 196                                                   | 25 (24–26)                             | 2.6 (2.5–2.7)                                                            | 207.7 (198.3–217.9)                            | 23                |
| Illinois                                       | 757                         | 12,556            | 179                                                   | 184 (176–192)                          | 2.5 (2.4–2.6)                                                            | 242.6 (232.9–253.1)                            | 27                |
| Indiana                                        | 406                         | 7,148             | 194                                                   | 113 (109–117)                          | 3.1 (3.0–3.2)                                                            | 277.6 (267.3–288.8)                            | 7                 |
| Iowa                                           | 197                         | 3,298             | 182                                                   | 49 (47–51)                             | 2.8 (2.7–2.9)                                                            | 249.5 (239.9–260.2)                            | 14                |
| Kansas                                         | 183                         | 3,105             | 194                                                   | 46 (45–48)                             | 3.0 (2.9–3.1)                                                            | 253.5 (243.6–264.4)                            | 9                 |
| Kentucky                                       | 268                         | 4,493             | 171                                                   | 64 (62–67)                             | 2.4 (2.3–2.5)                                                            | 240.4 (230.5–251.3)                            | 33                |
| Louisiana                                      | 317                         | 5,339             | 209                                                   | 80 (77–83)                             | 3.1 (3.0–3.2)                                                            | 251.4 (241.6–262.2)                            | 8                 |
| Maine                                          | 102                         | 1,533             | 168                                                   | 19 (18–20)                             | 2.1 (2.0–2.2)                                                            | 187.5 (178.4–197.0)                            | 43                |
| Maryland                                       | 343                         | 5,876             | 176                                                   | 87 (84–91)                             | 2.5 (2.4–2.7)                                                            | 254.4 (244.3–265.5)                            | 26                |
| Massachusetts                                  | 384                         | 6,231             | 161                                                   | 90 (86–94)                             | 2.2 (2.1–2.3)                                                            | 234.6 (225.3–244.9)                            | 38                |
| Michigan                                       | 681                         | 11,342            | 189                                                   | 164 (157–171)                          | 2.7 (2.6–2.9)                                                            | 241.1 (231.3–251.8)                            | 18                |
| Minnesota                                      | 324                         | 5,470             | 173                                                   | 82 (79–86)                             | 2.6 (2.5–2.7)                                                            | 254.1 (244.4–264.9)                            | 25                |
| Mississippi                                    | 224                         | 3,839             | 244                                                   | 62 (60–64)                             | 4.0 (3.9–4.1)                                                            | 275.5 (266.0–286.2)                            | 1                 |
| Missouri                                       | 386                         | 6,620             | 182                                                   | 98 (94–102)                            | 2.7 (2.6–2.9)                                                            | 254.3 (244.3–265.4)                            | 17                |
| Montana                                        | 66                          | 984               | 136                                                   | 11 (10–12)                             | 1.4 (1.4–1.5)                                                            | 166.8 (157.4–176.6)                            | 50                |
| Nebraska                                       | 91                          | 1,455             | 142                                                   | 20 (19–21)                             | 1.9 (1.8–2.0)                                                            | 220.3 (210.9–230.6)                            | 47                |
| Nevada                                         | 184                         | 3,079             | 184                                                   | 46 (44–47)                             | 2.8 (2.7–2.9)                                                            | 247.3 (237.6–258.0)                            | 16                |
| New Hampshire                                  | 93                          | 1,659             | 199                                                   | 26 (25–27)                             | 3.3 (3.2–3.4)                                                            | 280.0 (269.5–291.2)                            | 4                 |
| New Jersey                                     | 516                         | 8,342             | 165                                                   | 117 (112–123)                          | 2.2 (2.1–2.3)                                                            | 227.0 (217.5–237.4)                            | 39                |
| New Mexico                                     | 121                         | 1,929             | 149                                                   | 26 (24–27)                             | 2.0 (1.9–2.1)                                                            | 210.9 (201.4–221.2)                            | 46                |
| New York                                       | 1,093                       | 18,109            | 165                                                   | 263 (253–275)                          | 2.3 (2.3–2.5)                                                            | 240.8 (231.1–251.4)                            | 35                |
| North Carolina                                 | 624                         | 10,381            | 185                                                   | 152 (146–159)                          | 2.7 (2.6–2.8)                                                            | 244.3 (234.6–254.9)                            | 19                |
| North Dakota                                   | 43                          | 719               | 176                                                   | 11 (10–11)                             | 2.6 (2.5–2.7)                                                            | 248.1 (238.4–258.9)                            | 24                |

| <b>(eTable 3)</b><br><b>State, sex,</b><br><b>cancer</b> | <b>No. of</b><br><b>cancer</b><br><b>deaths</b> | <b>Total</b><br><b>PYLL</b> | <b>Age-std.</b><br><b>PYLL rate,</b><br><b>per 10<sup>5</sup></b><br><b>persons</b> | <b>Total lost</b><br><b>earnings,</b><br><b>million \$</b> | <b>Age-std. lost</b><br><b>earning rate,</b><br><b>million \$ per</b><br><b>10<sup>5</sup> persons</b> | <b>Average lost</b><br><b>earnings,</b><br><b>\$1000 per</b><br><b>death</b> | <b>State</b><br><b>rank</b> |
|----------------------------------------------------------|-------------------------------------------------|-----------------------------|-------------------------------------------------------------------------------------|------------------------------------------------------------|--------------------------------------------------------------------------------------------------------|------------------------------------------------------------------------------|-----------------------------|
| Ohio                                                     | 763                                             | 12,278                      | 179                                                                                 | 171 (164–179)                                              | 2.5 (2.4–2.6)                                                                                          | 224.6 (215.3–234.9)                                                          | 29                          |
| Oklahoma                                                 | 235                                             | 3,934                       | 179                                                                                 | 57 (55–60)                                                 | 2.6 (2.5–2.7)                                                                                          | 243.7 (233.8–254.4)                                                          | 21                          |
| Oregon                                                   | 301                                             | 4,885                       | 200                                                                                 | 68 (65–71)                                                 | 2.9 (2.8–3.0)                                                                                          | 225.0 (215.4–235.5)                                                          | 13                          |
| Pennsylvania                                             | 946                                             | 15,945                      | 203                                                                                 | 237 (228–247)                                              | 3.1 (3.0–3.2)                                                                                          | 250.5 (240.8–261.2)                                                          | 6                           |
| Rhode Island                                             | 61                                              | 983                         | 170                                                                                 | 14 (14–15)                                                 | 2.5 (2.4–2.6)                                                                                          | 237.7 (228.8–247.8)                                                          | 30                          |
| South Carolina                                           | 323                                             | 5,441                       | 191                                                                                 | 82 (79–85)                                                 | 3.0 (2.8–3.1)                                                                                          | 253.3 (243.6–264.2)                                                          | 10                          |
| South Dakota                                             | 48                                              | 826                         | 166                                                                                 | 13 (12–13)                                                 | 2.6 (2.5–2.7)                                                                                          | 262.7 (252.6–273.8)                                                          | 22                          |
| Tennessee                                                | 457                                             | 8,090                       | 205                                                                                 | 122 (118–128)                                              | 3.2 (3.1–3.3)                                                                                          | 268.0 (257.6–279.4)                                                          | 5                           |
| Texas                                                    | 1,247                                           | 20,903                      | 157                                                                                 | 310 (298–323)                                              | 2.2 (2.1–2.3)                                                                                          | 248.4 (238.6–259.2)                                                          | 40                          |
| Utah                                                     | 104                                             | 1,666                       | 128                                                                                 | 22 (21–23)                                                 | 1.6 (1.5–1.7)                                                                                          | 211.9 (202.3–222.4)                                                          | 49                          |
| Vermont                                                  | 45                                              | 766                         | 180                                                                                 | 11 (11–12)                                                 | 2.8 (2.7–2.9)                                                                                          | 247.2 (237.1–258.2)                                                          | 15                          |
| Virginia                                                 | 463                                             | 7,619                       | 166                                                                                 | 111 (107–116)                                              | 2.4 (2.3–2.5)                                                                                          | 239.6 (230.1–250.1)                                                          | 34                          |
| Washington                                               | 433                                             | 6,952                       | 168                                                                                 | 94 (90–98)                                                 | 2.2 (2.1–2.3)                                                                                          | 216.9 (207.4–227.1)                                                          | 41                          |
| West Virginia                                            | 133                                             | 2,499                       | 207                                                                                 | 41 (39–42)                                                 | 3.7 (3.6–3.9)                                                                                          | 306.9 (295.9–318.2)                                                          | 2                           |
| Wisconsin                                                | 376                                             | 6,223                       | 179                                                                                 | 92 (88–96)                                                 | 2.6 (2.5–2.8)                                                                                          | 244.3 (234.9–254.9)                                                          | 20                          |
| Wyoming                                                  | 35                                              | 592                         | 164                                                                                 | 9 (8–9)                                                    | 2.5 (2.4–2.6)                                                                                          | 244.8 (234.6–255.9)                                                          | 31                          |
| <b>United States</b>                                     | <b>18,924</b>                                   | <b>312,990</b>              | <b>172</b>                                                                          | <b>4,517 (4,333–4,718)</b>                                 | <b>2.5 (2.4–2.6)</b>                                                                                   | <b>238.7 (229.0–249.3)</b>                                                   | –                           |
| <b>Pancreas</b><br><b>(women)</b>                        |                                                 |                             |                                                                                     |                                                            |                                                                                                        |                                                                              |                             |
| Alabama                                                  | 280                                             | 5,429                       | 169                                                                                 | 37 (36–38)                                                 | 1.2 (1.2–1.3)                                                                                          | 131.4 (127.4–135.6)                                                          | 3                           |
| Alaska                                                   | 33                                              | 616                         | 167                                                                                 | 3 (3–4)                                                    | 0.8 (0.7–0.8)                                                                                          | 102.6 (98.6–106.8)                                                           | 31                          |
| Arizona                                                  | 323                                             | 5,547                       | 124                                                                                 | 29 (27–30)                                                 | 0.7 (0.7–0.7)                                                                                          | 88.3 (84.9–91.8)                                                             | 37                          |
| Arkansas                                                 | 139                                             | 2,342                       | 117                                                                                 | 12 (12–13)                                                 | 0.7 (0.6–0.7)                                                                                          | 88.3 (85.1–91.8)                                                             | 42                          |
| California                                               | 1,636                                           | 28,799                      | 127                                                                                 | 160 (154–166)                                              | 0.7 (0.7–0.7)                                                                                          | 97.5 (94.1–101.2)                                                            | 39                          |
| Colorado                                                 | 193                                             | 3,470                       | 112                                                                                 | 21 (20–22)                                                 | 0.7 (0.7–0.7)                                                                                          | 108.0 (104.5–111.6)                                                          | 41                          |
| Connecticut                                              | 191                                             | 3,172                       | 135                                                                                 | 17 (17–18)                                                 | 0.8 (0.7–0.8)                                                                                          | 90.8 (87.7–94.1)                                                             | 29                          |

| <b>(eTable 3)</b><br><b>State, sex, cancer</b> | <b>No. of cancer deaths</b> | <b>Total PYLL</b> | <b>Age-std. PYLL rate, per 10<sup>5</sup> persons</b> | <b>Total lost earnings, million \$</b> | <b>Age-std. lost earning rate, million \$ per 10<sup>5</sup> persons</b> | <b>Average lost earnings, \$1000 per death</b> | <b>State rank</b> |
|------------------------------------------------|-----------------------------|-------------------|-------------------------------------------------------|----------------------------------------|--------------------------------------------------------------------------|------------------------------------------------|-------------------|
| Delaware                                       | 61                          | 1,127             | 175                                                   | 7 (7–7)                                | 1.2 (1.1–1.2)                                                            | 111.0 (107.2–114.9)                            | 5                 |
| District of Columbia                           | 34                          | 632               | 166                                                   | 3 (3–4)                                | 0.9 (0.8–0.9)                                                            | 99.8 (95.7–104.0)                              | 17                |
| Florida                                        | 1,151                       | 19,463            | 131                                                   | 104 (100–108)                          | 0.8 (0.8–0.8)                                                            | 90.1 (86.9–93.6)                               | 26                |
| Georgia                                        | 466                         | 8,564             | 142                                                   | 52 (50–53)                             | 0.9 (0.8–0.9)                                                            | 110.6 (106.9–114.5)                            | 20                |
| Hawaii                                         | 81                          | 1,451             | 160                                                   | 8 (8–9)                                | 1.0 (1.0–1.0)                                                            | 102.7 (99.3–106.4)                             | 9                 |
| Idaho                                          | 68                          | 1,151             | 112                                                   | 6 (5–6)                                | 0.6 (0.5–0.6)                                                            | 81.3 (78.0–84.9)                               | 45                |
| Illinois                                       | 608                         | 10,708            | 133                                                   | 59 (57–61)                             | 0.7 (0.7–0.8)                                                            | 97.1 (93.6–100.8)                              | 35                |
| Indiana                                        | 329                         | 5,994             | 143                                                   | 35 (34–36)                             | 0.9 (0.8–0.9)                                                            | 106.6 (103.0–110.6)                            | 18                |
| Iowa                                           | 163                         | 2,737             | 139                                                   | 14 (13–14)                             | 0.8 (0.7–0.8)                                                            | 84.0 (80.9–87.5)                               | 34                |
| Kansas                                         | 158                         | 2,704             | 154                                                   | 14 (13–14)                             | 0.8 (0.8–0.9)                                                            | 88.0 (84.7–91.5)                               | 21                |
| Kentucky                                       | 252                         | 4,681             | 163                                                   | 29 (28–30)                             | 1.1 (1.0–1.1)                                                            | 115.7 (111.9–119.6)                            | 6                 |
| Louisiana                                      | 279                         | 5,221             | 184                                                   | 35 (34–36)                             | 1.3 (1.3–1.4)                                                            | 126.0 (122.1–129.9)                            | 2                 |
| Maine                                          | 102                         | 1,736             | 173                                                   | 9 (9–9)                                | 1.0 (1.0–1.0)                                                            | 88.7 (85.4–92.2)                               | 10                |
| Maryland                                       | 327                         | 5,846             | 156                                                   | 34 (33–35)                             | 0.9 (0.9–0.9)                                                            | 103.0 (99.4–106.6)                             | 11                |
| Massachusetts                                  | 385                         | 6,510             | 146                                                   | 33 (32–35)                             | 0.8 (0.7–0.8)                                                            | 86.6 (83.3–90.0)                               | 30                |
| Michigan                                       | 607                         | 10,582            | 157                                                   | 56 (54–59)                             | 0.9 (0.8–0.9)                                                            | 92.8 (89.4–96.4)                               | 19                |
| Minnesota                                      | 279                         | 4,676             | 139                                                   | 24 (23–25)                             | 0.7 (0.7–0.8)                                                            | 86.0 (82.9–89.4)                               | 36                |
| Mississippi                                    | 177                         | 3,253             | 176                                                   | 20 (19–21)                             | 1.2 (1.2–1.2)                                                            | 113.4 (109.8–117.1)                            | 4                 |
| Missouri                                       | 316                         | 5,605             | 141                                                   | 34 (33–36)                             | 0.9 (0.9–0.9)                                                            | 108.7 (105.2–112.4)                            | 12                |
| Montana                                        | 55                          | 900               | 125                                                   | 4 (4–4)                                | 0.6 (0.5–0.6)                                                            | 72.9 (69.7–76.3)                               | 46                |
| Nebraska                                       | 78                          | 1,410             | 129                                                   | 9 (8–9)                                | 0.9 (0.9–0.9)                                                            | 112.1 (108.6–115.9)                            | 16                |
| Nevada                                         | 127                         | 2,381             | 133                                                   | 14 (13–14)                             | 0.8 (0.8–0.8)                                                            | 109.0 (105.1–112.9)                            | 23                |
| New Hampshire                                  | 61                          | 1,022             | 113                                                   | 5 (4–5)                                | 0.5 (0.5–0.5)                                                            | 74.6 (71.4–78.1)                               | 49                |
| New Jersey                                     | 497                         | 8,359             | 143                                                   | 45 (43–46)                             | 0.8 (0.7–0.8)                                                            | 89.7 (86.5–93.2)                               | 28                |
| New Mexico                                     | 104                         | 1,729             | 123                                                   | 8 (8–9)                                | 0.6 (0.6–0.6)                                                            | 80.0 (76.8–83.4)                               | 44                |

| <b>(eTable 3)</b><br><b>State, sex,</b><br><b>cancer</b> | <b>No. of</b><br><b>cancer</b><br><b>deaths</b> | <b>Total</b><br><b>PYLL</b> | <b>Age-std.</b><br><b>PYLL rate,</b><br><b>per 10<sup>5</sup></b><br><b>persons</b> | <b>Total lost</b><br><b>earnings,</b><br><b>million \$</b> | <b>Age-std. lost</b><br><b>earning rate,</b><br><b>million \$ per</b><br><b>10<sup>5</sup> persons</b> | <b>Average lost</b><br><b>earnings,</b><br><b>\$1000 per</b><br><b>death</b> | <b>State</b><br><b>rank</b> |
|----------------------------------------------------------|-------------------------------------------------|-----------------------------|-------------------------------------------------------------------------------------|------------------------------------------------------------|--------------------------------------------------------------------------------------------------------|------------------------------------------------------------------------------|-----------------------------|
| New York                                                 | 964                                             | 16,417                      | 129                                                                                 | 87 (84–91)                                                 | 0.7 (0.7–0.7)                                                                                          | 90.4 (87.1–93.9)                                                             | 38                          |
| North Carolina                                           | 520                                             | 9,447                       | 145                                                                                 | 56 (54–58)                                                 | 0.9 (0.9–0.9)                                                                                          | 107.4 (103.8–111.3)                                                          | 15                          |
| North Dakota                                             | 35                                              | 633                         | 151                                                                                 | 4 (4–4)                                                    | 1.0 (1.0–1.1)                                                                                          | 117.7 (114.1–121.6)                                                          | 7                           |
| Ohio                                                     | 723                                             | 12,782                      | 165                                                                                 | 73 (71–76)                                                 | 1.0 (1.0–1.1)                                                                                          | 101.1 (97.6–104.7)                                                           | 8                           |
| Oklahoma                                                 | 196                                             | 3,350                       | 135                                                                                 | 18 (17–18)                                                 | 0.8 (0.7–0.8)                                                                                          | 90.4 (87.1–93.9)                                                             | 33                          |
| Oregon                                                   | 236                                             | 4,068                       | 147                                                                                 | 21 (21–22)                                                 | 0.8 (0.8–0.8)                                                                                          | 90.3 (86.9–93.9)                                                             | 24                          |
| Pennsylvania                                             | 809                                             | 13,761                      | 152                                                                                 | 71 (68–74)                                                 | 0.8 (0.8–0.9)                                                                                          | 87.4 (84.1–90.9)                                                             | 22                          |
| Rhode Island                                             | 62                                              | 920                         | 131                                                                                 | 4 (3–4)                                                    | 0.5 (0.5–0.5)                                                                                          | 59.1 (56.4–62.0)                                                             | 47                          |
| South Carolina                                           | 271                                             | 4,823                       | 145                                                                                 | 28 (27–29)                                                 | 0.9 (0.9–0.9)                                                                                          | 102.4 (99.0–106.1)                                                           | 13                          |
| South Dakota                                             | 40                                              | 652                         | 119                                                                                 | 4 (3–4)                                                    | 0.6 (0.6–0.7)                                                                                          | 87.7 (84.6–91.3)                                                             | 43                          |
| Tennessee                                                | 316                                             | 5,540                       | 129                                                                                 | 31 (30–32)                                                 | 0.8 (0.8–0.8)                                                                                          | 98.9 (95.5–102.6)                                                            | 27                          |
| Texas                                                    | 1,043                                           | 19,035                      | 130                                                                                 | 114 (110–118)                                              | 0.8 (0.7–0.8)                                                                                          | 109.0 (105.3–112.8)                                                          | 32                          |
| Utah                                                     | 83                                              | 1,312                       | 99                                                                                  | 6 (6–6)                                                    | 0.4 (0.4–0.5)                                                                                          | 72.5 (69.5–75.6)                                                             | 50                          |
| Vermont                                                  | 31                                              | 491                         | 100                                                                                 | 2 (2–2)                                                    | 0.4 (0.3–0.4)                                                                                          | 62.5 (59.5–65.7)                                                             | 51                          |
| Virginia                                                 | 419                                             | 7,630                       | 145                                                                                 | 46 (45–48)                                                 | 0.9 (0.9–0.9)                                                                                          | 110.1 (106.4–114.0)                                                          | 14                          |
| Washington                                               | 308                                             | 5,646                       | 129                                                                                 | 33 (32–34)                                                 | 0.8 (0.8–0.8)                                                                                          | 108.1 (104.5–111.8)                                                          | 25                          |
| West Virginia                                            | 124                                             | 2,343                       | 184                                                                                 | 15 (15–16)                                                 | 1.4 (1.3–1.4)                                                                                          | 123.1 (119.3–127.0)                                                          | 1                           |
| Wisconsin                                                | 315                                             | 5,317                       | 139                                                                                 | 26 (25–27)                                                 | 0.7 (0.7–0.7)                                                                                          | 83.4 (80.1–86.9)                                                             | 40                          |
| Wyoming                                                  | 22                                              | 358                         | 107                                                                                 | 2 (2–2)                                                    | 0.5 (0.5–0.5)                                                                                          | 80.5 (77.4–84.0)                                                             | 48                          |
| <b>United States</b>                                     | <b>16,077</b>                                   | <b>282,343</b>              | <b>139</b>                                                                          | <b>1,579 (1,525–1,637)</b>                                 | <b>0.8 (0.8–0.8)</b>                                                                                   | <b>98.2 (94.8–101.9)</b>                                                     | –                           |
| <b>Ovary</b>                                             |                                                 |                             |                                                                                     |                                                            |                                                                                                        |                                                                              |                             |
| Alabama                                                  | 185                                             | 3,413                       | 104                                                                                 | 21 (20–21)                                                 | 0.7 (0.6–0.7)                                                                                          | 111.1 (107.4–115.0)                                                          | 47                          |
| Alaska                                                   | 23                                              | 478                         | 119                                                                                 | 3 (3–3)                                                    | 0.8 (0.7–0.8)                                                                                          | 140.0 (135.3–144.9)                                                          | 41                          |
| Arizona                                                  | 270                                             | 5,248                       | 122                                                                                 | 34 (33–35)                                                 | 0.9 (0.9–0.9)                                                                                          | 126.5 (122.4–130.5)                                                          | 23                          |
| Arkansas                                                 | 130                                             | 2,440                       | 139                                                                                 | 17 (17–18)                                                 | 1.1 (1.1–1.2)                                                                                          | 131.9 (128.1–135.7)                                                          | 7                           |

| <b>(eTable 3)</b><br><b>State, sex, cancer</b> | <b>No. of cancer deaths</b> | <b>Total PYLL</b> | <b>Age-std. PYLL rate, per 10<sup>5</sup> persons</b> | <b>Total lost earnings, million \$</b> | <b>Age-std. lost earning rate, million \$ per 10<sup>5</sup> persons</b> | <b>Average lost earnings, \$1000 per death</b> | <b>State rank</b> |
|------------------------------------------------|-----------------------------|-------------------|-------------------------------------------------------|----------------------------------------|--------------------------------------------------------------------------|------------------------------------------------|-------------------|
| California                                     | 1,353                       | 27,824            | 126                                                   | 209 (204–216)                          | 1.0 (1.0–1.0)                                                            | 154.8 (150.5–159.4)                            | 13                |
| Colorado                                       | 199                         | 4,063             | 130                                                   | 29 (28–30)                             | 1.0 (0.9–1.0)                                                            | 147.4 (143.1–151.9)                            | 15                |
| Connecticut                                    | 142                         | 2,779             | 117                                                   | 19 (18–19)                             | 0.9 (0.8–0.9)                                                            | 132.3 (128.3–136.4)                            | 26                |
| Delaware                                       | 52                          | 954               | 156                                                   | 6 (6–6)                                | 1.1 (1.1–1.2)                                                            | 119.2 (115.7–122.9)                            | 5                 |
| District of Columbia                           | 30                          | 667               | 204                                                   | 6 (6–6)                                | 1.9 (1.8–1.9)                                                            | 190.3 (185.5–195.6)                            | 1                 |
| Florida                                        | 787                         | 14,875            | 104                                                   | 96 (93–99)                             | 0.8 (0.8–0.8)                                                            | 121.4 (117.6–125.3)                            | 38                |
| Georgia                                        | 368                         | 7,375             | 122                                                   | 52 (50–54)                             | 0.9 (0.9–0.9)                                                            | 141.2 (137.1–145.6)                            | 24                |
| Hawaii                                         | 33                          | 630               | 72                                                    | 4 (4–4)                                | 0.5 (0.5–0.6)                                                            | 127.0 (123.1–131.1)                            | 49                |
| Idaho                                          | 68                          | 1,240             | 123                                                   | 7 (7–7)                                | 0.7 (0.7–0.7)                                                            | 102.9 (99.2–106.8)                             | 44                |
| Illinois                                       | 467                         | 9,089             | 115                                                   | 60 (58–62)                             | 0.8 (0.8–0.8)                                                            | 129.1 (125.1–133.3)                            | 35                |
| Indiana                                        | 239                         | 4,680             | 117                                                   | 32 (31–33)                             | 0.9 (0.9–0.9)                                                            | 133.8 (129.9–137.9)                            | 25                |
| Iowa                                           | 126                         | 2,320             | 116                                                   | 14 (14–15)                             | 0.8 (0.7–0.8)                                                            | 112.7 (109.0–116.6)                            | 40                |
| Kansas                                         | 105                         | 2,133             | 123                                                   | 15 (15–15)                             | 0.9 (0.9–1.0)                                                            | 143.1 (138.7–147.6)                            | 19                |
| Kentucky                                       | 177                         | 3,412             | 122                                                   | 23 (22–24)                             | 0.9 (0.9–0.9)                                                            | 129.9 (126.1–133.8)                            | 22                |
| Louisiana                                      | 147                         | 2,949             | 106                                                   | 21 (21–22)                             | 0.8 (0.8–0.9)                                                            | 146.1 (142.0–150.4)                            | 30                |
| Maine                                          | 61                          | 1,110             | 113                                                   | 7 (7–7)                                | 0.8 (0.8–0.8)                                                            | 118.2 (114.4–122.1)                            | 33                |
| Maryland                                       | 218                         | 4,189             | 111                                                   | 28 (27–29)                             | 0.8 (0.7–0.8)                                                            | 127.6 (123.7–131.6)                            | 39                |
| Massachusetts                                  | 275                         | 5,522             | 126                                                   | 39 (38–40)                             | 1.0 (0.9–1.0)                                                            | 141.3 (137.2–145.6)                            | 17                |
| Michigan                                       | 424                         | 8,473             | 133                                                   | 60 (58–62)                             | 1.0 (1.0–1.1)                                                            | 141.4 (137.4–145.7)                            | 9                 |
| Minnesota                                      | 184                         | 3,515             | 109                                                   | 25 (24–26)                             | 0.8 (0.8–0.8)                                                            | 136.1 (132.4–140.0)                            | 32                |
| Mississippi                                    | 97                          | 1,856             | 99                                                    | 12 (12–12)                             | 0.7 (0.7–0.7)                                                            | 124.2 (120.3–128.3)                            | 46                |
| Missouri                                       | 212                         | 4,345             | 118                                                   | 32 (31–33)                             | 1.0 (1.0–1.0)                                                            | 152.4 (148.3–156.8)                            | 12                |
| Montana                                        | 45                          | 829               | 117                                                   | 5 (4–5)                                | 0.7 (0.7–0.7)                                                            | 102.9 (99.1–106.9)                             | 45                |
| Nebraska                                       | 70                          | 1,385             | 124                                                   | 9 (9–10)                               | 0.9 (0.9–1.0)                                                            | 135.1 (130.9–139.4)                            | 20                |
| Nevada                                         | 101                         | 2,001             | 120                                                   | 15 (14–15)                             | 1.0 (0.9–1.0)                                                            | 145.3 (141.5–149.3)                            | 16                |

| <b>(eTable 3)</b><br><b>State, sex,</b><br><b>cancer</b>                        | <b>No. of</b><br><b>cancer</b><br><b>deaths</b> | <b>Total</b><br><b>PYLL</b> | <b>Age-std.</b><br><b>PYLL rate,</b><br><b>per 10<sup>5</sup></b><br><b>persons</b> | <b>Total lost</b><br><b>earnings,</b><br><b>million \$</b> | <b>Age-std. lost</b><br><b>earning rate,</b><br><b>million \$ per</b><br><b>10<sup>5</sup> persons</b> | <b>Average lost</b><br><b>earnings,</b><br><b>\$1000 per</b><br><b>death</b> | <b>State</b><br><b>rank</b> |
|---------------------------------------------------------------------------------|-------------------------------------------------|-----------------------------|-------------------------------------------------------------------------------------|------------------------------------------------------------|--------------------------------------------------------------------------------------------------------|------------------------------------------------------------------------------|-----------------------------|
| New Hampshire                                                                   | 54                                              | 1,170                       | 140                                                                                 | 10 (10–10)                                                 | 1.3 (1.3–1.4)                                                                                          | 184.2 (179.8–189.1)                                                          | 3                           |
| New Jersey                                                                      | 349                                             | 6,878                       | 119                                                                                 | 46 (45–47)                                                 | 0.8 (0.8–0.9)                                                                                          | 131.6 (127.6–135.8)                                                          | 28                          |
| New Mexico                                                                      | 101                                             | 2,110                       | 165                                                                                 | 16 (15–16)                                                 | 1.4 (1.4–1.4)                                                                                          | 157.1 (152.6–161.7)                                                          | 2                           |
| New York                                                                        | 796                                             | 15,829                      | 129                                                                                 | 111 (108–114)                                              | 1.0 (1.0–1.0)                                                                                          | 139.5 (135.5–143.8)                                                          | 14                          |
| North Carolina                                                                  | 340                                             | 6,396                       | 99                                                                                  | 40 (39–41)                                                 | 0.7 (0.6–0.7)                                                                                          | 117.6 (113.8–121.4)                                                          | 48                          |
| North Dakota                                                                    | 32                                              | 490                         | 107                                                                                 | 2 (2–2)                                                    | 0.4 (0.4–0.4)                                                                                          | 59.9 (57.0–63.0)                                                             | 51                          |
| Ohio                                                                            | 453                                             | 8,657                       | 115                                                                                 | 57 (56–59)                                                 | 0.8 (0.8–0.9)                                                                                          | 126.6 (122.6–130.6)                                                          | 29                          |
| Oklahoma                                                                        | 132                                             | 2,608                       | 112                                                                                 | 18 (17–19)                                                 | 0.8 (0.8–0.9)                                                                                          | 136.5 (132.6–140.4)                                                          | 27                          |
| Oregon                                                                          | 192                                             | 3,765                       | 151                                                                                 | 26 (25–27)                                                 | 1.2 (1.2–1.2)                                                                                          | 136.6 (132.6–140.7)                                                          | 4                           |
| Pennsylvania                                                                    | 544                                             | 10,773                      | 128                                                                                 | 76 (74–78)                                                 | 1.0 (1.0–1.0)                                                                                          | 139.4 (135.4–143.6)                                                          | 11                          |
| Rhode Island                                                                    | 46                                              | 909                         | 119                                                                                 | 6 (5–6)                                                    | 0.7 (0.7–0.8)                                                                                          | 119.9 (115.5–124.4)                                                          | 43                          |
| South Carolina                                                                  | 182                                             | 3,396                       | 107                                                                                 | 22 (22–23)                                                 | 0.8 (0.8–0.8)                                                                                          | 121.9 (118.4–125.5)                                                          | 37                          |
| South Dakota                                                                    | 22                                              | 382                         | 76                                                                                  | 2 (2–2)                                                    | 0.5 (0.4–0.5)                                                                                          | 97.4 (94.0–101.0)                                                            | 50                          |
| Tennessee                                                                       | 281                                             | 5,518                       | 135                                                                                 | 38 (37–39)                                                 | 1.0 (1.0–1.1)                                                                                          | 136.2 (132.3–140.4)                                                          | 10                          |
| Texas                                                                           | 755                                             | 15,358                      | 105                                                                                 | 116 (113–120)                                              | 0.8 (0.8–0.8)                                                                                          | 153.9 (149.6–158.3)                                                          | 34                          |
| Utah                                                                            | 89                                              | 1,716                       | 126                                                                                 | 11 (11–12)                                                 | 0.8 (0.8–0.9)                                                                                          | 126.6 (122.8–130.7)                                                          | 31                          |
| Vermont                                                                         | 26                                              | 485                         | 119                                                                                 | 3 (3–3)                                                    | 0.9 (0.9–1.0)                                                                                          | 117.6 (113.9–121.4)                                                          | 18                          |
| Virginia                                                                        | 299                                             | 5,651                       | 110                                                                                 | 36 (35–37)                                                 | 0.7 (0.7–0.8)                                                                                          | 119.9 (116.2–123.7)                                                          | 42                          |
| Washington                                                                      | 315                                             | 6,214                       | 145                                                                                 | 44 (43–45)                                                 | 1.1 (1.0–1.1)                                                                                          | 139.5 (135.4–143.8)                                                          | 8                           |
| West Virginia                                                                   | 87                                              | 1,765                       | 137                                                                                 | 12 (12–13)                                                 | 1.1 (1.1–1.2)                                                                                          | 143.4 (139.3–147.8)                                                          | 6                           |
| Wisconsin                                                                       | 235                                             | 4,668                       | 126                                                                                 | 33 (32–34)                                                 | 0.9 (0.9–1.0)                                                                                          | 138.5 (134.4–142.8)                                                          | 21                          |
| Wyoming                                                                         | 20                                              | 407                         | 118                                                                                 | 3 (2–3)                                                    | 0.8 (0.8–0.8)                                                                                          | 127.5 (123.3–132.1)                                                          | 36                          |
| <b>United States</b>                                                            | <b>11,938</b>                                   | <b>234,938</b>              | <b>119</b>                                                                          | <b>1,629 (1,582–1,679)</b>                                 | <b>0.9 (0.9–0.9)</b>                                                                                   | <b>136.5 (132.5–140.7)</b>                                                   | <b>–</b>                    |
| <b>Liver,</b><br><b>intrahepatic bile</b><br><b>duct (both</b><br><b>sexes)</b> |                                                 |                             |                                                                                     |                                                            |                                                                                                        |                                                                              |                             |



| <b>(eTable 3)</b><br><b>State, sex,</b><br><b>cancer</b> | <b>No. of</b><br><b>cancer</b><br><b>deaths</b> | <b>Total</b><br><b>PYLL</b> | <b>Age-std.</b><br><b>PYLL rate,</b><br><b>per 10<sup>5</sup></b><br><b>persons</b> | <b>Total lost</b><br><b>earnings,</b><br><b>million \$</b> | <b>Age-std. lost</b><br><b>earning rate,</b><br><b>million \$ per</b><br><b>10<sup>5</sup> persons</b> | <b>Average lost</b><br><b>earnings,</b><br><b>\$1000 per</b><br><b>death</b> | <b>State</b><br><b>rank</b> |
|----------------------------------------------------------|-------------------------------------------------|-----------------------------|-------------------------------------------------------------------------------------|------------------------------------------------------------|--------------------------------------------------------------------------------------------------------|------------------------------------------------------------------------------|-----------------------------|
| Alabama                                                  | 401                                             | 7,350                       | 118                                                                                 | 95 (92–99)                                                 | 1.6 (1.5–1.6)                                                                                          | 238.0 (229.9–246.0)                                                          | 11                          |
| Alaska                                                   | 32                                              | 700                         | 85                                                                                  | 11 (11–12)                                                 | 1.3 (1.3–1.3)                                                                                          | 350.3 (341.5–359.6)                                                          | 29                          |
| Arizona                                                  | 504                                             | 9,054                       | 107                                                                                 | 114 (110–118)                                              | 1.5 (1.4–1.5)                                                                                          | 226.2 (218.4–233.8)                                                          | 18                          |
| Arkansas                                                 | 236                                             | 4,398                       | 117                                                                                 | 56 (54–57)                                                 | 1.5 (1.5–1.6)                                                                                          | 235.6 (227.8–243.4)                                                          | 15                          |
| California                                               | 2,964                                           | 54,254                      | 123                                                                                 | 692 (670–715)                                              | 1.5 (1.5–1.6)                                                                                          | 233.6 (225.9–241.4)                                                          | 13                          |
| Colorado                                                 | 316                                             | 6,040                       | 92                                                                                  | 80 (78–83)                                                 | 1.2 (1.2–1.3)                                                                                          | 254.2 (245.9–262.6)                                                          | 35                          |
| Connecticut                                              | 254                                             | 4,562                       | 98                                                                                  | 55 (53–57)                                                 | 1.2 (1.1–1.2)                                                                                          | 216.7 (208.9–224.6)                                                          | 36                          |
| Delaware                                                 | 69                                              | 1,257                       | 97                                                                                  | 16 (16–17)                                                 | 1.3 (1.3–1.4)                                                                                          | 234.8 (226.9–242.9)                                                          | 28                          |
| District of<br>Columbia                                  | 54                                              | 958                         | 140                                                                                 | 11 (11–12)                                                 | 1.6 (1.6–1.7)                                                                                          | 210.0 (202.4–217.4)                                                          | 10                          |
| Florida                                                  | 1,710                                           | 30,602                      | 109                                                                                 | 379 (365–392)                                              | 1.4 (1.4–1.5)                                                                                          | 221.4 (213.6–229.1)                                                          | 20                          |
| Georgia                                                  | 637                                             | 11,873                      | 101                                                                                 | 155 (150–161)                                              | 1.3 (1.2–1.3)                                                                                          | 243.9 (235.8–251.9)                                                          | 31                          |
| Hawaii                                                   | 129                                             | 2,346                       | 132                                                                                 | 31 (30–32)                                                 | 1.8 (1.8–1.9)                                                                                          | 238.4 (230.8–246.1)                                                          | 6                           |
| Idaho                                                    | 111                                             | 1,941                       | 100                                                                                 | 22 (21–22)                                                 | 1.1 (1.1–1.2)                                                                                          | 194.9 (187.9–202.0)                                                          | 39                          |
| Illinois                                                 | 872                                             | 15,859                      | 103                                                                                 | 192 (185–198)                                              | 1.2 (1.2–1.3)                                                                                          | 219.8 (212.6–227.1)                                                          | 33                          |
| Indiana                                                  | 411                                             | 7,575                       | 92                                                                                  | 97 (93–100)                                                | 1.2 (1.1–1.2)                                                                                          | 234.9 (226.9–242.7)                                                          | 38                          |
| Iowa                                                     | 197                                             | 3,346                       | 84                                                                                  | 40 (39–42)                                                 | 1.0 (1.0–1.1)                                                                                          | 204.8 (197.4–212.3)                                                          | 44                          |
| Kansas                                                   | 172                                             | 3,116                       | 88                                                                                  | 39 (38–41)                                                 | 1.1 (1.1–1.1)                                                                                          | 228.0 (220.1–235.9)                                                          | 40                          |
| Kentucky                                                 | 370                                             | 7,095                       | 129                                                                                 | 95 (92–98)                                                 | 1.8 (1.7–1.8)                                                                                          | 256.8 (248.6–265.2)                                                          | 7                           |
| Louisiana                                                | 450                                             | 8,626                       | 147                                                                                 | 120 (116–124)                                              | 2.0 (2.0–2.1)                                                                                          | 266.5 (257.4–275.8)                                                          | 2                           |
| Maine                                                    | 95                                              | 1,597                       | 78                                                                                  | 18 (17–18)                                                 | 0.9 (0.9–0.9)                                                                                          | 185.4 (177.9–192.9)                                                          | 49                          |
| Maryland                                                 | 413                                             | 7,454                       | 99                                                                                  | 94 (91–98)                                                 | 1.2 (1.2–1.3)                                                                                          | 228.5 (220.4–236.8)                                                          | 34                          |
| Massachusetts                                            | 444                                             | 7,765                       | 90                                                                                  | 93 (90–96)                                                 | 1.1 (1.0–1.1)                                                                                          | 209.2 (201.6–217.1)                                                          | 42                          |
| Michigan                                                 | 639                                             | 11,558                      | 89                                                                                  | 138 (133–143)                                              | 1.1 (1.1–1.1)                                                                                          | 216.0 (208.6–223.3)                                                          | 41                          |
| Minnesota                                                | 324                                             | 5,982                       | 88                                                                                  | 79 (77–82)                                                 | 1.2 (1.1–1.2)                                                                                          | 244.6 (236.4–252.8)                                                          | 37                          |
| Mississippi                                              | 257                                             | 4,831                       | 133                                                                                 | 68 (66–70)                                                 | 1.9 (1.9–2.0)                                                                                          | 264.4 (256.0–273.4)                                                          | 3                           |

| <b>(eTable 3)<br/>State, sex,<br/>cancer</b> | <b>No. of<br/>cancer<br/>deaths</b> | <b>Total<br/>PYLL</b> | <b>Age-std.<br/>PYLL rate,<br/>per 10<sup>5</sup><br/>persons</b> | <b>Total lost<br/>earnings,<br/>million \$</b> | <b>Age-std. lost<br/>earning rate,<br/>million \$ per<br/>10<sup>5</sup> persons</b> | <b>Average lost<br/>earnings,<br/>\$1000 per<br/>death</b> | <b>State<br/>rank</b> |
|----------------------------------------------|-------------------------------------|-----------------------|-------------------------------------------------------------------|------------------------------------------------|--------------------------------------------------------------------------------------|------------------------------------------------------------|-----------------------|
| Missouri                                     | 429                                 | 8,051                 | 102                                                               | 107 (103–110)                                  | 1.4 (1.3–1.4)                                                                        | 248.5 (240.4–257.0)                                        | 26                    |
| Montana                                      | 75                                  | 1,467                 | 105                                                               | 21 (20–22)                                     | 1.6 (1.6–1.7)                                                                        | 281.8 (273.0–290.7)                                        | 9                     |
| Nebraska                                     | 85                                  | 1,576                 | 72                                                                | 21 (20–22)                                     | 1.0 (1.0–1.0)                                                                        | 245.8 (238.4–253.6)                                        | 45                    |
| Nevada                                       | 204                                 | 3,756                 | 106                                                               | 49 (47–50)                                     | 1.4 (1.4–1.5)                                                                        | 239.3 (231.4–247.1)                                        | 22                    |
| New Hampshire                                | 89                                  | 1,665                 | 95                                                                | 21 (21–22)                                     | 1.3 (1.3–1.3)                                                                        | 240.4 (233.0–248.0)                                        | 30                    |
| New Jersey                                   | 543                                 | 9,410                 | 84                                                                | 115 (111–119)                                  | 1.0 (1.0–1.0)                                                                        | 211.9 (204.6–219.4)                                        | 46                    |
| New Mexico                                   | 196                                 | 3,702                 | 143                                                               | 53 (52–55)                                     | 2.2 (2.1–2.2)                                                                        | 271.6 (262.8–280.8)                                        | 1                     |
| New York                                     | 1,289                               | 23,475                | 98                                                                | 298 (288–308)                                  | 1.3 (1.2–1.3)                                                                        | 231.1 (223.4–238.6)                                        | 32                    |
| North Carolina                               | 772                                 | 14,270                | 113                                                               | 184 (177–190)                                  | 1.5 (1.4–1.5)                                                                        | 237.8 (229.9–245.5)                                        | 16                    |
| North Dakota                                 | 33                                  | 531                   | 59                                                                | 6 (6–6)                                        | 0.7 (0.7–0.7)                                                                        | 185.0 (179.1–191.3)                                        | 51                    |
| Ohio                                         | 823                                 | 15,124                | 102                                                               | 201 (194–207)                                  | 1.4 (1.4–1.4)                                                                        | 244.1 (236.1–251.9)                                        | 24                    |
| Oklahoma                                     | 314                                 | 6,104                 | 129                                                               | 86 (83–89)                                     | 1.9 (1.8–2.0)                                                                        | 274.2 (265.8–283.1)                                        | 4                     |
| Oregon                                       | 337                                 | 6,348                 | 116                                                               | 81 (79–84)                                     | 1.5 (1.5–1.6)                                                                        | 241.4 (233.1–249.8)                                        | 14                    |
| Pennsylvania                                 | 947                                 | 17,256                | 100                                                               | 223 (215–231)                                  | 1.3 (1.3–1.4)                                                                        | 235.5 (227.5–243.5)                                        | 27                    |
| Rhode Island                                 | 85                                  | 1,602                 | 116                                                               | 21 (20–22)                                     | 1.6 (1.5–1.6)                                                                        | 245.1 (236.5–253.6)                                        | 12                    |
| South Carolina                               | 367                                 | 6,868                 | 105                                                               | 92 (89–95)                                     | 1.4 (1.4–1.5)                                                                        | 250.7 (242.2–259.3)                                        | 19                    |
| South Dakota                                 | 48                                  | 892                   | 92                                                                | 14 (14–15)                                     | 1.4 (1.4–1.5)                                                                        | 296.2 (288.1–304.5)                                        | 23                    |
| Tennessee                                    | 540                                 | 10,486                | 124                                                               | 145 (140–150)                                  | 1.7 (1.7–1.8)                                                                        | 268.2 (259.5–277.3)                                        | 8                     |
| Texas                                        | 2,058                               | 39,660                | 135                                                               | 548 (531–566)                                  | 1.8 (1.8–1.9)                                                                        | 266.3 (257.9–275.0)                                        | 5                     |
| Utah                                         | 102                                 | 2,086                 | 75                                                                | 29 (28–30)                                     | 1.0 (1.0–1.1)                                                                        | 285.2 (276.9–294.0)                                        | 43                    |
| Vermont                                      | 46                                  | 777                   | 86                                                                | 9 (8–9)                                        | 0.9 (0.9–1.0)                                                                        | 188.1 (181.3–195.2)                                        | 48                    |
| Virginia                                     | 560                                 | 10,718                | 103                                                               | 143 (139–148)                                  | 1.4 (1.3–1.4)                                                                        | 255.6 (247.4–263.9)                                        | 25                    |
| Washington                                   | 548                                 | 10,125                | 113                                                               | 129 (125–134)                                  | 1.4 (1.4–1.5)                                                                        | 236.0 (227.6–244.4)                                        | 21                    |
| West Virginia                                | 157                                 | 2,991                 | 110                                                               | 38 (36–39)                                     | 1.5 (1.4–1.5)                                                                        | 240.4 (232.3–248.5)                                        | 17                    |
| Wisconsin                                    | 347                                 | 5,890                 | 80                                                                | 70 (67–72)                                     | 1.0 (0.9–1.0)                                                                        | 201.4 (194.1–208.9)                                        | 47                    |

| <b>(eTable 3)</b><br><b>State, sex,</b><br><b>cancer</b>       | <b>No. of</b><br><b>cancer</b><br><b>deaths</b> | <b>Total</b><br><b>PYLL</b> | <b>Age-std.</b><br><b>PYLL rate,</b><br><b>per 10<sup>5</sup></b><br><b>persons</b> | <b>Total lost</b><br><b>earnings,</b><br><b>million \$</b> | <b>Age-std. lost</b><br><b>earning rate,</b><br><b>million \$ per</b><br><b>10<sup>5</sup> persons</b> | <b>Average lost</b><br><b>earnings,</b><br><b>\$1000 per</b><br><b>death</b> | <b>State</b><br><b>rank</b> |
|----------------------------------------------------------------|-------------------------------------------------|-----------------------------|-------------------------------------------------------------------------------------|------------------------------------------------------------|--------------------------------------------------------------------------------------------------------|------------------------------------------------------------------------------|-----------------------------|
| Wyoming                                                        | 33                                              | 606                         | 72                                                                                  | 7 (7–8)                                                    | 0.8 (0.8–0.9)                                                                                          | 219.6 (209.1–230.8)                                                          | 50                          |
| <b>United States</b>                                           | <b>23,088</b>                                   | <b>425,573</b>              | <b>107</b>                                                                          | <b>5,503 (5,319–5,686)</b>                                 | <b>1.4 (1.4–1.5)</b>                                                                                   | <b>238.4 (230.4–246.3)</b>                                                   | –                           |
| <b>Liver,</b><br><b>intrahepatic bile</b><br><b>duct (men)</b> |                                                 |                             |                                                                                     |                                                            |                                                                                                        |                                                                              |                             |
| Alabama                                                        | 286                                             | 5,182                       | 176                                                                                 | 81 (78–85)                                                 | 2.8 (2.7–2.9)                                                                                          | 284.4 (273.7–296.2)                                                          | 12                          |
| Alaska                                                         | 23                                              | 477                         | 113                                                                                 | 9 (9–10)                                                   | 2.0 (2.0–2.1)                                                                                          | 401.3 (389.5–413.7)                                                          | 37                          |
| Arizona                                                        | 340                                             | 6,211                       | 153                                                                                 | 98 (95–102)                                                | 2.6 (2.5–2.7)                                                                                          | 289.4 (278.6–300.8)                                                          | 18                          |
| Arkansas                                                       | 163                                             | 2,911                       | 156                                                                                 | 44 (42–46)                                                 | 2.4 (2.3–2.5)                                                                                          | 270.5 (259.8–282.0)                                                          | 26                          |
| California                                                     | 2,025                                           | 36,716                      | 172                                                                                 | 584 (562–606)                                              | 2.7 (2.6–2.8)                                                                                          | 288.2 (277.3–299.5)                                                          | 15                          |
| Colorado                                                       | 220                                             | 4,211                       | 131                                                                                 | 69 (67–72)                                                 | 2.1 (2.1–2.2)                                                                                          | 314.6 (303.2–326.5)                                                          | 32                          |
| Connecticut                                                    | 177                                             | 3,156                       | 139                                                                                 | 47 (45–49)                                                 | 2.1 (2.0–2.1)                                                                                          | 264.5 (253.9–276.0)                                                          | 36                          |
| Delaware                                                       | 47                                              | 871                         | 144                                                                                 | 14 (14–15)                                                 | 2.4 (2.4–2.5)                                                                                          | 301.0 (289.8–312.5)                                                          | 20                          |
| District of<br>Columbia                                        | 35                                              | 639                         | 200                                                                                 | 10 (9–10)                                                  | 3.0 (2.8–3.1)                                                                                          | 279.2 (268.2–290.8)                                                          | 9                           |
| Florida                                                        | 1,203                                           | 21,251                      | 157                                                                                 | 319 (306–332)                                              | 2.5 (2.4–2.6)                                                                                          | 264.9 (254.5–276.2)                                                          | 19                          |
| Georgia                                                        | 450                                             | 8,309                       | 149                                                                                 | 134 (129–139)                                              | 2.3 (2.2–2.4)                                                                                          | 297.2 (286.3–308.8)                                                          | 29                          |
| Hawaii                                                         | 90                                              | 1,654                       | 192                                                                                 | 27 (26–28)                                                 | 3.2 (3.1–3.3)                                                                                          | 300.6 (290.1–312.0)                                                          | 5                           |
| Idaho                                                          | 74                                              | 1,211                       | 120                                                                                 | 16 (15–17)                                                 | 1.6 (1.5–1.7)                                                                                          | 219.3 (209.3–230.1)                                                          | 47                          |
| Illinois                                                       | 564                                             | 9,998                       | 134                                                                                 | 153 (147–159)                                              | 2.0 (1.9–2.1)                                                                                          | 271.4 (260.9–282.8)                                                          | 38                          |
| Indiana                                                        | 284                                             | 5,189                       | 131                                                                                 | 82 (79–86)                                                 | 2.1 (2.0–2.2)                                                                                          | 290.2 (279.3–301.5)                                                          | 35                          |
| Iowa                                                           | 137                                             | 2,402                       | 124                                                                                 | 36 (35–38)                                                 | 1.8 (1.8–1.9)                                                                                          | 264.2 (253.7–275.3)                                                          | 40                          |
| Kansas                                                         | 120                                             | 2,136                       | 123                                                                                 | 33 (32–35)                                                 | 1.9 (1.8–2.0)                                                                                          | 276.4 (265.6–287.7)                                                          | 39                          |
| Kentucky                                                       | 259                                             | 4,861                       | 179                                                                                 | 78 (76–82)                                                 | 3.0 (2.8–3.1)                                                                                          | 303.0 (291.7–314.7)                                                          | 10                          |
| Louisiana                                                      | 342                                             | 6,564                       | 232                                                                                 | 107 (102–111)                                              | 3.7 (3.6–3.9)                                                                                          | 311.5 (299.7–323.6)                                                          | 2                           |
| Maine                                                          | 66                                              | 1,129                       | 114                                                                                 | 16 (15–17)                                                 | 1.7 (1.6–1.7)                                                                                          | 239.2 (228.9–250.3)                                                          | 46                          |
| Maryland                                                       | 298                                             | 5,419                       | 152                                                                                 | 84 (80–87)                                                 | 2.3 (2.2–2.4)                                                                                          | 280.4 (269.6–292.0)                                                          | 30                          |

| <b>(eTable 3)</b><br><b>State, sex,</b><br><b>cancer</b> | <b>No. of</b><br><b>cancer</b><br><b>deaths</b> | <b>Total</b><br><b>PYLL</b> | <b>Age-std.</b><br><b>PYLL rate,</b><br><b>per 10<sup>5</sup></b><br><b>persons</b> | <b>Total lost</b><br><b>earnings,</b><br><b>million \$</b> | <b>Age-std. lost</b><br><b>earning rate,</b><br><b>million \$ per</b><br><b>10<sup>5</sup> persons</b> | <b>Average lost</b><br><b>earnings,</b><br><b>\$1000 per</b><br><b>death</b> | <b>State</b><br><b>rank</b> |
|----------------------------------------------------------|-------------------------------------------------|-----------------------------|-------------------------------------------------------------------------------------|------------------------------------------------------------|--------------------------------------------------------------------------------------------------------|------------------------------------------------------------------------------|-----------------------------|
| Massachusetts                                            | 321                                             | 5,430                       | 132                                                                                 | 77 (74–81)                                                 | 1.8 (1.8–1.9)                                                                                          | 240.6 (230.6–251.6)                                                          | 41                          |
| Michigan                                                 | 428                                             | 7,495                       | 120                                                                                 | 112 (108–117)                                              | 1.8 (1.7–1.9)                                                                                          | 261.5 (251.3–272.8)                                                          | 42                          |
| Minnesota                                                | 232                                             | 4,292                       | 128                                                                                 | 69 (66–71)                                                 | 2.1 (2.0–2.2)                                                                                          | 296.5 (285.5–308.0)                                                          | 34                          |
| Mississippi                                              | 185                                             | 3,570                       | 208                                                                                 | 61 (59–63)                                                 | 3.6 (3.5–3.7)                                                                                          | 329.0 (317.4–341.0)                                                          | 3                           |
| Missouri                                                 | 305                                             | 5,636                       | 148                                                                                 | 91 (87–94)                                                 | 2.4 (2.3–2.5)                                                                                          | 297.1 (285.8–308.5)                                                          | 25                          |
| Montana                                                  | 54                                              | 1,066                       | 156                                                                                 | 19 (18–19)                                                 | 2.9 (2.8–3.0)                                                                                          | 343.2 (331.5–355.2)                                                          | 11                          |
| Nebraska                                                 | 56                                              | 1,054                       | 101                                                                                 | 18 (18–19)                                                 | 1.8 (1.7–1.9)                                                                                          | 324.1 (313.0–335.6)                                                          | 44                          |
| Nevada                                                   | 141                                             | 2,594                       | 148                                                                                 | 42 (40–43)                                                 | 2.4 (2.4–2.5)                                                                                          | 296.2 (285.3–307.6)                                                          | 22                          |
| New Hampshire                                            | 61                                              | 1,110                       | 127                                                                                 | 17 (17–18)                                                 | 2.1 (2.0–2.1)                                                                                          | 284.8 (274.5–296.0)                                                          | 33                          |
| New Jersey                                               | 374                                             | 6,505                       | 123                                                                                 | 99 (95–103)                                                | 1.8 (1.7–1.9)                                                                                          | 264.0 (253.8–275.1)                                                          | 43                          |
| New Mexico                                               | 150                                             | 2,837                       | 230                                                                                 | 48 (46–50)                                                 | 4.0 (3.9–4.2)                                                                                          | 319.2 (307.8–331.0)                                                          | 1                           |
| New York                                                 | 894                                             | 15,963                      | 142                                                                                 | 250 (241–260)                                              | 2.2 (2.2–2.3)                                                                                          | 280.0 (269.7–291.0)                                                          | 31                          |
| North Carolina                                           | 536                                             | 9,679                       | 163                                                                                 | 153 (147–159)                                              | 2.6 (2.5–2.7)                                                                                          | 285.1 (274.3–296.3)                                                          | 17                          |
| North Dakota                                             | 20                                              | 331                         | 76                                                                                  | 5 (5–5)                                                    | 1.2 (1.1–1.2)                                                                                          | 264.1 (254.7–274.0)                                                          | 51                          |
| Ohio                                                     | 580                                             | 10,554                      | 148                                                                                 | 171 (164–177)                                              | 2.4 (2.4–2.5)                                                                                          | 294.1 (283.3–305.5)                                                          | 21                          |
| Oklahoma                                                 | 221                                             | 4,298                       | 191                                                                                 | 74 (72–77)                                                 | 3.4 (3.3–3.5)                                                                                          | 336.8 (325.1–349.2)                                                          | 4                           |
| Oregon                                                   | 244                                             | 4,444                       | 167                                                                                 | 68 (66–71)                                                 | 2.6 (2.5–2.7)                                                                                          | 280.3 (269.1–291.8)                                                          | 16                          |
| Pennsylvania                                             | 675                                             | 12,224                      | 146                                                                                 | 192 (185–200)                                              | 2.3 (2.2–2.4)                                                                                          | 284.9 (274.1–296.2)                                                          | 28                          |
| Rhode Island                                             | 64                                              | 1,160                       | 174                                                                                 | 18 (17–18)                                                 | 2.7 (2.6–2.8)                                                                                          | 276.2 (265.4–287.7)                                                          | 13                          |
| South Carolina                                           | 264                                             | 4,975                       | 160                                                                                 | 81 (78–84)                                                 | 2.7 (2.6–2.8)                                                                                          | 305.5 (294.0–317.5)                                                          | 14                          |
| South Dakota                                             | 36                                              | 696                         | 148                                                                                 | 13 (13–14)                                                 | 3.0 (2.9–3.1)                                                                                          | 364.0 (353.6–375.0)                                                          | 8                           |
| Tennessee                                                | 394                                             | 7,453                       | 181                                                                                 | 122 (117–127)                                              | 3.0 (2.9–3.1)                                                                                          | 309.2 (297.7–321.3)                                                          | 7                           |
| Texas                                                    | 1,448                                           | 27,861                      | 194                                                                                 | 470 (453–487)                                              | 3.2 (3.1–3.3)                                                                                          | 324.5 (312.8–336.7)                                                          | 6                           |
| Utah                                                     | 70                                              | 1,351                       | 99                                                                                  | 22 (22–23)                                                 | 1.6 (1.5–1.7)                                                                                          | 319.0 (307.5–331.0)                                                          | 48                          |
| Vermont                                                  | 30                                              | 512                         | 113                                                                                 | 7 (7–8)                                                    | 1.6 (1.5–1.6)                                                                                          | 244.8 (234.6–256.0)                                                          | 49                          |

| <b>(eTable 3)</b><br><b>State, sex, cancer</b> | <b>No. of cancer deaths</b> | <b>Total PYLL</b> | <b>Age-std. PYLL rate, per 10<sup>5</sup> persons</b> | <b>Total lost earnings, million \$</b> | <b>Age-std. lost earning rate, million \$ per 10<sup>5</sup> persons</b> | <b>Average lost earnings, \$1000 per death</b> | <b>State rank</b> |
|------------------------------------------------|-----------------------------|-------------------|-------------------------------------------------------|----------------------------------------|--------------------------------------------------------------------------|------------------------------------------------|-------------------|
| Virginia                                       | 388                         | 7,279             | 146                                                   | 120 (115–124)                          | 2.4 (2.3–2.5)                                                            | 308.8 (297.5–320.5)                            | 27                |
| Washington                                     | 390                         | 7,145             | 159                                                   | 110 (106–115)                          | 2.4 (2.3–2.5)                                                            | 282.3 (271.0–293.8)                            | 23                |
| West Virginia                                  | 104                         | 1,964             | 147                                                   | 31 (30–32)                             | 2.4 (2.3–2.5)                                                            | 299.5 (287.8–311.5)                            | 24                |
| Wisconsin                                      | 244                         | 4,151             | 115                                                   | 61 (58–63)                             | 1.7 (1.6–1.8)                                                            | 248.3 (238.4–259.4)                            | 45                |
| Wyoming                                        | 29                          | 516               | 123                                                   | 7 (6–7)                                | 1.6 (1.5–1.6)                                                            | 230.1 (218.5–242.9)                            | 50                |
| <b>United States</b>                           | <b>16,141</b>               | <b>294,643</b>    | <b>154</b>                                            | <b>4,668 (4,494–4,853)</b>             | <b>2.4 (2.4–2.5)</b>                                                     | <b>289.2 (278.5–300.7)</b>                     | –                 |
| <b>Liver, intrahepatic bile duct (women)</b>   |                             |                   |                                                       |                                        |                                                                          |                                                |                   |
| Alabama                                        | 115                         | 2,168             | 66                                                    | 14 (14–14)                             | 0.5 (0.4–0.5)                                                            | 121.8 (117.9–125.8)                            | 20                |
| Alaska                                         | ^                           | ^                 | ^                                                     | ^                                      | ^                                                                        | ^                                              | 9                 |
| Arizona                                        | 164                         | 2,843             | 64                                                    | 16 (15–16)                             | 0.4 (0.4–0.4)                                                            | 94.5 (91.3–98.0)                               | 30                |
| Arkansas                                       | 73                          | 1,486             | 83                                                    | 11 (11–12)                             | 0.7 (0.7–0.7)                                                            | 157.4 (153.1–161.9)                            | 1                 |
| California                                     | 939                         | 17,537            | 78                                                    | 109 (105–112)                          | 0.5 (0.5–0.5)                                                            | 115.6 (111.8–119.4)                            | 13                |
| Colorado                                       | 96                          | 1,828             | 54                                                    | 11 (11–11)                             | 0.3 (0.3–0.3)                                                            | 115.3 (111.1–119.7)                            | 41                |
| Connecticut                                    | 77                          | 1,405             | 61                                                    | 8 (8–8)                                | 0.4 (0.4–0.4)                                                            | 106.5 (102.9–110.4)                            | 32                |
| Delaware                                       | 22                          | 386               | 56                                                    | 2 (2–2)                                | 0.3 (0.3–0.3)                                                            | 92.8 (89.4–96.6)                               | 42                |
| District of Columbia                           | 19                          | 320               | 89                                                    | 2 (1–2)                                | 0.4 (0.4–0.4)                                                            | 82.2 (78.6–85.8)                               | 25                |
| Florida                                        | 507                         | 9,351             | 66                                                    | 60 (58–61)                             | 0.5 (0.5–0.5)                                                            | 117.6 (113.9–121.2)                            | 12                |
| Georgia                                        | 187                         | 3,564             | 58                                                    | 22 (21–22)                             | 0.3 (0.3–0.4)                                                            | 115.1 (111.1–119.2)                            | 37                |
| Hawaii                                         | 39                          | 692               | 75                                                    | 4 (4–4)                                | 0.4 (0.4–0.5)                                                            | 94.0 (90.5–97.8)                               | 21                |
| Idaho                                          | 37                          | 730               | 81                                                    | 5 (5–6)                                | 0.7 (0.6–0.7)                                                            | 146.0 (142.1–150.3)                            | 3                 |
| Illinois                                       | 308                         | 5,861             | 75                                                    | 39 (37–40)                             | 0.5 (0.5–0.5)                                                            | 125.0 (121.2–128.9)                            | 7                 |
| Indiana                                        | 127                         | 2,386             | 55                                                    | 14 (14–15)                             | 0.3 (0.3–0.3)                                                            | 110.3 (106.4–114.5)                            | 38                |
| Iowa                                           | 60                          | 943               | 47                                                    | 4 (4–4)                                | 0.2 (0.2–0.2)                                                            | 68.9 (66.0–71.9)                               | 46                |
| Kansas                                         | 52                          | 980               | 56                                                    | 6 (6–6)                                | 0.4 (0.4–0.4)                                                            | 115.7 (111.8–119.6)                            | 34                |
| Kentucky                                       | 111                         | 2,235             | 84                                                    | 17 (16–17)                             | 0.7 (0.7–0.7)                                                            | 148.9 (144.8–153.2)                            | 2                 |

| (eTable 3)<br>State, sex,<br>cancer | No. of<br>cancer<br>deaths | Total<br>PYLL | Age-std.<br>PYLL rate,<br>per 10 <sup>5</sup><br>persons | Total lost<br>earnings,<br>million \$ | Age-std. lost<br>earning rate,<br>million \$ per<br>10 <sup>5</sup> persons | Average lost<br>earnings,<br>\$1000 per<br>death | State<br>rank |
|-------------------------------------|----------------------------|---------------|----------------------------------------------------------|---------------------------------------|-----------------------------------------------------------------------------|--------------------------------------------------|---------------|
| Louisiana                           | 108                        | 2,062         | 71                                                       | 13 (13–14)                            | 0.5 (0.5–0.5)                                                               | 123.3 (119.3–127.4)                              | 16            |
| Maine                               | 29                         | 468           | 44                                                       | 2 (2–2)                               | 0.2 (0.2–0.2)                                                               | 62.6 (59.4–66.1)                                 | 49            |
| Maryland                            | 115                        | 2,035         | 52                                                       | 11 (10–11)                            | 0.3 (0.3–0.3)                                                               | 93.4 (89.9–97.2)                                 | 44            |
| Massachusetts                       | 123                        | 2,335         | 54                                                       | 16 (15–16)                            | 0.4 (0.4–0.4)                                                               | 126.9 (122.9–130.8)                              | 29            |
| Michigan                            | 211                        | 4,063         | 61                                                       | 26 (25–27)                            | 0.4 (0.4–0.4)                                                               | 123.0 (119.0–127.2)                              | 27            |
| Minnesota                           | 92                         | 1,690         | 49                                                       | 10 (10–11)                            | 0.3 (0.3–0.3)                                                               | 113.1 (109.5–116.9)                              | 40            |
| Mississippi                         | 72                         | 1,262         | 64                                                       | 7 (7–7)                               | 0.4 (0.4–0.4)                                                               | 98.3 (94.8–102.1)                                | 33            |
| Missouri                            | 124                        | 2,415         | 60                                                       | 16 (15–16)                            | 0.4 (0.4–0.4)                                                               | 128.7 (124.5–132.9)                              | 22            |
| Montana                             | 21                         | 401           | 54                                                       | 3 (3–3)                               | 0.4 (0.3–0.4)                                                               | 123.4 (119.2–127.7)                              | 35            |
| Nebraska                            | 29                         | 522           | 43                                                       | 3 (3–3)                               | 0.2 (0.2–0.2)                                                               | 94.6 (90.9–98.5)                                 | 47            |
| Nevada                              | 63                         | 1,162         | 65                                                       | 7 (7–7)                               | 0.4 (0.4–0.4)                                                               | 111.5 (107.7–115.4)                              | 26            |
| New Hampshire                       | 28                         | 554           | 65                                                       | 4 (4–4)                               | 0.5 (0.5–0.6)                                                               | 143.6 (139.5–147.9)                              | 6             |
| New Jersey                          | 169                        | 2,904         | 49                                                       | 16 (16–17)                            | 0.3 (0.3–0.3)                                                               | 96.2 (92.9–99.8)                                 | 43            |
| New Mexico                          | 46                         | 865           | 64                                                       | 5 (5–6)                               | 0.4 (0.4–0.4)                                                               | 116.2 (112.4–120.3)                              | 24            |
| New York                            | 395                        | 7,512         | 59                                                       | 47 (46–49)                            | 0.4 (0.4–0.4)                                                               | 119.8 (116.1–123.7)                              | 28            |
| North Carolina                      | 236                        | 4,590         | 69                                                       | 31 (30–32)                            | 0.5 (0.5–0.5)                                                               | 129.7 (125.6–133.9)                              | 14            |
| North Dakota                        | ^                          | ^             | ^                                                        | ^                                     | ^                                                                           | ^                                                | 50            |
| Ohio                                | 243                        | 4,570         | 60                                                       | 30 (29–31)                            | 0.4 (0.4–0.4)                                                               | 124.1 (120.3–128.1)                              | 23            |
| Oklahoma                            | 93                         | 1,806         | 71                                                       | 12 (11–12)                            | 0.5 (0.4–0.5)                                                               | 125.2 (120.9–129.6)                              | 18            |
| Oregon                              | 93                         | 1,903         | 69                                                       | 13 (12–13)                            | 0.5 (0.5–0.5)                                                               | 138.9 (134.2–143.6)                              | 11            |
| Pennsylvania                        | 272                        | 5,032         | 57                                                       | 31 (30–32)                            | 0.4 (0.4–0.4)                                                               | 112.6 (108.9–116.4)                              | 31            |
| Rhode Island                        | 21                         | 441           | 65                                                       | 3 (3–3)                               | 0.5 (0.5–0.5)                                                               | 149.6 (145.1–154.1)                              | 10            |
| South Carolina                      | 103                        | 1,893         | 56                                                       | 11 (11–12)                            | 0.4 (0.3–0.4)                                                               | 109.9 (106.1–113.8)                              | 36            |
| South Dakota                        | ^                          | ^             | ^                                                        | ^                                     | ^                                                                           | ^                                                | 48            |
| Tennessee                           | 146                        | 3,034         | 73                                                       | 23 (22–24)                            | 0.6 (0.6–0.6)                                                               | 157.2 (152.6–161.9)                              | 4             |
| Texas                               | 610                        | 11,798        | 80                                                       | 78 (76–81)                            | 0.5 (0.5–0.5)                                                               | 128.0 (124.0–132.1)                              | 8             |

| <b>(eTable 3)<br/>State, sex,<br/>cancer</b> | <b>No. of<br/>cancer<br/>deaths</b> | <b>Total<br/>PYLL</b> | <b>Age-std.<br/>PYLL rate,<br/>per 10<sup>5</sup><br/>persons</b> | <b>Total lost<br/>earnings,<br/>million \$</b> | <b>Age-std. lost<br/>earning rate,<br/>million \$ per<br/>10<sup>5</sup> persons</b> | <b>Average lost<br/>earnings,<br/>\$1000 per<br/>death</b> | <b>State<br/>rank</b> |
|----------------------------------------------|-------------------------------------|-----------------------|-------------------------------------------------------------------|------------------------------------------------|--------------------------------------------------------------------------------------|------------------------------------------------------------|-----------------------|
| Utah                                         | 32                                  | 735                   | 54                                                                | 7 (7–7)                                        | 0.5 (0.5–0.5)                                                                        | 211.1 (205.8–<br>216.4)                                    | 15                    |
| Vermont                                      | 16                                  | 265                   | 61                                                                | 1 (1–1)                                        | 0.3 (0.3–0.3)                                                                        | 81.5 (78.4–<br>84.8)                                       | 39                    |
| Virginia                                     | 172                                 | 3,439                 | 65                                                                | 23 (23–24)                                     | 0.5 (0.4–0.5)                                                                        | 135.2 (130.9–<br>139.6)                                    | 19                    |
| Washington                                   | 158                                 | 2,981                 | 69                                                                | 19 (19–20)                                     | 0.5 (0.5–0.5)                                                                        | 121.2 (117.4–<br>125.1)                                    | 17                    |
| West Virginia                                | 53                                  | 1,027                 | 75                                                                | 7 (6–7)                                        | 0.5 (0.5–0.6)                                                                        | 123.9 (119.6–<br>128.3)                                    | 5                     |
| Wisconsin                                    | 103                                 | 1,740                 | 46                                                                | 9 (9–10)                                       | 0.3 (0.2–0.3)                                                                        | 89.6 (86.3–<br>93.1)                                       | 45                    |
| Wyoming                                      | ^                                   | ^                     | ^                                                                 | ^                                              | ^                                                                                    | ^                                                          | 51                    |
| <b>United States</b>                         | <b>6,947</b>                        | <b>130,930</b>        | <b>65</b>                                                         | <b>830 (803–857)</b>                           | <b>0.4 (0.4–0.4)</b>                                                                 | <b>119.5 (115.6–<br/>123.4)</b>                            | –                     |

Age-std., age-standardized; PYLL, Person-years of life lost.

Age-standardized PYLL and lost earning rates are age-adjusted to the 2000 U.S. Standard Population. Individual cancer sites at the national level are ordered by total lost earnings. States are ordered alphabetically. In the 'National-level results' section, rates by age group for all cancers combined are age-specific rates. Other rates are for the entire U.S. population, including ages <16 and >84 years. Head and neck cancers include cancers of the lip, oral cavity, pharynx, nose, nasal cavity, middle ear, and larynx. In the 'State-level results' section, the number of deaths, total PYLL, and total lost earnings for the United States were calculated by summing up corresponding numbers for all 50 states and the District of Columbia; using these numbers, average lost earnings per death and age-standardized PYLL and lost earning rates for the United States were calculated. Because lost earnings overall and by sex were from separate simulation models and due to rounding, lost earnings in men and women may not add up to totals.

^ Statistic not displayed due to fewer than 16 deaths.

**eTable 4. Lost Earnings (Calculated Based on Decedents' Education Level) for Major Cancer Sites in Ages 16-84 Years by Sex at the National- and State-Level, 2015**

| (eTable 4)<br>State, cancer   | Both sexes                      |                                                                    |                                         |            | Men                             |                                                                    |                                         |            | Women                           |                                                                    |                                         |            |
|-------------------------------|---------------------------------|--------------------------------------------------------------------|-----------------------------------------|------------|---------------------------------|--------------------------------------------------------------------|-----------------------------------------|------------|---------------------------------|--------------------------------------------------------------------|-----------------------------------------|------------|
|                               | Total lost earnings, million \$ | Age-std. lost earning rate, million \$ per 10 <sup>5</sup> persons | Average lost earnings, \$1000 per death | State rank | Total lost earnings, million \$ | Age-std. lost earning rate, million \$ per 10 <sup>5</sup> persons | Average lost earnings, \$1000 per death | State rank | Total lost earnings, million \$ | Age-std. lost earning rate, million \$ per 10 <sup>5</sup> persons | Average lost earnings, \$1000 per death | State rank |
| <b>National-level results</b> |                                 |                                                                    |                                         |            |                                 |                                                                    |                                         |            |                                 |                                                                    |                                         |            |
| All cancers                   | 86,612<br>(84,421–88,930)       | 23.8 (23.3–24.4)                                                   | 176.0<br>(171.5–180.7)                  | –          | 57,841<br>(55,741–59,996)       | 32.5 (31.4–33.7)                                                   | 218.5<br>(210.5–226.6)                  | –          | 28,745<br>(27,893–29,664)       | 15.9 (15.5–16.4)                                                   | 126.4<br>(122.7–130.5)                  | –          |
| <i>By age group</i>           |                                 |                                                                    |                                         |            |                                 |                                                                    |                                         |            |                                 |                                                                    |                                         |            |
| 16-39 years                   | 9,334<br>(9,242–9,419)          | 9.0 (8.9–9.1)                                                      | 1,044.6<br>(1,034.4–1,054.1)            | –          | 5,754<br>(5,677–5,822)          | 10.9 (10.8–11.1)                                                   | 1,331.9<br>(1,314.1–1,347.7)            | –          | 3,580<br>(3,532–3,628)          | 7.0 (6.9–7.1)                                                      | 775.8<br>(765.4–786.2)                  | –          |
| 40-49                         | 14,498<br>(14,322–14,671)       | 35.4 (35.0–35.8)                                                   | 696.8<br>(688.3–705.1)                  | –          | 8,391<br>(8,233–8,542)          | 41.3 (40.5–42.1)                                                   | 898.4<br>(881.5–914.6)                  | –          | 6,109<br>(6,006–6,212)          | 29.6 (29.1–30.1)                                                   | 532.7<br>(523.7–541.6)                  | –          |
| 50-59                         | 30,498<br>(29,894–31,108)       | 69.2 (67.9–70.6)                                                   | 384.0<br>(376.4–391.6)                  | –          | 19,950<br>(19,385–20,525)       | 92.7 (90.1–95.4)                                                   | 476.1<br>(462.6–489.8)                  | –          | 10,548<br>(10,293–10,822)       | 46.8 (45.7–48.0)                                                   | 281.1<br>(274.3–288.4)                  | –          |
| 60-69                         | 22,174<br>(21,197–23,160)       | 63.2 (60.4–66.0)                                                   | 151.2<br>(144.5–157.9)                  | –          | 16,082<br>(15,192–17,000)       | 96.4 (91.0–101.9)                                                  | 196.1<br>(185.3–207.3)                  | –          | 6,100<br>(5,755–6,466)          | 33.1 (31.3–35.1)                                                   | 94.3<br>(89.0–100.0)                    | –          |
| 70-79                         | 7,725<br>(6,935–8,552)          | 39.4 (35.4–43.6)                                                   | 47.5<br>(42.7–52.6)                     | –          | 5,853<br>(5,131–6,620)          | 65.8 (57.6–74.4)                                                   | 66.3<br>(58.1–74.9)                     | –          | 1,850<br>(1,619–2,099)          | 17.3 (15.1–19.6)                                                   | 25.0<br>(21.8–28.3)                     | –          |
| 80-84                         | 2,392<br>(2,233–2,569)          | 41.2 (38.5–44.3)                                                   | 32.4<br>(30.2–34.8)                     | –          | 1,821<br>(1,667–1,993)          | 75.5 (69.1–82.6)                                                   | 46.8<br>(42.9–51.3)                     | –          | 570 (527–621)                   | 16.8 (15.5–18.3)                                                   | 16.3<br>(15.1–17.8)                     | –          |
| Lung                          | 17,444<br>(16,904–18,026)       | 4.5 (4.4–4.6)                                                      | 130.3<br>(126.3–134.7)                  | –          | 12,419<br>(11,907–12,986)       | 6.6 (6.4–7.0)                                                      | 167.4<br>(160.5–175.0)                  | –          | 5,012<br>(4,834–5,205)          | 2.5 (2.4–2.6)                                                      | 84.0<br>(81.1–87.3)                     | –          |
| Colorectum                    | 8,751<br>(8,548–8,956)          | 2.5 (2.4–2.6)                                                      | 211.1<br>(206.2–216.1)                  | –          | 6,268<br>(6,072–6,465)          | 3.7 (3.5–3.8)                                                      | 269.9<br>(261.5–278.5)                  | –          | 2,479<br>(2,411–2,552)          | 1.4 (1.4–1.4)                                                      | 136.0<br>(132.2–140.0)                  | –          |



| (eTable 4)<br>State, cancer   | Both sexes                      |                                                                    |                                         |            | Men                             |                                                                    |                                         |            | Women                           |                                                                    |                                         |            |
|-------------------------------|---------------------------------|--------------------------------------------------------------------|-----------------------------------------|------------|---------------------------------|--------------------------------------------------------------------|-----------------------------------------|------------|---------------------------------|--------------------------------------------------------------------|-----------------------------------------|------------|
|                               | Total lost earnings, million \$ | Age-std. lost earning rate, million \$ per 10 <sup>5</sup> persons | Average lost earnings, \$1000 per death | State rank | Total lost earnings, million \$ | Age-std. lost earning rate, million \$ per 10 <sup>5</sup> persons | Average lost earnings, \$1000 per death | State rank | Total lost earnings, million \$ | Age-std. lost earning rate, million \$ per 10 <sup>5</sup> persons | Average lost earnings, \$1000 per death | State rank |
| Breast (female)               | –                               | –                                                                  | –                                       | –          | –                               | –                                                                  | –                                       | –          | 6,380<br>(6,210–6,562)          | 3.7 (3.6–3.8)                                                      | 185.5<br>(180.6–190.8)                  | –          |
| Pancreas                      | 5,930<br>(5,741–6,134)          | 1.6 (1.5–1.6)                                                      | 169.4<br>(164.0–175.2)                  | –          | 4,330<br>(4,144–4,512)          | 2.4 (2.3–2.5)                                                      | 228.8<br>(219.0–238.4)                  | –          | 1,599<br>(1,537–1,668)          | 0.8 (0.8–0.9)                                                      | 99.4<br>(95.6–103.7)                    | –          |
| Brain, other nervous system   | 4,711<br>(4,609–4,814)          | 1.4 (1.4–1.4)                                                      | 325.1<br>(318.1–332.3)                  | –          | 3,469<br>(3,370–3,568)          | 2.1 (2.0–2.1)                                                      | 420.0<br>(408.0–432.0)                  | –          | 1,241<br>(1,209–1,277)          | 0.7 (0.7–0.7)                                                      | 199.3<br>(194.0–205.0)                  | –          |
| Liver, intrahepatic bile duct | 4,603<br>(4,466–4,750)          | 1.2 (1.2–1.2)                                                      | 199.4<br>(193.4–205.8)                  | –          | 3,834<br>(3,698–3,978)          | 2.0 (2.0–2.1)                                                      | 237.5<br>(229.1–246.5)                  | –          | 768 (744–794)                   | 0.4 (0.4–0.4)                                                      | 110.6<br>(107.0–114.3)                  | –          |
| Leukemia                      | 3,585<br>(3,493–3,680)          | 1.0 (1.0–1.1)                                                      | 205.7<br>(200.4–211.1)                  | –          | 2,652<br>(2,563–2,742)          | 1.6 (1.5–1.6)                                                      | 249.6<br>(241.2–258.1)                  | –          | 931 (906–958)                   | 0.5 (0.5–0.6)                                                      | 136.8<br>(133.2–140.8)                  | –          |
| Lymphoma                      | 3,084<br>(2,998–3,172)          | 0.9 (0.9–0.9)                                                      | 187.0<br>(181.8–192.3)                  | –          | 2,373<br>(2,289–2,459)          | 1.4 (1.3–1.4)                                                      | 241.6<br>(233.0–250.4)                  | –          | 709 (687–734)                   | 0.4 (0.4–0.4)                                                      | 106.3<br>(103.0–110.1)                  | –          |
| Esophagus                     | 2,798<br>(2,703–2,896)          | 0.7 (0.7–0.8)                                                      | 206.9<br>(199.8–214.1)                  | –          | 2,543<br>(2,448–2,641)          | 1.4 (1.3–1.4)                                                      | 229.1<br>(220.6–237.9)                  | –          | 254 (246–263)                   | 0.1 (0.1–0.1)                                                      | 104.7<br>(101.2–108.4)                  | –          |
| Head & neck                   | 2,638<br>(2,560–2,718)          | 0.7 (0.7–0.7)                                                      | 215.7<br>(209.3–222.3)                  | –          | 2,273<br>(2,197–2,354)          | 1.2 (1.2–1.3)                                                      | 248.3<br>(239.9–257.0)                  | –          | 364 (354–375)                   | 0.2 (0.2–0.2)                                                      | 118.5<br>(115.0–122.1)                  | –          |
| Kidney, renal pelvis          | 2,421<br>(2,346–2,497)          | 0.7 (0.6–0.7)                                                      | 200.5<br>(194.3–206.9)                  | –          | 2,027<br>(1,952–2,102)          | 1.1 (1.1–1.2)                                                      | 244.8<br>(235.8–253.9)                  | –          | 393 (381–407)                   | 0.2 (0.2–0.2)                                                      | 103.7<br>(100.3–107.3)                  | –          |
| Prostate                      | –                               | –                                                                  | –                                       | –          | 2,385<br>(2,235–2,540)          | 1.3 (1.2–1.4)                                                      | 124.1<br>(116.2–132.1)                  | –          | –                               | –                                                                  | –                                       | –          |
| Stomach                       | 2,101<br>(2,052–2,152)          | 0.6 (0.6–0.6)                                                      | 222.7<br>(217.5–228.1)                  | –          | 1,557<br>(1,508–1,605)          | 0.9 (0.9–0.9)                                                      | 265.8<br>(257.4–274.1)                  | –          | 543 (530–558)                   | 0.3 (0.3–0.3)                                                      | 152.1<br>(148.4–156.0)                  | –          |

| (eTable 4)<br>State, cancer | Both sexes                      |                                                                    |                                         |            | Men                             |                                                                    |                                         |            | Women                           |                                                                    |                                         |            |
|-----------------------------|---------------------------------|--------------------------------------------------------------------|-----------------------------------------|------------|---------------------------------|--------------------------------------------------------------------|-----------------------------------------|------------|---------------------------------|--------------------------------------------------------------------|-----------------------------------------|------------|
|                             | Total lost earnings, million \$ | Age-std. lost earning rate, million \$ per 10 <sup>5</sup> persons | Average lost earnings, \$1000 per death | State rank | Total lost earnings, million \$ | Age-std. lost earning rate, million \$ per 10 <sup>5</sup> persons | Average lost earnings, \$1000 per death | State rank | Total lost earnings, million \$ | Age-std. lost earning rate, million \$ per 10 <sup>5</sup> persons | Average lost earnings, \$1000 per death | State rank |
| Melanoma (skin)             | 1,920 (1,870–1,972)             | 0.6 (0.5–0.6)                                                      | 261.7 (254.8–268.7)                     | –          | 1,479 (1,427–1,529)             | 0.9 (0.9–0.9)                                                      | 301.1 (290.7–311.4)                     | –          | 442 (431–454)                   | 0.3 (0.3–0.3)                                                      | 182.1 (177.7–187.0)                     | –          |
| Ovary                       | –                               | –                                                                  | –                                       | –          | –                               | –                                                                  | –                                       | –          | 1,713 (1,658–1,776)             | 0.9 (0.9–1.0)                                                      | 143.5 (138.9–148.8)                     | –          |
| Myeloma                     | 1,468 (1,415–1,522)             | 0.4 (0.4–0.4)                                                      | 147.2 (142.0–152.6)                     | –          | 1,092 (1,043–1,143)             | 0.6 (0.6–0.6)                                                      | 194.0 (185.2–203.0)                     | –          | 375 (360–393)                   | 0.2 (0.2–0.2)                                                      | 86.5 (83.0–90.6)                        | –          |
| Urinary Bladder             | 1,383 (1,326–1,445)             | 0.4 (0.3–0.4)                                                      | 123.9 (118.8–129.4)                     | –          | 1,170 (1,116–1,233)             | 0.6 (0.6–0.7)                                                      | 143.4 (136.8–151.0)                     | –          | 213 (205–222)                   | 0.1 (0.1–0.1)                                                      | 70.9 (68.2–73.8)                        | –          |
| Uterine corpus              | –                               | –                                                                  | –                                       | –          | –                               | –                                                                  | –                                       | –          | 1,091 (1,052–1,135)             | 0.6 (0.5–0.6)                                                      | 124.5 (120.0–129.4)                     | –          |
| Cervix                      | –                               | –                                                                  | –                                       | –          | –                               | –                                                                  | –                                       | –          | 1,011 (991–1,030)               | 0.6 (0.6–0.7)                                                      | 256.7 (251.8–261.8)                     | –          |
| <b>State-level results</b>  |                                 |                                                                    |                                         |            |                                 |                                                                    |                                         |            |                                 |                                                                    |                                         |            |
| <b>All cancers</b>          |                                 |                                                                    |                                         |            |                                 |                                                                    |                                         |            |                                 |                                                                    |                                         |            |
| Alabama                     | 1,553 (1,514–1,595)             | 27.5 (26.9–28.2)                                                   | 172.5 (168.1–177.2)                     | 6          | 1,065 (1,027–1,107)             | 38.9 (37.5–40.3)                                                   | 208.2 (200.7–216.4)                     | 4          | 487 (474–502)                   | 17.4 (17.0–17.9)                                                   | 125.3 (121.9–129.1)                     | 8          |
| Alaska                      | 176 (171–180)                   | 22.0 (21.5–22.6)                                                   | 199.6 (194.7–204.8)                     | 41         | 123 (119–127)                   | 30.1 (29.0–31.2)                                                   | 261.4 (252.6–270.0)                     | 37         | 52 (51–54)                      | 13.2 (12.8–13.7)                                                   | 128.1 (123.9–132.9)                     | 48         |
| Arizona                     | 1,722 (1,672–1,773)             | 22.9 (22.3–23.5)                                                   | 174.8 (169.7–179.9)                     | 33         | 1,172 (1,126–1,219)             | 31.6 (30.5–32.7)                                                   | 219.6 (210.9–228.4)                     | 26         | 549 (531–569)                   | 14.7 (14.3–15.2)                                                   | 121.6 (117.6–126.1)                     | 42         |
| Arkansas                    | 930 (906–956)                   | 27.7 (27.1–28.4)                                                   | 160.0 (155.9–164.6)                     | 4          | 637 (614–663)                   | 38.2 (36.9–39.6)                                                   | 192.3 (185.2–200.1)                     | 6          | 293 (285–301)                   | 18.2 (17.8–18.6)                                                   | 117.1 (113.9–120.4)                     | 3          |

| (eTable 4)<br>State, cancer | Both sexes                      |                                                                    |                                         |            | Men                             |                                                                    |                                         |            | Women                           |                                                                    |                                         |            |
|-----------------------------|---------------------------------|--------------------------------------------------------------------|-----------------------------------------|------------|---------------------------------|--------------------------------------------------------------------|-----------------------------------------|------------|---------------------------------|--------------------------------------------------------------------|-----------------------------------------|------------|
|                             | Total lost earnings, million \$ | Age-std. lost earning rate, million \$ per 10 <sup>5</sup> persons | Average lost earnings, \$1000 per death | State rank | Total lost earnings, million \$ | Age-std. lost earning rate, million \$ per 10 <sup>5</sup> persons | Average lost earnings, \$1000 per death | State rank | Total lost earnings, million \$ | Age-std. lost earning rate, million \$ per 10 <sup>5</sup> persons | Average lost earnings, \$1000 per death | State rank |
| California                  | 9,436<br>(9,185–9,698)          | 22.4 (21.8–23.0)                                                   | 197.0<br>(191.7–202.4)                  | 38         | 6,202<br>(5,966–6,438)          | 30.1 (28.9–31.3)                                                   | 245.7<br>(236.4–255.0)                  | 36         | 3,228<br>(3,132–3,338)          | 15.3 (14.9–15.8)                                                   | 142.5<br>(138.2–147.3)                  | 33         |
| Colorado                    | 1,243<br>(1,206–1,283)          | 20.5 (19.8–21.1)                                                   | 197.5<br>(191.6–203.8)                  | 50         | 829 (794–865)                   | 27.5 (26.3–28.8)                                                   | 247.2<br>(236.7–257.8)                  | 50         | 414 (401–430)                   | 13.9 (13.5–14.4)                                                   | 140.8<br>(136.2–146.1)                  | 47         |
| Connecticut                 | 909 (883–935)                   | 21.2 (20.6–21.8)                                                   | 173.5<br>(168.6–178.6)                  | 46         | 602 (578–626)                   | 28.8 (27.8–30.0)                                                   | 219.1<br>(210.5–227.8)                  | 45         | 306 (296–318)                   | 14.3 (13.9–14.9)                                                   | 123.0<br>(118.8–127.8)                  | 44         |
| Delaware                    | 252 (245–259)                   | 22.9 (22.4–23.5)                                                   | 150.7<br>(146.5–155.2)                  | 31         | 157 (150–163)                   | 27.9 (26.8–29.0)                                                   | 177.2<br>(169.8–184.9)                  | 49         | 95 (92–98)                      | 16.9 (16.4–17.3)                                                   | 120.7<br>(117.0–124.8)                  | 16         |
| District of Columbia        | 184 (179–190)                   | 27.3 (26.5–28.1)                                                   | 206.8<br>(200.8–212.9)                  | 8          | 112 (107–117)                   | 34.8 (33.3–36.5)                                                   | 256.4<br>(245.7–266.9)                  | 14         | 72 (70–75)                      | 20.9 (20.2–21.7)                                                   | 158.9<br>(153.3–165.4)                  | 1          |
| Florida                     | 6,029<br>(5,861–6,202)          | 24.7 (24.1–25.3)                                                   | 168.4<br>(163.7–173.2)                  | 18         | 4,078<br>(3,920–4,244)          | 34.0 (32.8–35.2)                                                   | 206.0<br>(198.0–214.4)                  | 17         | 1,946<br>(1,886–2,011)          | 16.3 (15.9–16.8)                                                   | 121.5<br>(117.8–125.6)                  | 24         |
| Georgia                     | 2,751<br>(2,685–2,821)          | 24.6 (24.0–25.2)                                                   | 186.6<br>(182.1–191.3)                  | 19         | 1,813<br>(1,749–1,878)          | 33.8 (32.6–35.1)                                                   | 225.2<br>(217.3–233.4)                  | 19         | 938 (912–965)                   | 16.5 (16.0–16.9)                                                   | 140.0<br>(136.3–144.1)                  | 23         |
| Hawaii                      | 355 (346–366)                   | 21.9 (21.3–22.4)                                                   | 181.3<br>(176.3–186.5)                  | 42         | 233 (224–242)                   | 28.9 (27.8–30.0)                                                   | 221.1<br>(212.6–229.6)                  | 44         | 122 (118–126)                   | 15.3 (14.8–15.8)                                                   | 134.5<br>(130.1–139.5)                  | 34         |
| Idaho                       | 398 (386–409)                   | 22.1 (21.5–22.7)                                                   | 170.5<br>(165.5–175.5)                  | 40         | 269 (259–281)                   | 29.7 (28.7–30.9)                                                   | 206.6<br>(198.5–215.2)                  | 39         | 128 (124–132)                   | 14.7 (14.3–15.2)                                                   | 124.4<br>(120.5–128.6)                  | 41         |
| Illinois                    | 3,627<br>(3,538–3,721)          | 25.0 (24.4–25.6)                                                   | 179.4<br>(174.9–184.1)                  | 17         | 2,399<br>(2,314–2,487)          | 33.9 (32.7–35.1)                                                   | 223.9<br>(216.1–232.1)                  | 18         | 1,226<br>(1,190–1,265)          | 16.9 (16.4–17.4)                                                   | 129.0<br>(125.2–133.1)                  | 14         |
| Indiana                     | 1,897<br>(1,850–1,948)          | 25.5 (24.9–26.2)                                                   | 167.2<br>(163.1–171.6)                  | 13         | 1,296<br>(1,250–1,344)          | 35.3 (34.1–36.6)                                                   | 209.3<br>(201.9–217.1)                  | 11         | 601 (584–618)                   | 16.5 (16.1–16.9)                                                   | 116.5<br>(113.2–119.8)                  | 22         |

| (eTable 4)<br>State, cancer | Both sexes                      |                                                                    |                                         |            | Men                             |                                                                    |                                         |            | Women                           |                                                                    |                                         |            |
|-----------------------------|---------------------------------|--------------------------------------------------------------------|-----------------------------------------|------------|---------------------------------|--------------------------------------------------------------------|-----------------------------------------|------------|---------------------------------|--------------------------------------------------------------------|-----------------------------------------|------------|
|                             | Total lost earnings, million \$ | Age-std. lost earning rate, million \$ per 10 <sup>5</sup> persons | Average lost earnings, \$1000 per death | State rank | Total lost earnings, million \$ | Age-std. lost earning rate, million \$ per 10 <sup>5</sup> persons | Average lost earnings, \$1000 per death | State rank | Total lost earnings, million \$ | Age-std. lost earning rate, million \$ per 10 <sup>5</sup> persons | Average lost earnings, \$1000 per death | State rank |
| Iowa                        | 832 (811–855)                   | 23.4 (22.9–24.0)                                                   | 159.5 (155.4–163.9)                     | 24         | 573 (552–595)                   | 32.6 (31.5–33.8)                                                   | 200.6 (193.4–208.4)                     | 22         | 260 (252–268)                   | 15.2 (14.8–15.6)                                                   | 109.8 (106.4–113.3)                     | 36         |
| Kansas                      | 801 (780–823)                   | 25.1 (24.5–25.8)                                                   | 177.3 (172.6–182.3)                     | 16         | 555 (534–576)                   | 35.2 (33.9–36.5)                                                   | 226.6 (218.2–235.4)                     | 12         | 246 (238–255)                   | 15.6 (15.2–16.1)                                                   | 118.8 (115.1–122.9)                     | 30         |
| Kentucky                    | 1,495 (1,456–1,537)             | 29.3 (28.6–30.0)                                                   | 166.9 (162.5–171.5)                     | 1          | 1,028 (991–1,068)               | 40.8 (39.4–42.3)                                                   | 208.1 (200.5–216.1)                     | 2          | 467 (454–481)                   | 18.6 (18.1–19.1)                                                   | 116.2 (112.9–119.6)                     | 2          |
| Louisiana                   | 1,414 (1,379–1,452)             | 27.0 (26.4–27.7)                                                   | 172.8 (168.4–177.4)                     | 9          | 962 (928–999)                   | 37.5 (36.2–38.9)                                                   | 210.7 (203.3–218.8)                     | 8          | 452 (439–465)                   | 17.6 (17.2–18.0)                                                   | 124.8 (121.4–128.4)                     | 7          |
| Maine                       | 413 (401–426)                   | 23.4 (22.8–24.0)                                                   | 148.9 (144.6–153.3)                     | 25         | 271 (260–282)                   | 30.9 (29.8–32.2)                                                   | 185.9 (178.4–193.9)                     | 31         | 142 (137–147)                   | 16.7 (16.2–17.1)                                                   | 107.6 (104.1–111.4)                     | 18         |
| Maryland                    | 1,606 (1,564–1,649)             | 23.2 (22.6–23.8)                                                   | 183.2 (178.5–188.1)                     | 27         | 1,023 (985–1,062)               | 30.9 (29.8–32.1)                                                   | 224.3 (215.8–232.8)                     | 32         | 582 (564–601)                   | 16.5 (16.1–17.0)                                                   | 138.4 (134.3–143.0)                     | 21         |
| Massachusetts               | 1,733 (1,682–1,785)             | 21.8 (21.2–22.4)                                                   | 173.0 (167.9–178.3)                     | 43         | 1,119 (1,073–1,165)             | 29.4 (28.2–30.7)                                                   | 217.4 (208.5–226.4)                     | 41         | 613 (592–636)                   | 15.1 (14.7–15.6)                                                   | 125.9 (121.7–130.6)                     | 37         |
| Michigan                    | 2,937 (2,864–3,015)             | 25.4 (24.8–26.0)                                                   | 171.1 (166.9–175.6)                     | 14         | 1,953 (1,882–2,025)             | 34.3 (33.1–35.5)                                                   | 213.7 (206.1–221.7)                     | 16         | 983 (954–1,014)                 | 17.2 (16.7–17.6)                                                   | 122.4 (118.8–126.3)                     | 11         |
| Minnesota                   | 1,427 (1,390–1,465)             | 23.2 (22.6–23.7)                                                   | 181.1 (176.4–185.9)                     | 28         | 972 (937–1,008)                 | 31.7 (30.7–32.9)                                                   | 231.9 (223.6–240.5)                     | 25         | 455 (441–470)                   | 14.9 (14.5–15.3)                                                   | 123.2 (119.4–127.3)                     | 40         |
| Mississippi                 | 971 (946–996)                   | 29.1 (28.4–29.8)                                                   | 173.8 (169.3–178.4)                     | 2          | 669 (645–694)                   | 41.7 (40.2–43.2)                                                   | 210.9 (203.5–218.9)                     | 1          | 301 (293–310)                   | 17.9 (17.4–18.4)                                                   | 124.8 (121.2–128.3)                     | 5          |
| Missouri                    | 1,815 (1,770–1,865)             | 25.7 (25.1–26.4)                                                   | 166.9 (162.8–171.6)                     | 12         | 1,216 (1,172–1,262)             | 35.0 (33.8–36.3)                                                   | 208.4 (200.9–216.4)                     | 13         | 599 (581–617)                   | 17.2 (16.8–17.7)                                                   | 118.8 (115.3–122.5)                     | 10         |

| (eTable 4)<br>State, cancer | Both sexes                      |                                                                    |                                         |            | Men                             |                                                                    |                                         |            | Women                           |                                                                    |                                         |            |
|-----------------------------|---------------------------------|--------------------------------------------------------------------|-----------------------------------------|------------|---------------------------------|--------------------------------------------------------------------|-----------------------------------------|------------|---------------------------------|--------------------------------------------------------------------|-----------------------------------------|------------|
|                             | Total lost earnings, million \$ | Age-std. lost earning rate, million \$ per 10 <sup>5</sup> persons | Average lost earnings, \$1000 per death | State rank | Total lost earnings, million \$ | Age-std. lost earning rate, million \$ per 10 <sup>5</sup> persons | Average lost earnings, \$1000 per death | State rank | Total lost earnings, million \$ | Age-std. lost earning rate, million \$ per 10 <sup>5</sup> persons | Average lost earnings, \$1000 per death | State rank |
| Montana                     | 313 (304–322)                   | 25.8 (25.1–26.4)                                                   | 179.5 (174.5–184.5)                     | 11         | 216 (208–224)                   | 35.6 (34.4–36.8)                                                   | 226.9 (218.4–235.6)                     | 10         | 97 (94–100)                     | 16.6 (16.2–17.1)                                                   | 122.4 (118.4–126.8)                     | 19         |
| Nebraska                    | 476 (463–489)                   | 23.1 (22.5–23.7)                                                   | 171.0 (166.6–175.7)                     | 30         | 321 (310–333)                   | 31.4 (30.3–32.5)                                                   | 215.2 (207.4–223.3)                     | 29         | 154 (150–159)                   | 15.2 (14.8–15.7)                                                   | 119.6 (116.0–123.5)                     | 35         |
| Nevada                      | 710 (690–730)                   | 21.4 (20.9–22.0)                                                   | 165.0 (160.4–169.8)                     | 45         | 478 (459–497)                   | 29.0 (27.9–30.1)                                                   | 208.2 (199.9–216.6)                     | 43         | 231 (224–239)                   | 14.3 (13.9–14.8)                                                   | 115.3 (111.7–119.1)                     | 45         |
| New Hampshire               | 389 (378–399)                   | 23.8 (23.2–24.4)                                                   | 169.3 (164.7–174.0)                     | 21         | 256 (246–266)                   | 31.4 (30.3–32.7)                                                   | 210.7 (202.5–218.9)                     | 28         | 132 (128–136)                   | 16.7 (16.3–17.2)                                                   | 122.4 (118.8–126.4)                     | 17         |
| New Jersey                  | 2,244 (2,185–2,306)             | 21.4 (20.9–22.0)                                                   | 173.4 (168.8–178.1)                     | 44         | 1,465 (1,409–1,522)             | 29.1 (28.0–30.2)                                                   | 222.0 (213.5–230.7)                     | 42         | 778 (755–804)                   | 14.7 (14.3–15.1)                                                   | 122.6 (118.9–126.6)                     | 43         |
| New Mexico                  | 521 (506–536)                   | 22.2 (21.6–22.8)                                                   | 171.3 (166.4–176.4)                     | 39         | 331 (317–345)                   | 28.4 (27.3–29.6)                                                   | 205.0 (196.6–213.6)                     | 46         | 189 (183–196)                   | 16.5 (16.1–17.0)                                                   | 132.7 (128.4–137.6)                     | 20         |
| New York                    | 5,062 (4,927–5,201)             | 22.4 (21.9–23.0)                                                   | 180.4 (175.6–185.4)                     | 37         | 3,282 (3,159–3,404)             | 30.3 (29.2–31.4)                                                   | 229.1 (220.5–237.6)                     | 35         | 1,776 (1,717–1,843)             | 15.5 (15.0–16.0)                                                   | 129.3 (125.1–134.2)                     | 31         |
| North Carolina              | 2,798 (2,728–2,875)             | 24.2 (23.6–24.8)                                                   | 170.0 (165.8–174.7)                     | 20         | 1,878 (1,810–1,951)             | 33.7 (32.6–35.0)                                                   | 209.1 (201.4–217.2)                     | 20         | 918 (890–947)                   | 15.8 (15.3–16.2)                                                   | 122.8 (119.2–126.8)                     | 27         |
| North Dakota                | 186 (181–191)                   | 22.9 (22.3–23.5)                                                   | 174.2 (169.5–179.0)                     | 32         | 123 (118–128)                   | 29.7 (28.6–30.9)                                                   | 207.6 (200.0–215.8)                     | 40         | 63 (61–65)                      | 17.0 (16.6–17.5)                                                   | 132.5 (128.8–136.4)                     | 12         |
| Ohio                        | 3,426 (3,339–3,519)             | 25.3 (24.7–25.9)                                                   | 162.5 (158.3–166.9)                     | 15         | 2,289 (2,206–2,377)             | 34.4 (33.2–35.7)                                                   | 203.1 (195.8–210.9)                     | 15         | 1,136 (1,104–1,169)             | 16.9 (16.5–17.4)                                                   | 115.7 (112.4–119.1)                     | 13         |
| Oklahoma                    | 1,229 (1,197–1,263)             | 28.7 (28.0–29.4)                                                   | 173.9 (169.4–178.7)                     | 3          | 852 (821–883)                   | 40.5 (39.2–42.0)                                                   | 217.3 (209.4–225.4)                     | 3          | 377 (365–389)                   | 17.8 (17.4–18.4)                                                   | 119.7 (116.1–123.5)                     | 6          |

| (eTable 4)<br>State, cancer | Both sexes                      |                                                                    |                                         |            | Men                             |                                                                    |                                         |            | Women                           |                                                                    |                                         |            |
|-----------------------------|---------------------------------|--------------------------------------------------------------------|-----------------------------------------|------------|---------------------------------|--------------------------------------------------------------------|-----------------------------------------|------------|---------------------------------|--------------------------------------------------------------------|-----------------------------------------|------------|
|                             | Total lost earnings, million \$ | Age-std. lost earning rate, million \$ per 10 <sup>5</sup> persons | Average lost earnings, \$1000 per death | State rank | Total lost earnings, million \$ | Age-std. lost earning rate, million \$ per 10 <sup>5</sup> persons | Average lost earnings, \$1000 per death | State rank | Total lost earnings, million \$ | Age-std. lost earning rate, million \$ per 10 <sup>5</sup> persons | Average lost earnings, \$1000 per death | State rank |
| Oregon                      | 1,115<br>(1,081–1,148)          | 23.4 (22.8–24.0)                                                   | 168.7<br>(163.6–173.8)                  | 26         | 740 (709–771)                   | 31.5 (30.3–32.7)                                                   | 211.0<br>(202.3–219.8)                  | 27         | 374 (362–389)                   | 15.9 (15.4–16.4)                                                   | 120.6<br>(116.6–125.3)                  | 26         |
| Pennsylvania                | 3,624<br>(3,530–3,726)          | 23.8 (23.3–24.4)                                                   | 158.5<br>(154.4–163.0)                  | 22         | 2,446<br>(2,356–2,542)          | 32.7 (31.6–33.9)                                                   | 199.9<br>(192.6–207.8)                  | 21         | 1,178<br>(1,143–1,214)          | 15.7 (15.3–16.1)                                                   | 110.9<br>(107.6–114.3)                  | 28         |
| Rhode Island                | 269 (261–277)                   | 20.6 (20.0–21.2)                                                   | 156.6<br>(152.1–161.2)                  | 49         | 184 (176–191)                   | 30.6 (29.4–31.9)                                                   | 197.6<br>(189.9–205.8)                  | 34         | 85 (82–88)                      | 12.6 (12.2–13.1)                                                   | 108.0<br>(104.3–111.9)                  | 50         |
| South Carolina              | 1,479<br>(1,441–1,521)          | 26.0 (25.4–26.6)                                                   | 172.0<br>(167.6–176.9)                  | 10         | 1,003<br>(967–1,043)            | 36.2 (34.9–37.5)                                                   | 208.8<br>(201.2–217.1)                  | 9          | 475 (461–489)                   | 16.9 (16.5–17.3)                                                   | 125.3<br>(121.6–129.1)                  | 15         |
| South Dakota                | 205 (199–211)                   | 20.8 (20.3–21.4)                                                   | 158.4<br>(154.2–163.1)                  | 47         | 139 (133–145)                   | 28.4 (27.3–29.5)                                                   | 191.6<br>(184.1–199.4)                  | 47         | 66 (64–68)                      | 14.2 (13.8–14.6)                                                   | 116.1<br>(112.7–119.8)                  | 46         |
| Tennessee                   | 2,104<br>(2,052–2,161)          | 27.5 (26.9–28.2)                                                   | 170.4<br>(166.2–175.1)                  | 5          | 1,426<br>(1,375–1,481)          | 38.2 (36.9–39.6)                                                   | 208.8<br>(201.3–216.8)                  | 5          | 677 (658–697)                   | 17.9 (17.5–18.4)                                                   | 122.8<br>(119.3–126.4)                  | 4          |
| Texas                       | 6,398<br>(6,243–6,559)          | 22.6 (22.1–23.2)                                                   | 191.5<br>(186.8–196.3)                  | 34         | 4,272<br>(4,122–4,423)          | 31.0 (29.9–32.1)                                                   | 234.8<br>(226.6–243.1)                  | 30         | 2,123<br>(2,065–2,185)          | 15.0 (14.6–15.4)                                                   | 139.4<br>(135.6–143.5)                  | 38         |
| Utah                        | 553 (538–567)                   | 20.6 (20.1–21.2)                                                   | 218.9<br>(213.1–224.8)                  | 48         | 374 (361–388)                   | 28.2 (27.2–29.3)                                                   | 274.3<br>(264.3–284.6)                  | 48         | 178 (173–184)                   | 13.1 (12.7–13.5)                                                   | 153.6<br>(148.9–158.4)                  | 49         |
| Vermont                     | 192 (186–198)                   | 23.1 (22.5–23.8)                                                   | 164.6<br>(159.4–170.1)                  | 29         | 131 (125–137)                   | 32.5 (31.1–33.8)                                                   | 208.6<br>(199.4–217.5)                  | 23         | 61 (59–64)                      | 15.7 (15.2–16.2)                                                   | 113.3<br>(109.3–117.9)                  | 29         |
| Virginia                    | 2,268<br>(2,209–2,328)          | 23.8 (23.2–24.4)                                                   | 182.1<br>(177.3–186.9)                  | 23         | 1,494<br>(1,438–1,551)          | 32.2 (31.1–33.5)                                                   | 223.1<br>(214.8–231.6)                  | 24         | 772 (750–797)                   | 16.1 (15.7–16.6)                                                   | 134.1<br>(130.2–138.4)                  | 25         |
| Washington                  | 1,858<br>(1,804–1,912)          | 22.5 (21.9–23.1)                                                   | 179.2<br>(174.0–184.4)                  | 36         | 1,233<br>(1,184–1,284)          | 30.1 (28.9–31.3)                                                   | 220.6<br>(211.8–229.6)                  | 38         | 623 (603–646)                   | 15.4 (15.0–15.9)                                                   | 130.5<br>(126.3–135.3)                  | 32         |

| (eTable 4)<br>State, cancer | Both sexes                      |                                                                    |                                         |            | Men                             |                                                                    |                                         |            | Women                           |                                                                    |                                         |            |
|-----------------------------|---------------------------------|--------------------------------------------------------------------|-----------------------------------------|------------|---------------------------------|--------------------------------------------------------------------|-----------------------------------------|------------|---------------------------------|--------------------------------------------------------------------|-----------------------------------------|------------|
|                             | Total lost earnings, million \$ | Age-std. lost earning rate, million \$ per 10 <sup>5</sup> persons | Average lost earnings, \$1000 per death | State rank | Total lost earnings, million \$ | Age-std. lost earning rate, million \$ per 10 <sup>5</sup> persons | Average lost earnings, \$1000 per death | State rank | Total lost earnings, million \$ | Age-std. lost earning rate, million \$ per 10 <sup>5</sup> persons | Average lost earnings, \$1000 per death | State rank |
| West Virginia               | 622 (604–641)                   | 27.3 (26.6–28.0)                                                   | 151.1 (146.7–155.8)                     | 7          | 430 (413–449)                   | 37.8 (36.5–39.2)                                                   | 188.7 (181.1–196.8)                     | 7          | 191 (186–197)                   | 17.4 (17.0–17.8)                                                   | 104.2 (101.2–107.6)                     | 9          |
| Wisconsin                   | 1,525 (1,486–1,566)             | 22.6 (22.1–23.1)                                                   | 166.5 (162.3–171.0)                     | 35         | 1,036 (998–1,075)               | 30.6 (29.6–31.7)                                                   | 207.1 (199.6–214.9)                     | 33         | 488 (474–504)                   | 14.9 (14.5–15.4)                                                   | 117.5 (114.0–121.3)                     | 39         |
| Wyoming                     | 123 (120–127)                   | 17.5 (17.0–18.0)                                                   | 161.4 (156.8–166.2)                     | 51         | 86 (83–90)                      | 25.6 (24.6–26.6)                                                   | 208.9 (200.9–217.3)                     | 51         | 37 (36–39)                      | 11.3 (11.0–11.7)                                                   | 105.5 (101.9–109.6)                     | 51         |
| <b>United States</b>        | <b>86,582 (84,391–88,900)</b>   | <b>23.8 (23.3–24.4)</b>                                            | <b>175.9 (171.5–180.6)</b>              | –          | <b>57,819 (55,720–59,972)</b>   | <b>32.5 (31.3–33.7)</b>                                            | <b>218.4 (210.4–226.6)</b>              | –          | <b>28,739 (27,886–29,659)</b>   | <b>15.9 (15.5–16.4)</b>                                            | <b>126.4 (122.6–130.4)</b>              | –          |
| <b>Lung, bronchus</b>       |                                 |                                                                    |                                         |            |                                 |                                                                    |                                         |            |                                 |                                                                    |                                         |            |
| Alabama                     | 376 (363–389)                   | 6.1 (5.9–6.3)                                                      | 137.3 (132.8–142.2)                     | 8          | 288 (276–302)                   | 9.9 (9.5–10.3)                                                     | 171.2 (163.9–179.1)                     | 3          | 87 (84–91)                      | 2.7 (2.6–2.8)                                                      | 83.0 (80.0–86.1)                        | 25         |
| Alaska                      | 35 (34–36)                      | 4.2 (4.1–4.4)                                                      | 144.9 (140.3–149.8)                     | 29         | 26 (25–27)                      | 6.1 (5.8–6.4)                                                      | 189.2 (181.6–197.5)                     | 29         | 9 (8–9)                         | 2.2 (2.1–2.3)                                                      | 85.2 (81.7–88.8)                        | 38         |
| Arizona                     | 307 (296–319)                   | 3.7 (3.6–3.9)                                                      | 119.6 (115.1–124.1)                     | 39         | 219 (209–231)                   | 5.5 (5.3–5.8)                                                      | 160.2 (152.9–168.6)                     | 36         | 88 (84–92)                      | 2.1 (2.0–2.2)                                                      | 73.0 (69.8–76.4)                        | 43         |
| Arkansas                    | 241 (233–251)                   | 6.6 (6.4–6.9)                                                      | 124.0 (119.8–128.9)                     | 2          | 176 (168–185)                   | 9.9 (9.5–10.4)                                                     | 152.6 (145.4–160.7)                     | 4          | 65 (63–67)                      | 3.7 (3.6–3.8)                                                      | 82.0 (79.3–84.9)                        | 2          |
| California                  | 1,360 (1,313–1,410)             | 3.1 (3.0–3.2)                                                      | 132.6 (128.0–137.4)                     | 47         | 953 (911–999)                   | 4.5 (4.3–4.8)                                                      | 172.1 (164.6–180.4)                     | 46         | 406 (390–424)                   | 1.8 (1.7–1.9)                                                      | 86.0 (82.5–89.8)                        | 47         |
| Colorado                    | 183 (176–189)                   | 2.9 (2.8–3.0)                                                      | 136.9 (132.3–141.8)                     | 48         | 126 (120–132)                   | 4.2 (4.0–4.4)                                                      | 190.5 (182.0–199.3)                     | 48         | 57 (54–59)                      | 1.7 (1.7–1.8)                                                      | 84.2 (80.8–88.0)                        | 48         |

| (eTable 4)<br>State, cancer | Both sexes                      |                                                                    |                                         |            | Men                             |                                                                    |                                         |            | Women                           |                                                                    |                                         |            |
|-----------------------------|---------------------------------|--------------------------------------------------------------------|-----------------------------------------|------------|---------------------------------|--------------------------------------------------------------------|-----------------------------------------|------------|---------------------------------|--------------------------------------------------------------------|-----------------------------------------|------------|
|                             | Total lost earnings, million \$ | Age-std. lost earning rate, million \$ per 10 <sup>5</sup> persons | Average lost earnings, \$1000 per death | State rank | Total lost earnings, million \$ | Age-std. lost earning rate, million \$ per 10 <sup>5</sup> persons | Average lost earnings, \$1000 per death | State rank | Total lost earnings, million \$ | Age-std. lost earning rate, million \$ per 10 <sup>5</sup> persons | Average lost earnings, \$1000 per death | State rank |
| Connecticut                 | 162 (156–167)                   | 3.4 (3.3–3.6)                                                      | 123.6 (119.6–128.0)                     | 44         | 110 (106–116)                   | 4.9 (4.7–5.2)                                                      | 164.4 (157.2–172.3)                     | 44         | 51 (49–53)                      | 2.1 (2.1–2.2)                                                      | 80.3 (77.0–83.9)                        | 40         |
| Delaware                    | 63 (61–65)                      | 5.7 (5.5–5.8)                                                      | 127.1 (123.3–131.3)                     | 11         | 42 (40–44)                      | 7.6 (7.3–7.9)                                                      | 153.8 (147.2–161.1)                     | 17         | 21 (20–21)                      | 3.6 (3.5–3.8)                                                      | 94.0 (90.9–97.3)                        | 3          |
| District of Columbia        | 31 (30–32)                      | 4.6 (4.5–4.8)                                                      | 180.1 (174.6–185.5)                     | 23         | 21 (20–22)                      | 6.9 (6.6–7.2)                                                      | 225.8 (216.6–235.2)                     | 22         | 10 (10–10)                      | 2.7 (2.6–2.8)                                                      | 125.3 (120.6–130.9)                     | 23         |
| Florida                     | 1,326 (1,284–1,373)             | 5.0 (4.9–5.2)                                                      | 130.2 (126.1–134.8)                     | 17         | 953 (913–998)                   | 7.5 (7.2–7.8)                                                      | 166.0 (158.9–173.7)                     | 18         | 372 (358–387)                   | 2.8 (2.7–2.8)                                                      | 83.7 (80.6–87.0)                        | 21         |
| Georgia                     | 574 (556–594)                   | 4.9 (4.7–5.1)                                                      | 142.3 (137.9–147.2)                     | 18         | 429 (411–448)                   | 7.8 (7.4–8.1)                                                      | 178.6 (171.3–186.5)                     | 15         | 145 (140–150)                   | 2.4 (2.3–2.4)                                                      | 88.9 (85.9–91.9)                        | 33         |
| Hawaii                      | 65 (63–67)                      | 3.7 (3.5–3.8)                                                      | 135.8 (131.1–140.6)                     | 41         | 48 (46–51)                      | 5.6 (5.4–5.8)                                                      | 174.1 (166.9–181.9)                     | 35         | 17 (16–17)                      | 1.8 (1.8–1.9)                                                      | 82.6 (78.9–86.8)                        | 46         |
| Idaho                       | 66 (63–68)                      | 3.3 (3.2–3.4)                                                      | 118.1 (113.8–122.9)                     | 46         | 46 (44–49)                      | 4.7 (4.5–5.0)                                                      | 154.3 (146.8–162.4)                     | 45         | 19 (18–20)                      | 2.0 (1.9–2.1)                                                      | 75.2 (72.0–78.4)                        | 45         |
| Illinois                    | 742 (719–766)                   | 4.8 (4.6–4.9)                                                      | 133.6 (129.6–138.1)                     | 21         | 530 (508–554)                   | 7.1 (6.8–7.4)                                                      | 172.9 (165.9–180.8)                     | 19         | 212 (204–220)                   | 2.7 (2.6–2.8)                                                      | 85.1 (82.1–88.3)                        | 24         |
| Indiana                     | 453 (439–469)                   | 5.8 (5.7–6.0)                                                      | 132.3 (128.3–136.9)                     | 10         | 321 (307–336)                   | 8.5 (8.2–8.9)                                                      | 171.2 (163.9–178.9)                     | 10         | 132 (127–137)                   | 3.4 (3.3–3.5)                                                      | 85.2 (82.3–88.2)                        | 7          |
| Iowa                        | 188 (182–195)                   | 4.9 (4.7–5.0)                                                      | 121.0 (117.0–125.4)                     | 19         | 135 (129–142)                   | 7.0 (6.7–7.4)                                                      | 153.3 (146.4–160.9)                     | 20         | 53 (51–55)                      | 2.9 (2.8–2.9)                                                      | 78.5 (75.7–81.6)                        | 18         |
| Kansas                      | 168 (163–174)                   | 4.8 (4.6–5.0)                                                      | 127.7 (123.7–132.1)                     | 20         | 118 (113–124)                   | 6.9 (6.6–7.2)                                                      | 165.1 (158.1–172.9)                     | 21         | 49 (48–51)                      | 2.9 (2.8–3.0)                                                      | 82.7 (79.6–86.0)                        | 15         |



| (eTable 4)<br>State, cancer | Both sexes                      |                                                                    |                                         |            | Men                             |                                                                    |                                         |            | Women                           |                                                                    |                                         |            |
|-----------------------------|---------------------------------|--------------------------------------------------------------------|-----------------------------------------|------------|---------------------------------|--------------------------------------------------------------------|-----------------------------------------|------------|---------------------------------|--------------------------------------------------------------------|-----------------------------------------|------------|
|                             | Total lost earnings, million \$ | Age-std. lost earning rate, million \$ per 10 <sup>5</sup> persons | Average lost earnings, \$1000 per death | State rank | Total lost earnings, million \$ | Age-std. lost earning rate, million \$ per 10 <sup>5</sup> persons | Average lost earnings, \$1000 per death | State rank | Total lost earnings, million \$ | Age-std. lost earning rate, million \$ per 10 <sup>5</sup> persons | Average lost earnings, \$1000 per death | State rank |
| Kentucky                    | 431 (417–446)                   | 7.8 (7.6–8.1)                                                      | 135.2 (130.7–140.1)                     | 1          | 315 (301–329)                   | 11.8 (11.2–12.3)                                                   | 172.6 (165.2–180.7)                     | 1          | 116 (112–120)                   | 4.2 (4.1–4.3)                                                      | 85.3 (82.3–88.3)                        | 1          |
| Louisiana                   | 335 (325–347)                   | 6.1 (5.9–6.3)                                                      | 139.4 (135.1–144.3)                     | 7          | 251 (240–262)                   | 9.5 (9.2–10.0)                                                     | 177.3 (169.9–185.2)                     | 6          | 84 (81–87)                      | 3.0 (2.9–3.1)                                                      | 85.1 (82.2–88.3)                        | 14         |
| Maine                       | 101 (98–105)                    | 5.2 (5.1–5.4)                                                      | 119.6 (115.8–124.0)                     | 15         | 73 (70–77)                      | 7.9 (7.6–8.3)                                                      | 160.2 (153.3–167.8)                     | 13         | 27 (26–29)                      | 2.7 (2.6–2.8)                                                      | 71.3 (68.6–74.3)                        | 22         |
| Maryland                    | 300 (291–309)                   | 4.1 (4.0–4.2)                                                      | 134.1 (130.1–138.4)                     | 31         | 204 (196–213)                   | 5.9 (5.7–6.2)                                                      | 172.6 (165.6–180.3)                     | 30         | 96 (92–99)                      | 2.5 (2.4–2.6)                                                      | 90.8 (87.6–93.9)                        | 29         |
| Massachusetts               | 336 (325–347)                   | 4.0 (3.8–4.1)                                                      | 123.8 (119.8–127.9)                     | 37         | 220 (210–231)                   | 5.5 (5.3–5.8)                                                      | 161.3 (154.1–169.1)                     | 37         | 116 (111–120)                   | 2.6 (2.5–2.7)                                                      | 85.6 (82.5–88.9)                        | 26         |
| Michigan                    | 682 (663–704)                   | 5.5 (5.3–5.6)                                                      | 136.4 (132.4–140.8)                     | 14         | 472 (453–494)                   | 7.8 (7.5–8.1)                                                      | 177.1 (169.9–185.0)                     | 14         | 210 (203–217)                   | 3.3 (3.2–3.4)                                                      | 89.7 (86.7–92.9)                        | 8          |
| Minnesota                   | 266 (257–275)                   | 4.0 (3.9–4.1)                                                      | 129.0 (124.9–133.4)                     | 36         | 184 (177–193)                   | 5.7 (5.5–6.0)                                                      | 171.8 (164.4–179.4)                     | 33         | 81 (78–84)                      | 2.4 (2.3–2.5)                                                      | 82.1 (79.1–85.5)                        | 32         |
| Mississippi                 | 235 (228–244)                   | 6.6 (6.4–6.8)                                                      | 135.9 (131.4–140.8)                     | 3          | 176 (168–184)                   | 10.4 (10.0–10.9)                                                   | 165.0 (157.8–172.8)                     | 2          | 59 (57–61)                      | 3.3 (3.2–3.4)                                                      | 89.2 (86.3–92.2)                        | 10         |
| Missouri                    | 445 (432–460)                   | 5.9 (5.7–6.1)                                                      | 128.7 (124.8–133.1)                     | 9          | 311 (297–325)                   | 8.5 (8.1–8.9)                                                      | 164.8 (157.6–172.4)                     | 11         | 134 (130–139)                   | 3.5 (3.4–3.6)                                                      | 85.4 (82.5–88.4)                        | 4          |
| Montana                     | 57 (55–59)                      | 4.2 (4.1–4.3)                                                      | 128.7 (124.4–133.4)                     | 28         | 38 (36–40)                      | 5.3 (5.0–5.6)                                                      | 164.7 (156.8–173.4)                     | 41         | 20 (19–20)                      | 3.2 (3.1–3.3)                                                      | 90.8 (87.4–94.4)                        | 11         |
| Nebraska                    | 101 (98–104)                    | 4.6 (4.4–4.7)                                                      | 128.8 (124.9–132.9)                     | 24         | 69 (66–72)                      | 6.3 (6.1–6.6)                                                      | 163.3 (156.6–170.6)                     | 26         | 32 (31–33)                      | 2.9 (2.8–3.0)                                                      | 88.6 (85.4–92.1)                        | 16         |

| (eTable 4)<br>State, cancer | Both sexes                      |                                                                    |                                         |            | Men                             |                                                                    |                                         |            | Women                           |                                                                    |                                         |            |
|-----------------------------|---------------------------------|--------------------------------------------------------------------|-----------------------------------------|------------|---------------------------------|--------------------------------------------------------------------|-----------------------------------------|------------|---------------------------------|--------------------------------------------------------------------|-----------------------------------------|------------|
|                             | Total lost earnings, million \$ | Age-std. lost earning rate, million \$ per 10 <sup>5</sup> persons | Average lost earnings, \$1000 per death | State rank | Total lost earnings, million \$ | Age-std. lost earning rate, million \$ per 10 <sup>5</sup> persons | Average lost earnings, \$1000 per death | State rank | Total lost earnings, million \$ | Age-std. lost earning rate, million \$ per 10 <sup>5</sup> persons | Average lost earnings, \$1000 per death | State rank |
| Nevada                      | 130 (125–135)                   | 3.7 (3.5–3.8)                                                      | 111.3 (107.1–115.8)                     | 40         | 90 (86–95)                      | 5.2 (4.9–5.5)                                                      | 147.2 (139.8–155.2)                     | 42         | 39 (38–41)                      | 2.3 (2.2–2.4)                                                      | 71.1 (68.3–74.2)                        | 34         |
| New Hampshire               | 82 (79–84)                      | 4.4 (4.3–4.6)                                                      | 120.7 (116.8–124.8)                     | 26         | 53 (51–56)                      | 5.9 (5.6–6.2)                                                      | 157.3 (150.1–164.9)                     | 31         | 28 (27–29)                      | 3.0 (2.9–3.1)                                                      | 83.9 (80.9–87.1)                        | 13         |
| New Jersey                  | 394 (382–407)                   | 3.5 (3.4–3.6)                                                      | 124.8 (121.0–129.0)                     | 43         | 272 (260–285)                   | 5.2 (4.9–5.4)                                                      | 166.3 (159.1–174.1)                     | 43         | 122 (117–127)                   | 2.1 (2.0–2.2)                                                      | 80.1 (77.2–83.3)                        | 42         |
| New Mexico                  | 73 (70–76)                      | 2.8 (2.7–2.9)                                                      | 109.9 (105.9–114.1)                     | 49         | 50 (48–53)                      | 4.1 (3.9–4.3)                                                      | 146.0 (138.9–153.5)                     | 49         | 23 (22–24)                      | 1.7 (1.6–1.8)                                                      | 71.5 (68.4–75.0)                        | 49         |
| New York                    | 966 (936–999)                   | 4.0 (3.9–4.2)                                                      | 133.9 (129.7–138.4)                     | 34         | 667 (639–697)                   | 5.9 (5.6–6.1)                                                      | 175.4 (168.0–183.2)                     | 32         | 298 (288–310)                   | 2.4 (2.3–2.5)                                                      | 87.5 (84.4–91.0)                        | 31         |
| North Carolina              | 626 (606–649)                   | 5.0 (4.9–5.2)                                                      | 127.6 (123.5–132.3)                     | 16         | 460 (440–481)                   | 7.8 (7.4–8.1)                                                      | 162.6 (155.6–170.4)                     | 16         | 167 (160–173)                   | 2.6 (2.5–2.7)                                                      | 80.0 (77.0–83.1)                        | 27         |
| North Dakota                | 27 (26–29)                      | 3.3 (3.2–3.5)                                                      | 107.9 (103.8–112.3)                     | 45         | 18 (17–19)                      | 4.5 (4.2–4.8)                                                      | 123.7 (117.4–130.9)                     | 47         | 9 (9–10)                        | 2.2 (2.2–2.3)                                                      | 86.2 (82.9–89.5)                        | 35         |
| Ohio                        | 823 (797–853)                   | 5.6 (5.4–5.8)                                                      | 129.8 (125.7–134.5)                     | 12         | 593 (567–621)                   | 8.4 (8.0–8.7)                                                      | 166.7 (159.4–174.4)                     | 12         | 230 (222–238)                   | 3.1 (3.0–3.2)                                                      | 82.7 (79.8–85.6)                        | 12         |
| Oklahoma                    | 291 (282–301)                   | 6.4 (6.2–6.6)                                                      | 131.2 (127.1–135.8)                     | 4          | 209 (201–219)                   | 9.6 (9.2–10.0)                                                     | 164.9 (158.1–172.6)                     | 5          | 81 (78–84)                      | 3.5 (3.4–3.7)                                                      | 85.8 (82.7–89.1)                        | 5          |
| Oregon                      | 196 (189–203)                   | 3.8 (3.6–3.9)                                                      | 116.9 (112.8–121.4)                     | 38         | 138 (131–145)                   | 5.5 (5.2–5.7)                                                      | 157.9 (150.4–165.9)                     | 39         | 58 (55–61)                      | 2.2 (2.1–2.3)                                                      | 72.1 (68.9–75.4)                        | 39         |
| Pennsylvania                | 773 (748–799)                   | 4.7 (4.6–4.9)                                                      | 123.1 (119.2–127.4)                     | 22         | 548 (523–574)                   | 6.9 (6.6–7.2)                                                      | 157.3 (150.4–164.8)                     | 23         | 225 (217–232)                   | 2.8 (2.7–2.9)                                                      | 80.3 (77.6–83.1)                        | 20         |

| (eTable 4)<br>State, cancer | Both sexes                      |                                                                    |                                         |            | Men                             |                                                                    |                                         |            | Women                           |                                                                    |                                         |            |
|-----------------------------|---------------------------------|--------------------------------------------------------------------|-----------------------------------------|------------|---------------------------------|--------------------------------------------------------------------|-----------------------------------------|------------|---------------------------------|--------------------------------------------------------------------|-----------------------------------------|------------|
|                             | Total lost earnings, million \$ | Age-std. lost earning rate, million \$ per 10 <sup>5</sup> persons | Average lost earnings, \$1000 per death | State rank | Total lost earnings, million \$ | Age-std. lost earning rate, million \$ per 10 <sup>5</sup> persons | Average lost earnings, \$1000 per death | State rank | Total lost earnings, million \$ | Age-std. lost earning rate, million \$ per 10 <sup>5</sup> persons | Average lost earnings, \$1000 per death | State rank |
| Rhode Island                | 55 (53–57)                      | 4.2 (4.0–4.3)                                                      | 112.7 (108.5–117.2)                     | 30         | 39 (37–41)                      | 6.4 (6.1–6.8)                                                      | 150.2 (142.9–158.3)                     | 25         | 16 (15–16)                      | 2.1 (2.0–2.2)                                                      | 69.3 (66.2–72.4)                        | 41         |
| South Carolina              | 345 (334–357)                   | 5.6 (5.4–5.8)                                                      | 137.6 (133.2–142.4)                     | 13         | 255 (244–267)                   | 8.7 (8.4–9.1)                                                      | 170.7 (163.6–178.8)                     | 9          | 90 (87–93)                      | 2.8 (2.7–2.9)                                                      | 88.8 (85.6–92.1)                        | 19         |
| South Dakota                | 43 (41–44)                      | 4.1 (3.9–4.2)                                                      | 116.5 (112.4–120.9)                     | 32         | 28 (27–30)                      | 5.4 (5.1–5.7)                                                      | 144.6 (137.5–152.4)                     | 40         | 14 (14–15)                      | 2.9 (2.8–3.0)                                                      | 84.3 (81.0–87.4)                        | 17         |
| Tennessee                   | 513 (496–532)                   | 6.3 (6.1–6.5)                                                      | 129.5 (125.3–134.3)                     | 5          | 369 (353–387)                   | 9.4 (9.0–9.9)                                                      | 163.7 (156.4–171.6)                     | 7          | 144 (139–149)                   | 3.4 (3.3–3.5)                                                      | 84.3 (81.4–87.4)                        | 6          |
| Texas                       | 1,068 (1,033–1,106)             | 3.6 (3.5–3.8)                                                      | 131.4 (127.1–136.1)                     | 42         | 767 (734–804)                   | 5.5 (5.2–5.7)                                                      | 165.5 (158.2–173.4)                     | 38         | 300 (289–311)                   | 2.0 (1.9–2.1)                                                      | 85.9 (82.8–89.2)                        | 44         |
| Utah                        | 63 (61–65)                      | 2.3 (2.2–2.4)                                                      | 154.1 (149.4–159.1)                     | 51         | 43 (41–45)                      | 3.2 (3.1–3.4)                                                      | 182.1 (174.4–190.2)                     | 51         | 20 (20–21)                      | 1.5 (1.4–1.6)                                                      | 116.6 (112.4–120.9)                     | 51         |
| Vermont                     | 36 (35–37)                      | 4.0 (3.9–4.2)                                                      | 115.7 (111.6–119.9)                     | 35         | 26 (25–27)                      | 6.2 (6.0–6.5)                                                      | 156.0 (148.9–163.8)                     | 28         | 10 (9–10)                       | 2.2 (2.1–2.3)                                                      | 68.4 (65.8–71.2)                        | 37         |
| Virginia                    | 463 (449–478)                   | 4.5 (4.4–4.7)                                                      | 136.1 (131.9–140.6)                     | 25         | 332 (318–347)                   | 6.8 (6.5–7.1)                                                      | 172.1 (164.9–179.9)                     | 24         | 131 (126–135)                   | 2.5 (2.4–2.6)                                                      | 88.8 (85.7–92.1)                        | 30         |
| Washington                  | 350 (339–363)                   | 4.0 (3.9–4.2)                                                      | 131.1 (126.8–135.6)                     | 33         | 241 (231–253)                   | 5.7 (5.4–6.0)                                                      | 168.5 (161.1–176.4)                     | 34         | 109 (105–113)                   | 2.5 (2.4–2.6)                                                      | 87.8 (84.6–91.3)                        | 28         |
| West Virginia               | 156 (150–162)                   | 6.2 (6.0–6.4)                                                      | 116.8 (112.3–121.9)                     | 6          | 115 (109–122)                   | 9.3 (8.9–9.8)                                                      | 143.0 (135.8–151.0)                     | 8          | 40 (39–42)                      | 3.3 (3.2–3.4)                                                      | 76.6 (73.8–79.5)                        | 9          |
| Wisconsin                   | 310 (300–321)                   | 4.2 (4.1–4.4)                                                      | 125.6 (121.5–129.9)                     | 27         | 226 (217–237)                   | 6.3 (6.0–6.6)                                                      | 165.4 (158.6–173.0)                     | 27         | 83 (80–87)                      | 2.2 (2.1–2.3)                                                      | 75.8 (72.9–78.9)                        | 36         |

| (eTable 4)<br>State, cancer | Both sexes                      |                                                                    |                                         |            | Men                             |                                                                    |                                         |            | Women                           |                                                                    |                                         |            |
|-----------------------------|---------------------------------|--------------------------------------------------------------------|-----------------------------------------|------------|---------------------------------|--------------------------------------------------------------------|-----------------------------------------|------------|---------------------------------|--------------------------------------------------------------------|-----------------------------------------|------------|
|                             | Total lost earnings, million \$ | Age-std. lost earning rate, million \$ per 10 <sup>5</sup> persons | Average lost earnings, \$1000 per death | State rank | Total lost earnings, million \$ | Age-std. lost earning rate, million \$ per 10 <sup>5</sup> persons | Average lost earnings, \$1000 per death | State rank | Total lost earnings, million \$ | Age-std. lost earning rate, million \$ per 10 <sup>5</sup> persons | Average lost earnings, \$1000 per death | State rank |
| Wyoming                     | 18 (18–19)                      | 2.6 (2.5–2.7)                                                      | 103.6 (99.9–107.8)                      | 50         | 13 (12–13)                      | 3.5 (3.4–3.7)                                                      | 143.9 (137.2–151.4)                     | 50         | 6 (6–6)                         | 1.6 (1.5–1.7)                                                      | 64.4 (61.4–67.8)                        | 50         |
| <b>United States</b>        | <b>17,428 (16,889–18,010)</b>   | <b>4.5 (4.4–4.6)</b>                                               | <b>130.3 (126.3–134.6)</b>              | –          | <b>12,406 (11,893–12,973)</b>   | <b>6.6 (6.4–7.0)</b>                                               | <b>167.2 (160.4–174.9)</b>              | –          | <b>5,009 (4,832–5,202)</b>      | <b>2.5 (2.4–2.6)</b>                                               | <b>84.0 (81.0–87.3)</b>                 | –          |
| <b>Breast (female)</b>      |                                 |                                                                    |                                         |            |                                 |                                                                    |                                         |            |                                 |                                                                    |                                         |            |
| Alabama                     | –                               | –                                                                  | –                                       | –          | –                               | –                                                                  | –                                       | –          | 108 (105–111)                   | 4.1 (4.0–4.2)                                                      | 173.3 (168.6–178.2)                     | 8          |
| Alaska                      | –                               | –                                                                  | –                                       | –          | –                               | –                                                                  | –                                       | –          | 10 (10–11)                      | 2.6 (2.6–2.7)                                                      | 189.6 (184.4–195.3)                     | 48         |
| Arizona                     | –                               | –                                                                  | –                                       | –          | –                               | –                                                                  | –                                       | –          | 124 (121–128)                   | 3.6 (3.5–3.6)                                                      | 175.0 (170.0–180.6)                     | 28         |
| Arkansas                    | –                               | –                                                                  | –                                       | –          | –                               | –                                                                  | –                                       | –          | 51 (50–52)                      | 3.3 (3.2–3.3)                                                      | 162.3 (158.3–166.7)                     | 41         |
| California                  | –                               | –                                                                  | –                                       | –          | –                               | –                                                                  | –                                       | –          | 765 (744–787)                   | 3.8 (3.7–3.9)                                                      | 206.4 (200.9–212.5)                     | 18         |
| Colorado                    | –                               | –                                                                  | –                                       | –          | –                               | –                                                                  | –                                       | –          | 99 (96–102)                     | 3.5 (3.4–3.6)                                                      | 205.9 (200.1–212.0)                     | 30         |
| Connecticut                 | –                               | –                                                                  | –                                       | –          | –                               | –                                                                  | –                                       | –          | 69 (67–71)                      | 3.4 (3.4–3.5)                                                      | 203.8 (198.4–209.8)                     | 33         |
| Delaware                    | –                               | –                                                                  | –                                       | –          | –                               | –                                                                  | –                                       | –          | 19 (18–19)                      | 3.2 (3.1–3.3)                                                      | 154.4 (149.6–159.4)                     | 42         |

| (eTable 4)<br>State, cancer | Both sexes                      |                                                                    |                                         |            | Men                             |                                                                    |                                         |            | Women                           |                                                                    |                                         |            |
|-----------------------------|---------------------------------|--------------------------------------------------------------------|-----------------------------------------|------------|---------------------------------|--------------------------------------------------------------------|-----------------------------------------|------------|---------------------------------|--------------------------------------------------------------------|-----------------------------------------|------------|
|                             | Total lost earnings, million \$ | Age-std. lost earning rate, million \$ per 10 <sup>5</sup> persons | Average lost earnings, \$1000 per death | State rank | Total lost earnings, million \$ | Age-std. lost earning rate, million \$ per 10 <sup>5</sup> persons | Average lost earnings, \$1000 per death | State rank | Total lost earnings, million \$ | Age-std. lost earning rate, million \$ per 10 <sup>5</sup> persons | Average lost earnings, \$1000 per death | State rank |
| District of Columbia        | –                               | –                                                                  | –                                       | –          | –                               | –                                                                  | –                                       | –          | 20 (19–21)                      | 6.2 (6.0–6.5)                                                      | 225.6 (217.5–235.1)                     | 1          |
| Florida                     | –                               | –                                                                  | –                                       | –          | –                               | –                                                                  | –                                       | –          | 429 (417–441)                   | 3.9 (3.8–4.0)                                                      | 179.6 (174.8–184.8)                     | 14         |
| Georgia                     | –                               | –                                                                  | –                                       | –          | –                               | –                                                                  | –                                       | –          | 231 (225–237)                   | 4.2 (4.1–4.3)                                                      | 211.2 (206.1–216.7)                     | 6          |
| Hawaii                      | –                               | –                                                                  | –                                       | –          | –                               | –                                                                  | –                                       | –          | 29 (28–29)                      | 3.7 (3.6–3.8)                                                      | 187.8 (182.5–193.7)                     | 21         |
| Idaho                       | –                               | –                                                                  | –                                       | –          | –                               | –                                                                  | –                                       | –          | 29 (28–30)                      | 3.5 (3.4–3.6)                                                      | 161.5 (156.9–166.8)                     | 31         |
| Illinois                    | –                               | –                                                                  | –                                       | –          | –                               | –                                                                  | –                                       | –          | 279 (272–287)                   | 4.0 (3.9–4.1)                                                      | 191.2 (186.1–196.8)                     | 12         |
| Indiana                     | –                               | –                                                                  | –                                       | –          | –                               | –                                                                  | –                                       | –          | 115 (112–118)                   | 3.4 (3.3–3.5)                                                      | 161.9 (157.8–166.2)                     | 35         |
| Iowa                        | –                               | –                                                                  | –                                       | –          | –                               | –                                                                  | –                                       | –          | 52 (51–53)                      | 3.2 (3.1–3.3)                                                      | 163.5 (159.3–168.2)                     | 43         |
| Kansas                      | –                               | –                                                                  | –                                       | –          | –                               | –                                                                  | –                                       | –          | 47 (46–48)                      | 3.0 (3.0–3.1)                                                      | 161.5 (157.0–166.2)                     | 46         |
| Kentucky                    | –                               | –                                                                  | –                                       | –          | –                               | –                                                                  | –                                       | –          | 86 (84–88)                      | 3.7 (3.6–3.8)                                                      | 171.7 (167.6–176.1)                     | 23         |
| Louisiana                   | –                               | –                                                                  | –                                       | –          | –                               | –                                                                  | –                                       | –          | 96 (94–99)                      | 4.0 (3.9–4.1)                                                      | 183.5 (179.1–188.3)                     | 13         |

| (eTable 4)<br>State, cancer | Both sexes                      |                                                                    |                                         |            | Men                             |                                                                    |                                         |            | Women                           |                                                                    |                                         |            |
|-----------------------------|---------------------------------|--------------------------------------------------------------------|-----------------------------------------|------------|---------------------------------|--------------------------------------------------------------------|-----------------------------------------|------------|---------------------------------|--------------------------------------------------------------------|-----------------------------------------|------------|
|                             | Total lost earnings, million \$ | Age-std. lost earning rate, million \$ per 10 <sup>5</sup> persons | Average lost earnings, \$1000 per death | State rank | Total lost earnings, million \$ | Age-std. lost earning rate, million \$ per 10 <sup>5</sup> persons | Average lost earnings, \$1000 per death | State rank | Total lost earnings, million \$ | Age-std. lost earning rate, million \$ per 10 <sup>5</sup> persons | Average lost earnings, \$1000 per death | State rank |
| Maine                       | –                               | –                                                                  | –                                       | –          | –                               | –                                                                  | –                                       | –          | 24 (24–25)                      | 2.9 (2.8–3.0)                                                      | 148.0 (143.6–152.5)                     | 47         |
| Maryland                    | –                               | –                                                                  | –                                       | –          | –                               | –                                                                  | –                                       | –          | 145 (141–150)                   | 4.3 (4.2–4.4)                                                      | 210.5 (204.7–216.4)                     | 4          |
| Massachusetts               | –                               | –                                                                  | –                                       | –          | –                               | –                                                                  | –                                       | –          | 127 (124–131)                   | 3.4 (3.3–3.4)                                                      | 197.0 (191.6–202.9)                     | 36         |
| Michigan                    | –                               | –                                                                  | –                                       | –          | –                               | –                                                                  | –                                       | –          | 194 (189–199)                   | 3.6 (3.5–3.7)                                                      | 171.8 (167.3–176.6)                     | 26         |
| Minnesota                   | –                               | –                                                                  | –                                       | –          | –                               | –                                                                  | –                                       | –          | 99 (96–101)                     | 3.4 (3.3–3.5)                                                      | 183.6 (178.6–188.9)                     | 34         |
| Mississippi                 | –                               | –                                                                  | –                                       | –          | –                               | –                                                                  | –                                       | –          | 62 (61–64)                      | 3.8 (3.7–3.9)                                                      | 173.2 (168.6–177.9)                     | 16         |
| Missouri                    | –                               | –                                                                  | –                                       | –          | –                               | –                                                                  | –                                       | –          | 124 (121–128)                   | 3.7 (3.6–3.8)                                                      | 170.5 (165.8–175.6)                     | 20         |
| Montana                     | –                               | –                                                                  | –                                       | –          | –                               | –                                                                  | –                                       | –          | 25 (24–25)                      | 4.7 (4.6–4.8)                                                      | 204.1 (198.4–210.3)                     | 3          |
| Nebraska                    | –                               | –                                                                  | –                                       | –          | –                               | –                                                                  | –                                       | –          | 26 (25–27)                      | 2.5 (2.5–2.6)                                                      | 152.2 (147.3–157.6)                     | 49         |
| Nevada                      | –                               | –                                                                  | –                                       | –          | –                               | –                                                                  | –                                       | –          | 51 (49–52)                      | 3.3 (3.2–3.4)                                                      | 163.8 (159.6–168.4)                     | 39         |
| New Hampshire               | –                               | –                                                                  | –                                       | –          | –                               | –                                                                  | –                                       | –          | 28 (28–29)                      | 3.7 (3.7–3.8)                                                      | 203.3 (198.2–208.8)                     | 19         |

| (eTable 4)<br>State, cancer | Both sexes                      |                                                                    |                                         |            | Men                             |                                                                    |                                         |            | Women                           |                                                                    |                                         |            |
|-----------------------------|---------------------------------|--------------------------------------------------------------------|-----------------------------------------|------------|---------------------------------|--------------------------------------------------------------------|-----------------------------------------|------------|---------------------------------|--------------------------------------------------------------------|-----------------------------------------|------------|
|                             | Total lost earnings, million \$ | Age-std. lost earning rate, million \$ per 10 <sup>5</sup> persons | Average lost earnings, \$1000 per death | State rank | Total lost earnings, million \$ | Age-std. lost earning rate, million \$ per 10 <sup>5</sup> persons | Average lost earnings, \$1000 per death | State rank | Total lost earnings, million \$ | Age-std. lost earning rate, million \$ per 10 <sup>5</sup> persons | Average lost earnings, \$1000 per death | State rank |
| New Jersey                  | –                               | –                                                                  | –                                       | –          | –                               | –                                                                  | –                                       | –          | 188 (182–193)                   | 3.7 (3.6–3.8)                                                      | 185.3 (180.1–190.8)                     | 25         |
| New Mexico                  | –                               | –                                                                  | –                                       | –          | –                               | –                                                                  | –                                       | –          | 37 (36–39)                      | 3.3 (3.2–3.4)                                                      | 168.3 (163.2–173.9)                     | 37         |
| New York                    | –                               | –                                                                  | –                                       | –          | –                               | –                                                                  | –                                       | –          | 389 (378–402)                   | 3.5 (3.4–3.6)                                                      | 188.1 (182.8–194.3)                     | 29         |
| North Carolina              | –                               | –                                                                  | –                                       | –          | –                               | –                                                                  | –                                       | –          | 219 (214–225)                   | 4.0 (3.9–4.1)                                                      | 186.4 (181.8–191.3)                     | 10         |
| North Dakota                | –                               | –                                                                  | –                                       | –          | –                               | –                                                                  | –                                       | –          | 18 (18–19)                      | 5.5 (5.4–5.7)                                                      | 247.0 (240.8–254.1)                     | 2          |
| Ohio                        | –                               | –                                                                  | –                                       | –          | –                               | –                                                                  | –                                       | –          | 246 (240–253)                   | 3.8 (3.8–3.9)                                                      | 166.1 (161.7–170.9)                     | 15         |
| Oklahoma                    | –                               | –                                                                  | –                                       | –          | –                               | –                                                                  | –                                       | –          | 75 (73–77)                      | 3.8 (3.7–3.9)                                                      | 165.2 (160.8–170.0)                     | 17         |
| Oregon                      | –                               | –                                                                  | –                                       | –          | –                               | –                                                                  | –                                       | –          | 73 (71–76)                      | 3.2 (3.1–3.3)                                                      | 164.4 (159.1–170.0)                     | 44         |
| Pennsylvania                | –                               | –                                                                  | –                                       | –          | –                               | –                                                                  | –                                       | –          | 257 (250–265)                   | 3.7 (3.6–3.8)                                                      | 160.0 (155.6–164.5)                     | 24         |
| Rhode Island                | –                               | –                                                                  | –                                       | –          | –                               | –                                                                  | –                                       | –          | 14 (13–14)                      | 2.3 (2.3–2.4)                                                      | 168.5 (163.5–174.4)                     | 51         |
| South Carolina              | –                               | –                                                                  | –                                       | –          | –                               | –                                                                  | –                                       | –          | 112 (110–115)                   | 4.3 (4.2–4.4)                                                      | 196.3 (191.3–201.5)                     | 5          |

| (eTable 4)<br>State, cancer | Both sexes                      |                                                                    |                                         |            | Men                             |                                                                    |                                         |            | Women                           |                                                                    |                                         |            |
|-----------------------------|---------------------------------|--------------------------------------------------------------------|-----------------------------------------|------------|---------------------------------|--------------------------------------------------------------------|-----------------------------------------|------------|---------------------------------|--------------------------------------------------------------------|-----------------------------------------|------------|
|                             | Total lost earnings, million \$ | Age-std. lost earning rate, million \$ per 10 <sup>5</sup> persons | Average lost earnings, \$1000 per death | State rank | Total lost earnings, million \$ | Age-std. lost earning rate, million \$ per 10 <sup>5</sup> persons | Average lost earnings, \$1000 per death | State rank | Total lost earnings, million \$ | Age-std. lost earning rate, million \$ per 10 <sup>5</sup> persons | Average lost earnings, \$1000 per death | State rank |
| South Dakota                | –                               | –                                                                  | –                                       | –          | –                               | –                                                                  | –                                       | –          | 14 (14–15)                      | 3.3 (3.2–3.4)                                                      | 175.3 (170.6–180.3)                     | 40         |
| Tennessee                   | –                               | –                                                                  | –                                       | –          | –                               | –                                                                  | –                                       | –          | 144 (141–149)                   | 4.0 (3.9–4.1)                                                      | 180.2 (175.6–185.1)                     | 11         |
| Texas                       | –                               | –                                                                  | –                                       | –          | –                               | –                                                                  | –                                       | –          | 493 (481–505)                   | 3.6 (3.5–3.7)                                                      | 201.6 (196.7–206.8)                     | 27         |
| Utah                        | –                               | –                                                                  | –                                       | –          | –                               | –                                                                  | –                                       | –          | 42 (40–43)                      | 3.1 (3.0–3.2)                                                      | 191.8 (186.3–197.9)                     | 45         |
| Vermont                     | –                               | –                                                                  | –                                       | –          | –                               | –                                                                  | –                                       | –          | 14 (14–15)                      | 3.7 (3.6–3.8)                                                      | 179.6 (173.1–187.2)                     | 22         |
| Virginia                    | –                               | –                                                                  | –                                       | –          | –                               | –                                                                  | –                                       | –          | 187 (182–193)                   | 4.0 (3.9–4.1)                                                      | 202.3 (196.7–208.1)                     | 9          |
| Washington                  | –                               | –                                                                  | –                                       | –          | –                               | –                                                                  | –                                       | –          | 128 (125–132)                   | 3.3 (3.2–3.4)                                                      | 176.5 (171.5–182.0)                     | 38         |
| West Virginia               | –                               | –                                                                  | –                                       | –          | –                               | –                                                                  | –                                       | –          | 41 (40–42)                      | 4.1 (4.1–4.2)                                                      | 171.9 (167.7–176.5)                     | 7          |
| Wisconsin                   | –                               | –                                                                  | –                                       | –          | –                               | –                                                                  | –                                       | –          | 105 (103–108)                   | 3.5 (3.4–3.6)                                                      | 186.6 (182.0–191.7)                     | 32         |
| Wyoming                     | –                               | –                                                                  | –                                       | –          | –                               | –                                                                  | –                                       | –          | 8 (7–8)                         | 2.5 (2.4–2.6)                                                      | 133.9 (129.3–138.9)                     | 50         |
| <b>United States</b>        | –                               | –                                                                  | –                                       | –          | –                               | –                                                                  | –                                       | –          | <b>6,369 (6,199–6,550)</b>      | <b>3.7 (3.6–3.8)</b>                                               | <b>185.3 (180.4–190.6)</b>              | –          |



| (eTable 4)<br>State, cancer | Both sexes                      |                                                                    |                                         |            | Men                             |                                                                    |                                         |            | Women                           |                                                                    |                                         |            |
|-----------------------------|---------------------------------|--------------------------------------------------------------------|-----------------------------------------|------------|---------------------------------|--------------------------------------------------------------------|-----------------------------------------|------------|---------------------------------|--------------------------------------------------------------------|-----------------------------------------|------------|
|                             | Total lost earnings, million \$ | Age-std. lost earning rate, million \$ per 10 <sup>5</sup> persons | Average lost earnings, \$1000 per death | State rank | Total lost earnings, million \$ | Age-std. lost earning rate, million \$ per 10 <sup>5</sup> persons | Average lost earnings, \$1000 per death | State rank | Total lost earnings, million \$ | Age-std. lost earning rate, million \$ per 10 <sup>5</sup> persons | Average lost earnings, \$1000 per death | State rank |
| <b>Colorectum</b>           |                                 |                                                                    |                                         |            |                                 |                                                                    |                                         |            |                                 |                                                                    |                                         |            |
| Alabama                     | 166 (162–170)                   | 3.1 (3.1–3.2)                                                      | 206.0 (201.4–210.8)                     | 4          | 115 (112–119)                   | 4.4 (4.3–4.5)                                                      | 253.4 (245.7–261.8)                     | 4          | 51 (50–52)                      | 1.9 (1.9–2.0)                                                      | 144.6 (140.9–148.4)                     | 3          |
| Alaska                      | 17 (16–17)                      | 2.2 (2.1–2.2)                                                      | 233.6 (228.5–238.9)                     | 42         | 12 (11–12)                      | 3.1 (3.0–3.2)                                                      | 341.2 (330.8–351.8)                     | 43         | 5 (5–5)                         | 1.2 (1.2–1.3)                                                      | 134.7 (130.3–139.3)                     | 38         |
| Arizona                     | 177 (172–181)                   | 2.5 (2.4–2.6)                                                      | 217.8 (212.3–223.4)                     | 24         | 135 (131–140)                   | 3.9 (3.8–4.0)                                                      | 283.7 (274.2–292.8)                     | 17         | 41 (40–43)                      | 1.1 (1.1–1.2)                                                      | 123.7 (119.9–127.5)                     | 45         |
| Arkansas                    | 98 (96–100)                     | 3.0 (2.9–3.1)                                                      | 200.7 (195.9–205.9)                     | 6          | 72 (69–74)                      | 4.4 (4.2–4.5)                                                      | 250.6 (242.5–259.2)                     | 7          | 26 (26–27)                      | 1.7 (1.7–1.7)                                                      | 130.1 (126.9–133.2)                     | 7          |
| California                  | 978 (955–1,000)                 | 2.4 (2.3–2.4)                                                      | 232.7 (227.4–238.0)                     | 34         | 689 (666–711)                   | 3.4 (3.3–3.5)                                                      | 298.6 (288.8–308.0)                     | 37         | 289 (281–297)                   | 1.4 (1.4–1.4)                                                      | 152.4 (148.2–156.9)                     | 28         |
| Colorado                    | 129 (125–132)                   | 2.2 (2.1–2.3)                                                      | 236.6 (230.6–242.9)                     | 40         | 94 (90–97)                      | 3.3 (3.1–3.4)                                                      | 305.2 (294.7–315.2)                     | 39         | 35 (34–36)                      | 1.2 (1.1–1.2)                                                      | 147.8 (143.1–152.9)                     | 42         |
| Connecticut                 | 72 (70–74)                      | 1.7 (1.7–1.8)                                                      | 179.4 (174.6–184.3)                     | 51         | 45 (44–47)                      | 2.3 (2.2–2.3)                                                      | 218.0 (209.8–226.1)                     | 51         | 26 (25–27)                      | 1.3 (1.3–1.3)                                                      | 137.1 (132.5–142.4)                     | 31         |
| Delaware                    | 23 (22–23)                      | 1.9 (1.9–2.0)                                                      | 170.2 (165.5–175.2)                     | 48         | 16 (15–17)                      | 2.7 (2.6–2.8)                                                      | 211.7 (203.5–220.1)                     | 49         | 7 (7–7)                         | 1.2 (1.2–1.2)                                                      | 117.5 (114.0–121.1)                     | 37         |
| District of Columbia        | 20 (20–21)                      | 2.9 (2.8–3.0)                                                      | 239.8 (233.9–246.0)                     | 8          | 14 (13–14)                      | 4.3 (4.1–4.4)                                                      | 287.0 (277.8–296.5)                     | 8          | 6 (6–7)                         | 1.6 (1.6–1.7)                                                      | 176.4 (168.9–184.6)                     | 8          |
| Florida                     | 571 (557–585)                   | 2.5 (2.4–2.5)                                                      | 197.6 (192.9–202.4)                     | 28         | 405 (392–419)                   | 3.6 (3.5–3.7)                                                      | 247.7 (239.7–256.0)                     | 26         | 165 (160–170)                   | 1.4 (1.4–1.5)                                                      | 131.9 (128.1–135.9)                     | 26         |

| (eTable 4)<br>State, cancer | Both sexes                      |                                                                    |                                         |            | Men                             |                                                                    |                                         |            | Women                           |                                                                    |                                         |            |
|-----------------------------|---------------------------------|--------------------------------------------------------------------|-----------------------------------------|------------|---------------------------------|--------------------------------------------------------------------|-----------------------------------------|------------|---------------------------------|--------------------------------------------------------------------|-----------------------------------------|------------|
|                             | Total lost earnings, million \$ | Age-std. lost earning rate, million \$ per 10 <sup>5</sup> persons | Average lost earnings, \$1000 per death | State rank | Total lost earnings, million \$ | Age-std. lost earning rate, million \$ per 10 <sup>5</sup> persons | Average lost earnings, \$1000 per death | State rank | Total lost earnings, million \$ | Age-std. lost earning rate, million \$ per 10 <sup>5</sup> persons | Average lost earnings, \$1000 per death | State rank |
| Georgia                     | 319 (311–326)                   | 2.9 (2.8–3.0)                                                      | 234.0 (228.6–239.3)                     | 9          | 231 (223–238)                   | 4.4 (4.3–4.5)                                                      | 288.9 (279.9–297.8)                     | 5          | 88 (86–90)                      | 1.5 (1.5–1.6)                                                      | 155.9 (151.9–160.1)                     | 15         |
| Hawaii                      | 38 (37–39)                      | 2.4 (2.3–2.4)                                                      | 233.2 (227.2–239.3)                     | 33         | 28 (27–29)                      | 3.6 (3.4–3.7)                                                      | 307.7 (297.0–318.0)                     | 27         | 10 (9–10)                       | 1.2 (1.2–1.3)                                                      | 137.8 (133.1–142.8)                     | 36         |
| Idaho                       | 41 (40–42)                      | 2.5 (2.4–2.5)                                                      | 237.5 (231.9–243.1)                     | 25         | 29 (28–30)                      | 3.5 (3.4–3.6)                                                      | 269.0 (260.8–277.0)                     | 30         | 12 (11–12)                      | 1.5 (1.4–1.5)                                                      | 183.5 (177.9–190.1)                     | 21         |
| Illinois                    | 377 (369–386)                   | 2.7 (2.6–2.7)                                                      | 205.5 (200.9–210.3)                     | 14         | 264 (256–273)                   | 3.8 (3.7–4.0)                                                      | 259.3 (251.3–267.5)                     | 21         | 113 (110–116)                   | 1.6 (1.6–1.7)                                                      | 138.2 (134.5–142.3)                     | 10         |
| Indiana                     | 173 (168–177)                   | 2.3 (2.3–2.4)                                                      | 183.0 (178.4–187.9)                     | 35         | 128 (124–132)                   | 3.5 (3.4–3.6)                                                      | 241.0 (233.3–249.6)                     | 29         | 45 (44–46)                      | 1.2 (1.2–1.2)                                                      | 108.7 (105.4–112.1)                     | 41         |
| Iowa                        | 79 (77–81)                      | 2.4 (2.4–2.5)                                                      | 187.6 (183.1–192.1)                     | 30         | 55 (53–57)                      | 3.4 (3.3–3.5)                                                      | 244.0 (235.9–251.8)                     | 32         | 24 (24–25)                      | 1.5 (1.4–1.5)                                                      | 122.9 (119.6–126.6)                     | 22         |
| Kansas                      | 80 (78–82)                      | 2.7 (2.6–2.8)                                                      | 216.0 (210.7–221.3)                     | 12         | 61 (59–63)                      | 4.2 (4.0–4.3)                                                      | 287.0 (278.1–296.0)                     | 10         | 19 (19–20)                      | 1.3 (1.2–1.3)                                                      | 121.8 (117.8–126.2)                     | 32         |
| Kentucky                    | 127 (124–131)                   | 2.6 (2.5–2.6)                                                      | 179.3 (175.0–184.1)                     | 19         | 90 (87–93)                      | 3.7 (3.6–3.8)                                                      | 225.4 (218.0–233.5)                     | 25         | 38 (37–39)                      | 1.5 (1.5–1.6)                                                      | 120.5 (117.3–123.9)                     | 16         |
| Louisiana                   | 132 (129–136)                   | 2.5 (2.5–2.6)                                                      | 179.3 (174.4–184.2)                     | 23         | 92 (88–95)                      | 3.5 (3.4–3.7)                                                      | 221.6 (213.6–230.4)                     | 28         | 40 (39–42)                      | 1.6 (1.6–1.6)                                                      | 125.0 (121.3–128.7)                     | 12         |
| Maine                       | 38 (37–39)                      | 2.3 (2.3–2.4)                                                      | 192.2 (187.1–197.4)                     | 36         | 25 (24–26)                      | 2.9 (2.8–3.0)                                                      | 242.6 (234.1–251.3)                     | 46         | 13 (12–13)                      | 1.7 (1.7–1.8)                                                      | 136.0 (131.1–141.7)                     | 6          |
| Maryland                    | 159 (156–163)                   | 2.4 (2.3–2.4)                                                      | 222.6 (217.2–227.9)                     | 31         | 109 (105–113)                   | 3.4 (3.3–3.5)                                                      | 279.6 (270.2–288.9)                     | 34         | 50 (49–52)                      | 1.5 (1.5–1.5)                                                      | 154.1 (149.9–158.4)                     | 19         |

| (eTable 4)<br>State, cancer | Both sexes                      |                                                                    |                                         |            | Men                             |                                                                    |                                         |            | Women                           |                                                                    |                                         |            |
|-----------------------------|---------------------------------|--------------------------------------------------------------------|-----------------------------------------|------------|---------------------------------|--------------------------------------------------------------------|-----------------------------------------|------------|---------------------------------|--------------------------------------------------------------------|-----------------------------------------|------------|
|                             | Total lost earnings, million \$ | Age-std. lost earning rate, million \$ per 10 <sup>5</sup> persons | Average lost earnings, \$1000 per death | State rank | Total lost earnings, million \$ | Age-std. lost earning rate, million \$ per 10 <sup>5</sup> persons | Average lost earnings, \$1000 per death | State rank | Total lost earnings, million \$ | Age-std. lost earning rate, million \$ per 10 <sup>5</sup> persons | Average lost earnings, \$1000 per death | State rank |
| Massachusetts               | 151 (148–154)                   | 2.0 (2.0–2.0)                                                      | 214.9 (210.1–219.6)                     | 47         | 106 (103–109)                   | 2.9 (2.8–3.0)                                                      | 293.1 (284.0–302.2)                     | 47         | 45 (44–46)                      | 1.2 (1.2–1.2)                                                      | 131.7 (128.1–135.6)                     | 39         |
| Michigan                    | 292 (285–299)                   | 2.7 (2.6–2.7)                                                      | 216.1 (211.1–221.2)                     | 18         | 206 (199–212)                   | 3.8 (3.7–3.9)                                                      | 271.1 (262.4–279.8)                     | 22         | 86 (84–88)                      | 1.6 (1.5–1.6)                                                      | 145.4 (141.4–149.4)                     | 14         |
| Minnesota                   | 136 (133–139)                   | 2.3 (2.2–2.3)                                                      | 228.3 (222.8–233.8)                     | 37         | 95 (92–98)                      | 3.2 (3.1–3.3)                                                      | 300.9 (291.0–310.9)                     | 41         | 41 (40–42)                      | 1.4 (1.4–1.5)                                                      | 146.7 (142.7–150.9)                     | 25         |
| Mississippi                 | 104 (101–106)                   | 3.2 (3.2–3.3)                                                      | 201.5 (196.9–206.6)                     | 2          | 71 (68–73)                      | 4.5 (4.4–4.7)                                                      | 241.8 (234.1–250.2)                     | 3          | 33 (32–34)                      | 2.0 (2.0–2.1)                                                      | 148.7 (144.7–152.4)                     | 1          |
| Missouri                    | 170 (166–174)                   | 2.6 (2.5–2.6)                                                      | 195.4 (191.0–200.0)                     | 20         | 123 (119–126)                   | 3.8 (3.7–3.9)                                                      | 261.5 (253.8–269.5)                     | 20         | 47 (45–48)                      | 1.4 (1.3–1.4)                                                      | 117.5 (114.1–121.1)                     | 29         |
| Montana                     | 35 (34–36)                      | 3.2 (3.1–3.2)                                                      | 245.8 (239.4–252.5)                     | 3          | 29 (28–30)                      | 5.3 (5.2–5.4)                                                      | 344.6 (334.4–355.5)                     | 1          | 6 (6–6)                         | 1.0 (1.0–1.1)                                                      | 105.3 (101.4–109.7)                     | 47         |
| Nebraska                    | 47 (46–49)                      | 2.5 (2.4–2.5)                                                      | 193.6 (188.4–199.1)                     | 27         | 38 (37–40)                      | 4.0 (3.9–4.1)                                                      | 263.7 (254.8–272.7)                     | 15         | 9 (9–10)                        | 1.0 (0.9–1.0)                                                      | 92.0 (89.1–95.1)                        | 49         |
| Nevada                      | 91 (89–93)                      | 2.9 (2.9–3.0)                                                      | 219.6 (214.5–224.6)                     | 7          | 67 (65–69)                      | 4.4 (4.2–4.5)                                                      | 278.7 (270.1–287.3)                     | 6          | 24 (23–24)                      | 1.5 (1.5–1.5)                                                      | 136.9 (133.2–140.6)                     | 18         |
| New Hampshire               | 28 (27–29)                      | 1.8 (1.8–1.9)                                                      | 187.4 (182.1–192.6)                     | 50         | 20 (19–20)                      | 2.4 (2.3–2.5)                                                      | 238.3 (228.9–247.5)                     | 50         | 8 (8–9)                         | 1.2 (1.2–1.3)                                                      | 124.9 (121.8–128.6)                     | 34         |
| New Jersey                  | 252 (246–258)                   | 2.5 (2.4–2.5)                                                      | 219.2 (213.7–224.6)                     | 26         | 191 (184–197)                   | 3.9 (3.7–4.0)                                                      | 289.5 (280.1–298.8)                     | 19         | 61 (60–63)                      | 1.2 (1.2–1.2)                                                      | 125.0 (121.5–128.8)                     | 40         |
| New Mexico                  | 59 (58–61)                      | 2.7 (2.6–2.8)                                                      | 213.8 (208.6–219.2)                     | 13         | 38 (37–40)                      | 3.5 (3.4–3.6)                                                      | 236.7 (228.2–245.3)                     | 31         | 21 (20–22)                      | 2.0 (2.0–2.1)                                                      | 181.6 (176.4–187.1)                     | 2          |

| (eTable 4)<br>State, cancer | Both sexes                      |                                                                    |                                         |            | Men                             |                                                                    |                                         |            | Women                           |                                                                    |                                         |            |
|-----------------------------|---------------------------------|--------------------------------------------------------------------|-----------------------------------------|------------|---------------------------------|--------------------------------------------------------------------|-----------------------------------------|------------|---------------------------------|--------------------------------------------------------------------|-----------------------------------------|------------|
|                             | Total lost earnings, million \$ | Age-std. lost earning rate, million \$ per 10 <sup>5</sup> persons | Average lost earnings, \$1000 per death | State rank | Total lost earnings, million \$ | Age-std. lost earning rate, million \$ per 10 <sup>5</sup> persons | Average lost earnings, \$1000 per death | State rank | Total lost earnings, million \$ | Age-std. lost earning rate, million \$ per 10 <sup>5</sup> persons | Average lost earnings, \$1000 per death | State rank |
| New York                    | 472 (461–483)                   | 2.1 (2.1–2.2)                                                      | 201.7 (196.9–206.6)                     | 43         | 340 (329–351)                   | 3.2 (3.1–3.3)                                                      | 267.0 (258.7–275.5)                     | 40         | 132 (128–136)                   | 1.2 (1.1–1.2)                                                      | 123.6 (119.9–127.8)                     | 43         |
| North Carolina              | 298 (292–305)                   | 2.7 (2.7–2.8)                                                      | 222.9 (218.0–227.9)                     | 11         | 217 (211–224)                   | 4.1 (4.0–4.3)                                                      | 288.8 (280.4–297.3)                     | 11         | 81 (79–83)                      | 1.4 (1.4–1.5)                                                      | 138.0 (134.2–142.0)                     | 24         |
| North Dakota                | 20 (19–21)                      | 2.4 (2.3–2.5)                                                      | 224.4 (217.6–231.1)                     | 32         | 18 (17–18)                      | 4.2 (4.1–4.3)                                                      | 289.2 (279.5–298.9)                     | 9          | 2 (2–2)                         | 0.5 (0.5–0.5)                                                      | 82.9 (80.1–86.1)                        | 51         |
| Ohio                        | 320 (312–327)                   | 2.4 (2.4–2.5)                                                      | 186.6 (182.2–191.2)                     | 29         | 218 (211–226)                   | 3.4 (3.3–3.5)                                                      | 236.9 (229.0–245.1)                     | 35         | 101 (98–104)                    | 1.6 (1.5–1.6)                                                      | 127.9 (124.4–131.5)                     | 13         |
| Oklahoma                    | 146 (143–150)                   | 3.5 (3.5–3.6)                                                      | 213.9 (208.9–219.3)                     | 1          | 108 (105–111)                   | 5.3 (5.1–5.4)                                                      | 276.6 (268.2–285.4)                     | 2          | 38 (37–39)                      | 1.9 (1.8–1.9)                                                      | 129.9 (126.1–133.8)                     | 5          |
| Oregon                      | 100 (97–102)                    | 2.2 (2.1–2.3)                                                      | 193.2 (188.1–198.4)                     | 41         | 70 (68–73)                      | 3.2 (3.1–3.3)                                                      | 246.4 (237.6–255.2)                     | 42         | 29 (28–30)                      | 1.2 (1.2–1.3)                                                      | 127.1 (122.8–131.9)                     | 33         |
| Pennsylvania                | 364 (356–373)                   | 2.6 (2.5–2.6)                                                      | 188.8 (184.4–193.4)                     | 22         | 262 (254–270)                   | 3.7 (3.6–3.8)                                                      | 249.2 (241.1–257.0)                     | 24         | 102 (100–105)                   | 1.5 (1.4–1.5)                                                      | 116.4 (113.4–119.5)                     | 23         |
| Rhode Island                | 22 (22–23)                      | 1.9 (1.9–2.0)                                                      | 191.3 (186.3–196.4)                     | 49         | 17 (16–17)                      | 3.0 (2.9–3.1)                                                      | 241.4 (233.4–249.9)                     | 45         | 6 (6–6)                         | 1.0 (0.9–1.0)                                                      | 119.0 (115.4–123.1)                     | 50         |
| South Carolina              | 149 (145–152)                   | 2.8 (2.7–2.8)                                                      | 205.9 (201.1–210.8)                     | 10         | 107 (103–110)                   | 4.1 (4.0–4.2)                                                      | 262.7 (254.1–271.3)                     | 13         | 42 (41–43)                      | 1.6 (1.6–1.6)                                                      | 133.2 (130.1–136.4)                     | 11         |
| South Dakota                | 22 (21–23)                      | 2.3 (2.2–2.3)                                                      | 173.1 (168.4–177.7)                     | 38         | 16 (16–17)                      | 3.4 (3.3–3.5)                                                      | 216.9 (209.7–224.5)                     | 33         | 6 (6–6)                         | 1.1 (1.0–1.1)                                                      | 111.7 (107.4–116.6)                     | 46         |
| Tennessee                   | 197 (192–201)                   | 2.7 (2.6–2.7)                                                      | 191.9 (187.4–196.5)                     | 17         | 135 (130–139)                   | 3.8 (3.7–3.9)                                                      | 238.5 (231.0–246.9)                     | 23         | 62 (60–64)                      | 1.6 (1.6–1.7)                                                      | 134.6 (130.9–138.4)                     | 9          |

| (eTable 4)<br>State, cancer | Both sexes                      |                                                                    |                                         |            | Men                             |                                                                    |                                         |            | Women                           |                                                                    |                                         |            |
|-----------------------------|---------------------------------|--------------------------------------------------------------------|-----------------------------------------|------------|---------------------------------|--------------------------------------------------------------------|-----------------------------------------|------------|---------------------------------|--------------------------------------------------------------------|-----------------------------------------|------------|
|                             | Total lost earnings, million \$ | Age-std. lost earning rate, million \$ per 10 <sup>5</sup> persons | Average lost earnings, \$1000 per death | State rank | Total lost earnings, million \$ | Age-std. lost earning rate, million \$ per 10 <sup>5</sup> persons | Average lost earnings, \$1000 per death | State rank | Total lost earnings, million \$ | Age-std. lost earning rate, million \$ per 10 <sup>5</sup> persons | Average lost earnings, \$1000 per death | State rank |
| Texas                       | 742 (726–759)                   | 2.7 (2.6–2.7)                                                      | 238.9 (233.7–244.3)                     | 16         | 550 (534–566)                   | 4.0 (3.9–4.2)                                                      | 301.4 (292.8–310.3)                     | 14         | 192 (187–197)                   | 1.4 (1.3–1.4)                                                      | 149.8 (146.0–153.9)                     | 30         |
| Utah                        | 53 (52–55)                      | 2.1 (2.0–2.1)                                                      | 248.2 (241.9–255.4)                     | 45         | 35 (33–36)                      | 2.7 (2.6–2.8)                                                      | 320.2 (308.0–332.9)                     | 48         | 19 (18–19)                      | 1.5 (1.4–1.5)                                                      | 175.2 (170.9–179.6)                     | 20         |
| Vermont                     | 20 (20–21)                      | 3.0 (2.9–3.0)                                                      | 209.2 (204.5–214.2)                     | 5          | 14 (13–14)                      | 4.1 (4.0–4.2)                                                      | 260.6 (252.4–268.8)                     | 12         | 6 (6–6)                         | 1.9 (1.9–2.0)                                                      | 145.8 (141.1–151.1)                     | 4          |
| Virginia                    | 245 (239–250)                   | 2.7 (2.6–2.7)                                                      | 230.0 (224.8–235.2)                     | 15         | 177 (172–182)                   | 3.9 (3.8–4.0)                                                      | 287.3 (278.7–296.2)                     | 18         | 68 (66–70)                      | 1.5 (1.5–1.6)                                                      | 151.2 (147.4–155.1)                     | 17         |
| Washington                  | 174 (170–178)                   | 2.2 (2.2–2.3)                                                      | 227.8 (222.2–233.1)                     | 39         | 129 (125–133)                   | 3.3 (3.2–3.4)                                                      | 298.9 (289.5–308.5)                     | 38         | 45 (44–47)                      | 1.1 (1.1–1.2)                                                      | 135.8 (131.7–140.1)                     | 44         |
| West Virginia               | 55 (54–57)                      | 2.6 (2.5–2.6)                                                      | 153.9 (149.6–158.4)                     | 21         | 41 (39–43)                      | 3.9 (3.8–4.1)                                                      | 212.1 (204.5–220.4)                     | 16         | 14 (14–15)                      | 1.2 (1.2–1.3)                                                      | 86.7 (83.8–90.0)                        | 35         |
| Wisconsin                   | 136 (132–139)                   | 2.0 (2.0–2.1)                                                      | 201.6 (196.4–206.8)                     | 46         | 102 (99–106)                    | 3.1 (3.0–3.2)                                                      | 258.0 (249.6–266.6)                     | 44         | 34 (33–35)                      | 1.0 (1.0–1.0)                                                      | 121.0 (117.5–124.4)                     | 48         |
| Wyoming                     | 15 (14–15)                      | 2.1 (2.1–2.2)                                                      | 200.4 (195.1–206.2)                     | 44         | 11 (10–11)                      | 3.4 (3.3–3.5)                                                      | 268.7 (259.2–278.7)                     | 36         | 4 (4–4)                         | 1.4 (1.4–1.5)                                                      | 119.9 (116.3–124.0)                     | 27         |
| <b>United States</b>        | <b>8,730 (8,527–8,934)</b>      | <b>2.5 (2.4–2.5)</b>                                               | <b>210.7 (205.8–215.6)</b>              | –          | <b>6,256 (6,061–6,453)</b>      | <b>3.7 (3.5–3.8)</b>                                               | <b>269.6 (261.2–278.1)</b>              | –          | <b>2,470 (2,401–2,542)</b>      | <b>1.4 (1.4–1.4)</b>                                               | <b>135.5 (131.8–139.5)</b>              | –          |
| <b>Prostate</b>             |                                 |                                                                    |                                         |            |                                 |                                                                    |                                         |            |                                 |                                                                    |                                         |            |
| Alabama                     | –                               | –                                                                  | –                                       | –          | 40 (38–43)                      | 1.4 (1.3–1.5)                                                      | 108.6 (101.9–115.9)                     | 11         | –                               | –                                                                  | –                                       | –          |

| (eTable 4)<br>State, cancer | Both sexes                      |                                                                    |                                         |            | Men                             |                                                                    |                                         |            | Women                           |                                                                    |                                         |            |
|-----------------------------|---------------------------------|--------------------------------------------------------------------|-----------------------------------------|------------|---------------------------------|--------------------------------------------------------------------|-----------------------------------------|------------|---------------------------------|--------------------------------------------------------------------|-----------------------------------------|------------|
|                             | Total lost earnings, million \$ | Age-std. lost earning rate, million \$ per 10 <sup>5</sup> persons | Average lost earnings, \$1000 per death | State rank | Total lost earnings, million \$ | Age-std. lost earning rate, million \$ per 10 <sup>5</sup> persons | Average lost earnings, \$1000 per death | State rank | Total lost earnings, million \$ | Age-std. lost earning rate, million \$ per 10 <sup>5</sup> persons | Average lost earnings, \$1000 per death | State rank |
| Alaska                      | –                               | –                                                                  | –                                       | –          | 4 (4–5)                         | 1.0 (0.9–1.1)                                                      | 169.3 (159.6–179.5)                     | 45         | –                               | –                                                                  | –                                       | –          |
| Arizona                     | –                               | –                                                                  | –                                       | –          | 55 (51–59)                      | 1.3 (1.2–1.4)                                                      | 120.4 (111.8–129.1)                     | 21         | –                               | –                                                                  | –                                       | –          |
| Arkansas                    | –                               | –                                                                  | –                                       | –          | 21 (20–22)                      | 1.2 (1.1–1.2)                                                      | 94.0 (88.6–100.1)                       | 33         | –                               | –                                                                  | –                                       | –          |
| California                  | –                               | –                                                                  | –                                       | –          | 295 (276–313)                   | 1.5 (1.4–1.6)                                                      | 138.6 (129.9–147.1)                     | 10         | –                               | –                                                                  | –                                       | –          |
| Colorado                    | –                               | –                                                                  | –                                       | –          | 52 (48–56)                      | 1.7 (1.6–1.9)                                                      | 165.6 (152.8–178.9)                     | 1          | –                               | –                                                                  | –                                       | –          |
| Connecticut                 | –                               | –                                                                  | –                                       | –          | 26 (25–28)                      | 1.2 (1.1–1.3)                                                      | 133.0 (124.4–141.6)                     | 26         | –                               | –                                                                  | –                                       | –          |
| Delaware                    | –                               | –                                                                  | –                                       | –          | 6 (6–7)                         | 1.0 (0.9–1.1)                                                      | 115.5 (108.4–123.3)                     | 46         | –                               | –                                                                  | –                                       | –          |
| District of Columbia        | –                               | –                                                                  | –                                       | –          | 5 (5–5)                         | 1.7 (1.6–1.8)                                                      | 114.9 (107.0–122.8)                     | 2          | –                               | –                                                                  | –                                       | –          |
| Florida                     | –                               | –                                                                  | –                                       | –          | 174 (164–185)                   | 1.3 (1.2–1.4)                                                      | 122.5 (114.9–130.3)                     | 22         | –                               | –                                                                  | –                                       | –          |
| Georgia                     | –                               | –                                                                  | –                                       | –          | 87 (82–92)                      | 1.7 (1.6–1.8)                                                      | 143.4 (135.1–151.9)                     | 3          | –                               | –                                                                  | –                                       | –          |
| Hawaii                      | –                               | –                                                                  | –                                       | –          | 10 (10–11)                      | 1.2 (1.1–1.2)                                                      | 138.5 (130.5–146.6)                     | 36         | –                               | –                                                                  | –                                       | –          |

| (eTable 4)<br>State, cancer | Both sexes                      |                                                                    |                                         |            | Men                             |                                                                    |                                         |            | Women                           |                                                                    |                                         |            |
|-----------------------------|---------------------------------|--------------------------------------------------------------------|-----------------------------------------|------------|---------------------------------|--------------------------------------------------------------------|-----------------------------------------|------------|---------------------------------|--------------------------------------------------------------------|-----------------------------------------|------------|
|                             | Total lost earnings, million \$ | Age-std. lost earning rate, million \$ per 10 <sup>5</sup> persons | Average lost earnings, \$1000 per death | State rank | Total lost earnings, million \$ | Age-std. lost earning rate, million \$ per 10 <sup>5</sup> persons | Average lost earnings, \$1000 per death | State rank | Total lost earnings, million \$ | Age-std. lost earning rate, million \$ per 10 <sup>5</sup> persons | Average lost earnings, \$1000 per death | State rank |
| Idaho                       | –                               | –                                                                  | –                                       | –          | 14 (13–16)                      | 1.5 (1.4–1.6)                                                      | 111.1 (102.6–119.4)                     | 6          | –                               | –                                                                  | –                                       | –          |
| Illinois                    | –                               | –                                                                  | –                                       | –          | 106 (101–112)                   | 1.5 (1.4–1.6)                                                      | 137.5 (129.9–145.2)                     | 7          | –                               | –                                                                  | –                                       | –          |
| Indiana                     | –                               | –                                                                  | –                                       | –          | 46 (44–49)                      | 1.2 (1.1–1.3)                                                      | 117.7 (111.5–124.6)                     | 27         | –                               | –                                                                  | –                                       | –          |
| Iowa                        | –                               | –                                                                  | –                                       | –          | 20 (19–21)                      | 1.1 (1.0–1.1)                                                      | 105.1 (98.9–111.9)                      | 43         | –                               | –                                                                  | –                                       | –          |
| Kansas                      | –                               | –                                                                  | –                                       | –          | 22 (20–23)                      | 1.3 (1.2–1.4)                                                      | 123.9 (114.7–133.0)                     | 18         | –                               | –                                                                  | –                                       | –          |
| Kentucky                    | –                               | –                                                                  | –                                       | –          | 29 (27–31)                      | 1.1 (1.0–1.2)                                                      | 105.3 (98.8–112.6)                      | 40         | –                               | –                                                                  | –                                       | –          |
| Louisiana                   | –                               | –                                                                  | –                                       | –          | 37 (35–39)                      | 1.4 (1.3–1.5)                                                      | 121.8 (115.4–128.6)                     | 13         | –                               | –                                                                  | –                                       | –          |
| Maine                       | –                               | –                                                                  | –                                       | –          | 12 (11–13)                      | 1.2 (1.1–1.3)                                                      | 110.0 (101.9–118.3)                     | 25         | –                               | –                                                                  | –                                       | –          |
| Maryland                    | –                               | –                                                                  | –                                       | –          | 49 (46–52)                      | 1.5 (1.4–1.6)                                                      | 127.3 (119.9–134.9)                     | 4          | –                               | –                                                                  | –                                       | –          |
| Massachusetts               | –                               | –                                                                  | –                                       | –          | 42 (39–45)                      | 1.1 (1.0–1.2)                                                      | 116.8 (108.0–125.8)                     | 39         | –                               | –                                                                  | –                                       | –          |
| Michigan                    | –                               | –                                                                  | –                                       | –          | 83 (79–89)                      | 1.3 (1.3–1.4)                                                      | 126.4 (119.4–134.1)                     | 17         | –                               | –                                                                  | –                                       | –          |

| (eTable 4)<br>State, cancer | Both sexes                      |                                                                    |                                         |            | Men                             |                                                                    |                                         |            | Women                           |                                                                    |                                         |            |
|-----------------------------|---------------------------------|--------------------------------------------------------------------|-----------------------------------------|------------|---------------------------------|--------------------------------------------------------------------|-----------------------------------------|------------|---------------------------------|--------------------------------------------------------------------|-----------------------------------------|------------|
|                             | Total lost earnings, million \$ | Age-std. lost earning rate, million \$ per 10 <sup>5</sup> persons | Average lost earnings, \$1000 per death | State rank | Total lost earnings, million \$ | Age-std. lost earning rate, million \$ per 10 <sup>5</sup> persons | Average lost earnings, \$1000 per death | State rank | Total lost earnings, million \$ | Age-std. lost earning rate, million \$ per 10 <sup>5</sup> persons | Average lost earnings, \$1000 per death | State rank |
| Minnesota                   | –                               | –                                                                  | –                                       | –          | 35 (33–38)                      | 1.1 (1.0–1.2)                                                      | 106.8 (99.4–114.4)                      | 37         | –                               | –                                                                  | –                                       | –          |
| Mississippi                 | –                               | –                                                                  | –                                       | –          | 25 (24–26)                      | 1.5 (1.4–1.6)                                                      | 115.1 (108.9–121.6)                     | 5          | –                               | –                                                                  | –                                       | –          |
| Missouri                    | –                               | –                                                                  | –                                       | –          | 46 (43–49)                      | 1.3 (1.2–1.3)                                                      | 133.6 (125.1–142.1)                     | 23         | –                               | –                                                                  | –                                       | –          |
| Montana                     | –                               | –                                                                  | –                                       | –          | 8 (7–9)                         | 1.2 (1.1–1.3)                                                      | 100.0 (92.7–107.6)                      | 30         | –                               | –                                                                  | –                                       | –          |
| Nebraska                    | –                               | –                                                                  | –                                       | –          | 9 (8–9)                         | 0.8 (0.8–0.9)                                                      | 92.5 (86.7–98.5)                        | 49         | –                               | –                                                                  | –                                       | –          |
| Nevada                      | –                               | –                                                                  | –                                       | –          | 18 (17–20)                      | 1.1 (1.0–1.2)                                                      | 112.5 (105.4–120.3)                     | 41         | –                               | –                                                                  | –                                       | –          |
| New Hampshire               | –                               | –                                                                  | –                                       | –          | 12 (11–13)                      | 1.3 (1.2–1.5)                                                      | 137.6 (126.9–148.9)                     | 19         | –                               | –                                                                  | –                                       | –          |
| New Jersey                  | –                               | –                                                                  | –                                       | –          | 54 (50–57)                      | 1.0 (1.0–1.1)                                                      | 112.0 (104.9–119.5)                     | 44         | –                               | –                                                                  | –                                       | –          |
| New Mexico                  | –                               | –                                                                  | –                                       | –          | 14 (13–16)                      | 1.2 (1.1–1.3)                                                      | 109.0 (100.3–118.1)                     | 28         | –                               | –                                                                  | –                                       | –          |
| New York                    | –                               | –                                                                  | –                                       | –          | 128 (120–135)                   | 1.2 (1.1–1.2)                                                      | 118.4 (111.9–125.8)                     | 35         | –                               | –                                                                  | –                                       | –          |
| North Carolina              | –                               | –                                                                  | –                                       | –          | 77 (72–81)                      | 1.3 (1.3–1.4)                                                      | 122.7 (115.8–130.3)                     | 16         | –                               | –                                                                  | –                                       | –          |



| (eTable 4)<br>State, cancer | Both sexes                      |                                                                    |                                         |            | Men                             |                                                                    |                                         |            | Women                           |                                                                    |                                         |            |
|-----------------------------|---------------------------------|--------------------------------------------------------------------|-----------------------------------------|------------|---------------------------------|--------------------------------------------------------------------|-----------------------------------------|------------|---------------------------------|--------------------------------------------------------------------|-----------------------------------------|------------|
|                             | Total lost earnings, million \$ | Age-std. lost earning rate, million \$ per 10 <sup>5</sup> persons | Average lost earnings, \$1000 per death | State rank | Total lost earnings, million \$ | Age-std. lost earning rate, million \$ per 10 <sup>5</sup> persons | Average lost earnings, \$1000 per death | State rank | Total lost earnings, million \$ | Age-std. lost earning rate, million \$ per 10 <sup>5</sup> persons | Average lost earnings, \$1000 per death | State rank |
| North Dakota                | –                               | –                                                                  | –                                       | –          | 4 (4–4)                         | 0.9 (0.9–1.0)                                                      | 94.4 (87.8–101.4)                       | 48         | –                               | –                                                                  | –                                       | –          |
| Ohio                        | –                               | –                                                                  | –                                       | –          | 80 (75–85)                      | 1.2 (1.1–1.2)                                                      | 108.4 (101.9–115.1)                     | 34         | –                               | –                                                                  | –                                       | –          |
| Oklahoma                    | –                               | –                                                                  | –                                       | –          | 32 (29–34)                      | 1.4 (1.3–1.5)                                                      | 122.1 (113.8–130.4)                     | 12         | –                               | –                                                                  | –                                       | –          |
| Oregon                      | –                               | –                                                                  | –                                       | –          | 38 (35–41)                      | 1.5 (1.4–1.6)                                                      | 127.1 (118.2–136.4)                     | 8          | –                               | –                                                                  | –                                       | –          |
| Pennsylvania                | –                               | –                                                                  | –                                       | –          | 96 (91–102)                     | 1.2 (1.1–1.3)                                                      | 114.3 (107.9–121.2)                     | 32         | –                               | –                                                                  | –                                       | –          |
| Rhode Island                | –                               | –                                                                  | –                                       | –          | 6 (6–7)                         | 1.0 (0.9–1.0)                                                      | 96.1 (90.8–101.9)                       | 47         | –                               | –                                                                  | –                                       | –          |
| South Carolina              | –                               | –                                                                  | –                                       | –          | 42 (39–44)                      | 1.4 (1.3–1.5)                                                      | 114.9 (108.0–122.4)                     | 14         | –                               | –                                                                  | –                                       | –          |
| South Dakota                | –                               | –                                                                  | –                                       | –          | 5 (5–6)                         | 1.1 (1.0–1.2)                                                      | 83.9 (76.3–91.7)                        | 42         | –                               | –                                                                  | –                                       | –          |
| Tennessee                   | –                               | –                                                                  | –                                       | –          | 52 (49–55)                      | 1.3 (1.3–1.4)                                                      | 119.7 (112.9–127.2)                     | 15         | –                               | –                                                                  | –                                       | –          |
| Texas                       | –                               | –                                                                  | –                                       | –          | 178 (168–189)                   | 1.3 (1.2–1.4)                                                      | 138.1 (130.1–146.4)                     | 20         | –                               | –                                                                  | –                                       | –          |
| Utah                        | –                               | –                                                                  | –                                       | –          | 15 (14–16)                      | 1.2 (1.1–1.3)                                                      | 127.2 (118.8–136.4)                     | 31         | –                               | –                                                                  | –                                       | –          |

| (eTable 4)<br>State, cancer | Both sexes                      |                                                                    |                                         |            | Men                             |                                                                    |                                         |            | Women                           |                                                                    |                                         |            |
|-----------------------------|---------------------------------|--------------------------------------------------------------------|-----------------------------------------|------------|---------------------------------|--------------------------------------------------------------------|-----------------------------------------|------------|---------------------------------|--------------------------------------------------------------------|-----------------------------------------|------------|
|                             | Total lost earnings, million \$ | Age-std. lost earning rate, million \$ per 10 <sup>5</sup> persons | Average lost earnings, \$1000 per death | State rank | Total lost earnings, million \$ | Age-std. lost earning rate, million \$ per 10 <sup>5</sup> persons | Average lost earnings, \$1000 per death | State rank | Total lost earnings, million \$ | Age-std. lost earning rate, million \$ per 10 <sup>5</sup> persons | Average lost earnings, \$1000 per death | State rank |
| Vermont                     | –                               | –                                                                  | –                                       | –          | 5 (4–5)                         | 1.2 (1.1–1.3)                                                      | 131.3 (121.4–141.8)                     | 29         | –                               | –                                                                  | –                                       | –          |
| Virginia                    | –                               | –                                                                  | –                                       | –          | 57 (53–61)                      | 1.2 (1.1–1.3)                                                      | 121.4 (112.6–130.5)                     | 24         | –                               | –                                                                  | –                                       | –          |
| Washington                  | –                               | –                                                                  | –                                       | –          | 57 (53–61)                      | 1.5 (1.4–1.6)                                                      | 130.6 (121.7–139.6)                     | 9          | –                               | –                                                                  | –                                       | –          |
| West Virginia               | –                               | –                                                                  | –                                       | –          | 10 (9–11)                       | 0.8 (0.7–0.8)                                                      | 93.2 (86.2–100.3)                       | 51         | –                               | –                                                                  | –                                       | –          |
| Wisconsin                   | –                               | –                                                                  | –                                       | –          | 39 (37–41)                      | 1.1 (1.1–1.2)                                                      | 108.4 (102.3–114.9)                     | 38         | –                               | –                                                                  | –                                       | –          |
| Wyoming                     | –                               | –                                                                  | –                                       | –          | 3 (3–3)                         | 0.8 (0.7–0.9)                                                      | 94.6 (87.4–101.6)                       | 50         | –                               | –                                                                  | –                                       | –          |
| <b>United States</b>        | –                               | –                                                                  | –                                       | –          | <b>2,378 (2,228–2,531)</b>      | <b>1.3 (1.2–1.4)</b>                                               | <b>123.6 (115.9–131.6)</b>              | –          | –                               | –                                                                  | –                                       | –          |
| <b>Pancreas</b>             |                                 |                                                                    |                                         |            |                                 |                                                                    |                                         |            |                                 |                                                                    |                                         |            |
| Alabama                     | 116 (113–120)                   | 2.0 (2.0–2.1)                                                      | 193.5 (187.7–199.6)                     | 4          | 79 (75–82)                      | 2.8 (2.7–2.9)                                                      | 244.5 (234.1–254.6)                     | 10         | 38 (37–39)                      | 1.3 (1.3–1.4)                                                      | 134.7 (130.6–139.3)                     | 1          |
| Alaska                      | 12 (11–12)                      | 1.3 (1.3–1.4)                                                      | 187.1 (180.4–194.6)                     | 46         | 8 (7–8)                         | 1.8 (1.7–1.9)                                                      | 266.2 (253.9–278.8)                     | 47         | 4 (4–4)                         | 0.9 (0.8–1.0)                                                      | 117.7 (111.3–125.0)                     | 19         |
| Arizona                     | 130 (125–134)                   | 1.6 (1.6–1.7)                                                      | 174.1 (167.9–180.6)                     | 19         | 99 (94–103)                     | 2.6 (2.5–2.7)                                                      | 234.3 (223.9–245.0)                     | 18         | 31 (30–32)                      | 0.8 (0.7–0.8)                                                      | 95.6 (91.5–100.2)                       | 33         |

| (eTable 4)<br>State, cancer | Both sexes                      |                                                                    |                                         |            | Men                             |                                                                    |                                         |            | Women                           |                                                                    |                                         |            |
|-----------------------------|---------------------------------|--------------------------------------------------------------------|-----------------------------------------|------------|---------------------------------|--------------------------------------------------------------------|-----------------------------------------|------------|---------------------------------|--------------------------------------------------------------------|-----------------------------------------|------------|
|                             | Total lost earnings, million \$ | Age-std. lost earning rate, million \$ per 10 <sup>5</sup> persons | Average lost earnings, \$1000 per death | State rank | Total lost earnings, million \$ | Age-std. lost earning rate, million \$ per 10 <sup>5</sup> persons | Average lost earnings, \$1000 per death | State rank | Total lost earnings, million \$ | Age-std. lost earning rate, million \$ per 10 <sup>5</sup> persons | Average lost earnings, \$1000 per death | State rank |
| Arkansas                    | 54 (52–55)                      | 1.6 (1.6–1.6)                                                      | 164.7 (159.9–169.4)                     | 25         | 42 (41–44)                      | 2.7 (2.6–2.7)                                                      | 228.2 (220.1–236.1)                     | 16         | 11 (11–12)                      | 0.6 (0.6–0.6)                                                      | 79.6 (76.4–83.1)                        | 45         |
| California                  | 632 (609–656)                   | 1.4 (1.4–1.5)                                                      | 180.7 (174.2–187.6)                     | 41         | 457 (435–480)                   | 2.2 (2.1–2.3)                                                      | 245.4 (233.9–257.7)                     | 37         | 175 (168–184)                   | 0.8 (0.7–0.8)                                                      | 107.1 (102.5–112.2)                     | 32         |
| Colorado                    | 89 (85–93)                      | 1.4 (1.3–1.5)                                                      | 197.9 (189.5–207.0)                     | 44         | 65 (61–69)                      | 2.0 (1.9–2.2)                                                      | 252.0 (237.4–267.3)                     | 42         | 24 (23–25)                      | 0.8 (0.8–0.8)                                                      | 125.2 (120.2–131.1)                     | 28         |
| Connecticut                 | 64 (62–67)                      | 1.4 (1.4–1.5)                                                      | 163.6 (158.1–169.5)                     | 43         | 46 (44–48)                      | 2.1 (2.0–2.2)                                                      | 226.4 (216.4–236.4)                     | 41         | 19 (18–20)                      | 0.8 (0.8–0.9)                                                      | 97.0 (92.6–102.1)                       | 25         |
| Delaware                    | 18 (18–19)                      | 1.7 (1.6–1.7)                                                      | 146.6 (141.4–152.1)                     | 18         | 12 (11–12)                      | 2.0 (1.9–2.1)                                                      | 182.4 (173.7–191.4)                     | 43         | 7 (6–7)                         | 1.1 (1.1–1.2)                                                      | 108.3 (103.6–113.7)                     | 7          |
| District of Columbia        | 16 (15–17)                      | 2.2 (2.1–2.3)                                                      | 203.3 (195.4–211.9)                     | 1          | 12 (12–13)                      | 3.8 (3.6–4.0)                                                      | 283.1 (269.2–297.5)                     | 1          | 3 (3–4)                         | 0.9 (0.9–0.9)                                                      | 100.1 (95.6–105.0)                      | 20         |
| Florida                     | 387 (373–401)                   | 1.5 (1.4–1.5)                                                      | 150.9 (145.5–156.4)                     | 38         | 280 (267–294)                   | 2.2 (2.1–2.3)                                                      | 198.1 (188.9–207.7)                     | 36         | 107 (103–111)                   | 0.8 (0.8–0.8)                                                      | 92.7 (89.1–96.8)                        | 27         |
| Georgia                     | 170 (164–175)                   | 1.5 (1.4–1.5)                                                      | 168.3 (163.1–174.1)                     | 40         | 118 (112–123)                   | 2.1 (2.0–2.2)                                                      | 217.1 (207.4–226.9)                     | 38         | 52 (50–54)                      | 0.9 (0.8–0.9)                                                      | 111.4 (107.5–115.7)                     | 22         |
| Hawaii                      | 31 (30–32)                      | 1.8 (1.8–1.9)                                                      | 185.8 (179.4–192.2)                     | 9          | 21 (20–22)                      | 2.4 (2.3–2.5)                                                      | 240.9 (230.0–251.9)                     | 25         | 10 (10–11)                      | 1.2 (1.2–1.3)                                                      | 127.3 (121.8–133.7)                     | 2          |
| Idaho                       | 30 (29–31)                      | 1.6 (1.5–1.7)                                                      | 161.1 (155.1–167.3)                     | 24         | 25 (24–26)                      | 2.7 (2.6–2.8)                                                      | 207.7 (198.5–217.3)                     | 15         | 5 (5–6)                         | 0.5 (0.5–0.6)                                                      | 79.2 (75.3–83.2)                        | 46         |
| Illinois                    | 233 (226–241)                   | 1.5 (1.5–1.6)                                                      | 170.7 (165.3–176.4)                     | 30         | 171 (163–178)                   | 2.4 (2.3–2.5)                                                      | 225.6 (216.0–234.9)                     | 28         | 62 (60–65)                      | 0.8 (0.8–0.8)                                                      | 102.3 (98.5–106.4)                      | 30         |

| (eTable 4)<br>State, cancer | Both sexes                      |                                                                    |                                         |            | Men                             |                                                                    |                                         |            | Women                           |                                                                    |                                         |            |
|-----------------------------|---------------------------------|--------------------------------------------------------------------|-----------------------------------------|------------|---------------------------------|--------------------------------------------------------------------|-----------------------------------------|------------|---------------------------------|--------------------------------------------------------------------|-----------------------------------------|------------|
|                             | Total lost earnings, million \$ | Age-std. lost earning rate, million \$ per 10 <sup>5</sup> persons | Average lost earnings, \$1000 per death | State rank | Total lost earnings, million \$ | Age-std. lost earning rate, million \$ per 10 <sup>5</sup> persons | Average lost earnings, \$1000 per death | State rank | Total lost earnings, million \$ | Age-std. lost earning rate, million \$ per 10 <sup>5</sup> persons | Average lost earnings, \$1000 per death | State rank |
| Indiana                     | 133 (130–137)                   | 1.7 (1.7–1.8)                                                      | 181.3 (176.4–186.5)                     | 15         | 100 (97–104)                    | 2.7 (2.6–2.8)                                                      | 246.5 (237.8–255.1)                     | 13         | 33 (32–34)                      | 0.8 (0.8–0.8)                                                      | 100.9 (97.2–104.8)                      | 24         |
| Iowa                        | 59 (58–61)                      | 1.6 (1.6–1.7)                                                      | 165.0 (160.0–170.3)                     | 20         | 46 (44–48)                      | 2.6 (2.5–2.7)                                                      | 234.2 (225.4–243.4)                     | 17         | 13 (13–14)                      | 0.7 (0.7–0.7)                                                      | 81.3 (78.0–84.8)                        | 39         |
| Kansas                      | 63 (61–65)                      | 2.0 (1.9–2.1)                                                      | 183.7 (177.6–190.1)                     | 5          | 48 (46–50)                      | 3.1 (3.0–3.2)                                                      | 261.5 (250.6–272.3)                     | 6          | 15 (14–15)                      | 0.9 (0.9–1.0)                                                      | 93.7 (89.9–98.1)                        | 12         |
| Kentucky                    | 85 (82–87)                      | 1.5 (1.5–1.6)                                                      | 162.6 (157.6–167.8)                     | 32         | 58 (55–60)                      | 2.1 (2.0–2.2)                                                      | 214.8 (205.3–224.6)                     | 39         | 27 (26–28)                      | 1.0 (1.0–1.0)                                                      | 106.9 (103.4–110.6)                     | 9          |
| Louisiana                   | 104 (101–106)                   | 1.9 (1.9–2.0)                                                      | 173.7 (169.1–178.5)                     | 7          | 71 (68–73)                      | 2.8 (2.7–2.9)                                                      | 222.4 (214.2–230.9)                     | 11         | 33 (32–34)                      | 1.2 (1.2–1.2)                                                      | 118.2 (114.5–122.1)                     | 3          |
| Maine                       | 27 (26–28)                      | 1.4 (1.4–1.5)                                                      | 132.2 (127.1–137.4)                     | 42         | 18 (17–19)                      | 1.9 (1.8–2.0)                                                      | 173.9 (165.1–183.4)                     | 46         | 9 (9–10)                        | 1.0 (0.9–1.0)                                                      | 90.4 (86.6–94.5)                        | 10         |
| Maryland                    | 123 (119–127)                   | 1.7 (1.7–1.8)                                                      | 183.4 (177.5–189.8)                     | 16         | 87 (84–91)                      | 2.6 (2.5–2.7)                                                      | 254.8 (243.9–266.0)                     | 19         | 36 (34–37)                      | 1.0 (0.9–1.0)                                                      | 108.6 (104.4–113.5)                     | 11         |
| Massachusetts               | 133 (128–139)                   | 1.6 (1.5–1.7)                                                      | 173.3 (167.0–180.3)                     | 23         | 94 (90–99)                      | 2.4 (2.2–2.5)                                                      | 244.8 (233.5–256.8)                     | 29         | 39 (37–42)                      | 0.9 (0.9–1.0)                                                      | 102.0 (96.7–108.1)                      | 15         |
| Michigan                    | 197 (191–203)                   | 1.6 (1.5–1.6)                                                      | 152.7 (148.0–157.6)                     | 26         | 144 (138–150)                   | 2.4 (2.3–2.5)                                                      | 211.1 (202.6–219.8)                     | 27         | 53 (51–55)                      | 0.8 (0.8–0.8)                                                      | 87.0 (83.6–90.6)                        | 26         |
| Minnesota                   | 104 (101–108)                   | 1.6 (1.6–1.7)                                                      | 173.1 (167.8–178.4)                     | 22         | 80 (77–83)                      | 2.5 (2.4–2.6)                                                      | 247.5 (238.0–256.8)                     | 21         | 24 (23–25)                      | 0.8 (0.7–0.8)                                                      | 86.6 (83.1–90.4)                        | 34         |
| Mississippi                 | 71 (69–73)                      | 2.2 (2.1–2.2)                                                      | 176.7 (171.8–181.7)                     | 3          | 53 (51–55)                      | 3.4 (3.3–3.5)                                                      | 236.8 (228.0–245.6)                     | 2          | 18 (17–18)                      | 1.1 (1.0–1.1)                                                      | 100.4 (97.3–103.6)                      | 8          |

| (eTable 4)<br>State, cancer | Both sexes                      |                                                                    |                                         |            | Men                             |                                                                    |                                         |            | Women                           |                                                                    |                                         |            |
|-----------------------------|---------------------------------|--------------------------------------------------------------------|-----------------------------------------|------------|---------------------------------|--------------------------------------------------------------------|-----------------------------------------|------------|---------------------------------|--------------------------------------------------------------------|-----------------------------------------|------------|
|                             | Total lost earnings, million \$ | Age-std. lost earning rate, million \$ per 10 <sup>5</sup> persons | Average lost earnings, \$1000 per death | State rank | Total lost earnings, million \$ | Age-std. lost earning rate, million \$ per 10 <sup>5</sup> persons | Average lost earnings, \$1000 per death | State rank | Total lost earnings, million \$ | Age-std. lost earning rate, million \$ per 10 <sup>5</sup> persons | Average lost earnings, \$1000 per death | State rank |
| Missouri                    | 120 (116–123)                   | 1.6 (1.6–1.7)                                                      | 170.4 (165.3–175.7)                     | 21         | 88 (85–92)                      | 2.5 (2.4–2.5)                                                      | 227.8 (218.9–237.2)                     | 23         | 32 (31–33)                      | 0.9 (0.8–0.9)                                                      | 100.1 (97.0–103.5)                      | 23         |
| Montana                     | 15 (14–16)                      | 1.0 (1.0–1.0)                                                      | 123.2 (118.3–128.4)                     | 50         | 10 (10–11)                      | 1.3 (1.3–1.4)                                                      | 155.8 (147.9–164.7)                     | 51         | 5 (4–5)                         | 0.7 (0.6–0.7)                                                      | 84.1 (79.6–88.9)                        | 42         |
| Nebraska                    | 31 (30–32)                      | 1.5 (1.5–1.6)                                                      | 180.5 (174.8–186.6)                     | 34         | 20 (19–21)                      | 1.9 (1.9–2.0)                                                      | 221.5 (211.4–231.6)                     | 45         | 10 (10–11)                      | 1.1 (1.1–1.2)                                                      | 132.7 (128.8–137.1)                     | 4          |
| Nevada                      | 53 (52–55)                      | 1.6 (1.5–1.6)                                                      | 171.9 (166.6–177.5)                     | 27         | 41 (39–42)                      | 2.4 (2.3–2.5)                                                      | 220.3 (211.6–229.6)                     | 26         | 13 (12–13)                      | 0.7 (0.7–0.8)                                                      | 101.5 (97.4–105.9)                      | 37         |
| New Hampshire               | 28 (28–29)                      | 1.8 (1.7–1.8)                                                      | 184.4 (178.6–190.6)                     | 13         | 24 (23–25)                      | 3.1 (3.0–3.2)                                                      | 261.4 (251.6–271.3)                     | 5          | 4 (4–4)                         | 0.5 (0.4–0.5)                                                      | 67.1 (63.8–70.6)                        | 49         |
| New Jersey                  | 162 (157–167)                   | 1.5 (1.4–1.5)                                                      | 159.8 (154.6–165.3)                     | 39         | 117 (112–122)                   | 2.2 (2.1–2.3)                                                      | 226.3 (216.7–235.9)                     | 33         | 45 (43–47)                      | 0.8 (0.8–0.8)                                                      | 90.7 (87.2–94.6)                        | 31         |
| New Mexico                  | 31 (30–32)                      | 1.1 (1.1–1.2)                                                      | 137.8 (132.4–143.6)                     | 48         | 23 (21–24)                      | 1.7 (1.6–1.8)                                                      | 186.0 (176.6–195.4)                     | 49         | 8 (8–9)                         | 0.6 (0.6–0.7)                                                      | 81.7 (77.5–86.7)                        | 43         |
| New York                    | 351 (339–365)                   | 1.5 (1.4–1.5)                                                      | 171.0 (165.1–177.6)                     | 37         | 261 (250–274)                   | 2.4 (2.2–2.5)                                                      | 239.3 (228.8–250.6)                     | 30         | 90 (85–95)                      | 0.7 (0.7–0.7)                                                      | 93.3 (88.9–98.5)                        | 40         |
| North Carolina              | 197 (191–203)                   | 1.7 (1.6–1.7)                                                      | 171.9 (166.8–177.1)                     | 17         | 140 (134–145)                   | 2.5 (2.4–2.6)                                                      | 223.8 (215.0–232.8)                     | 20         | 57 (55–59)                      | 0.9 (0.9–0.9)                                                      | 109.3 (105.3–113.6)                     | 17         |
| North Dakota                | 16 (15–16)                      | 1.9 (1.9–2.0)                                                      | 202.4 (196.9–208.0)                     | 6          | 11 (11–12)                      | 2.7 (2.6–2.8)                                                      | 257.9 (248.4–267.8)                     | 12         | 5 (5–5)                         | 1.1 (1.1–1.2)                                                      | 134.1 (129.6–139.4)                     | 5          |
| Ohio                        | 217 (210–223)                   | 1.5 (1.5–1.6)                                                      | 145.8 (141.6–150.4)                     | 33         | 152 (146–158)                   | 2.2 (2.1–2.3)                                                      | 198.9 (190.9–207.2)                     | 34         | 65 (63–67)                      | 0.9 (0.9–0.9)                                                      | 89.7 (86.6–93.1)                        | 18         |

| (eTable 4)<br>State, cancer | Both sexes                      |                                                                    |                                         |            | Men                             |                                                                    |                                         |            | Women                           |                                                                    |                                         |            |
|-----------------------------|---------------------------------|--------------------------------------------------------------------|-----------------------------------------|------------|---------------------------------|--------------------------------------------------------------------|-----------------------------------------|------------|---------------------------------|--------------------------------------------------------------------|-----------------------------------------|------------|
|                             | Total lost earnings, million \$ | Age-std. lost earning rate, million \$ per 10 <sup>5</sup> persons | Average lost earnings, \$1000 per death | State rank | Total lost earnings, million \$ | Age-std. lost earning rate, million \$ per 10 <sup>5</sup> persons | Average lost earnings, \$1000 per death | State rank | Total lost earnings, million \$ | Age-std. lost earning rate, million \$ per 10 <sup>5</sup> persons | Average lost earnings, \$1000 per death | State rank |
| Oklahoma                    | 68 (66–71)                      | 1.5 (1.5–1.6)                                                      | 158.6 (153.8–163.8)                     | 36         | 50 (48–52)                      | 2.3 (2.2–2.4)                                                      | 213.6 (205.1–222.2)                     | 31         | 18 (17–19)                      | 0.7 (0.7–0.8)                                                      | 92.6 (88.7–96.9)                        | 35         |
| Oregon                      | 94 (90–97)                      | 1.9 (1.9–2.0)                                                      | 174.2 (168.1–181.1)                     | 8          | 70 (67–73)                      | 3.0 (2.9–3.2)                                                      | 232.9 (222.2–244.1)                     | 7          | 23 (22–25)                      | 0.9 (0.8–0.9)                                                      | 99.5 (95.0–104.8)                       | 21         |
| Pennsylvania                | 287 (278–296)                   | 1.8 (1.7–1.8)                                                      | 163.6 (158.4–168.8)                     | 10         | 219 (210–227)                   | 2.9 (2.7–3.0)                                                      | 231.4 (222.1–240.4)                     | 9          | 68 (65–71)                      | 0.8 (0.8–0.8)                                                      | 84.2 (80.9–87.8)                        | 29         |
| Rhode Island                | 11 (11–12)                      | 0.9 (0.9–1.0)                                                      | 116.7 (112.4–121.6)                     | 51         | 8 (7–8)                         | 1.4 (1.4–1.5)                                                      | 176.8 (168.8–185.5)                     | 50         | 3 (3–4)                         | 0.5 (0.4–0.5)                                                      | 64.7 (59.7–70.4)                        | 48         |
| South Carolina              | 104 (101–107)                   | 1.8 (1.7–1.8)                                                      | 174.7 (169.7–179.9)                     | 12         | 75 (73–78)                      | 2.7 (2.6–2.8)                                                      | 233.6 (224.8–242.6)                     | 14         | 28 (27–29)                      | 0.9 (0.9–1.0)                                                      | 104.3 (100.6–108.3)                     | 14         |
| South Dakota                | 15 (15–16)                      | 1.5 (1.5–1.6)                                                      | 172.9 (165.9–179.9)                     | 35         | 12 (11–13)                      | 2.4 (2.3–2.6)                                                      | 247.9 (235.6–260.5)                     | 24         | 3 (3–3)                         | 0.6 (0.6–0.6)                                                      | 82.8 (79.6–86.2)                        | 44         |
| Tennessee                   | 140 (136–144)                   | 1.8 (1.7–1.8)                                                      | 181.2 (175.9–186.9)                     | 11         | 110 (106–115)                   | 2.9 (2.8–3.0)                                                      | 241.6 (232.6–250.6)                     | 8          | 30 (29–31)                      | 0.7 (0.7–0.8)                                                      | 93.8 (90.4–97.6)                        | 36         |
| Texas                       | 401 (388–414)                   | 1.4 (1.3–1.4)                                                      | 175.1 (169.6–180.9)                     | 45         | 293 (281–305)                   | 2.1 (2.0–2.2)                                                      | 235.0 (225.2–244.4)                     | 40         | 108 (104–112)                   | 0.7 (0.7–0.7)                                                      | 103.4 (99.8–107.4)                      | 38         |
| Utah                        | 30 (29–32)                      | 1.1 (1.0–1.1)                                                      | 163.0 (155.6–170.9)                     | 49         | 24 (23–26)                      | 1.8 (1.7–1.9)                                                      | 234.0 (220.8–247.5)                     | 48         | 6 (6–7)                         | 0.4 (0.4–0.5)                                                      | 74.1 (70.1–78.6)                        | 50         |
| Vermont                     | 15 (14–16)                      | 1.7 (1.6–1.9)                                                      | 198.2 (185.3–212.2)                     | 14         | 13 (12–14)                      | 3.2 (3.0–3.5)                                                      | 291.4 (269.5–314.3)                     | 4          | 2 (2–2)                         | 0.4 (0.3–0.4)                                                      | 63.0 (59.2–66.9)                        | 51         |
| Virginia                    | 150 (145–156)                   | 1.5 (1.5–1.6)                                                      | 170.4 (164.9–176.4)                     | 31         | 102 (98–107)                    | 2.2 (2.1–2.3)                                                      | 220.7 (210.6–230.6)                     | 35         | 48 (46–50)                      | 0.9 (0.9–1.0)                                                      | 114.8 (110.5–119.4)                     | 13         |

| (eTable 4)<br>State, cancer | Both sexes                      |                                                                    |                                         |            | Men                             |                                                                    |                                         |            | Women                           |                                                                    |                                         |            |
|-----------------------------|---------------------------------|--------------------------------------------------------------------|-----------------------------------------|------------|---------------------------------|--------------------------------------------------------------------|-----------------------------------------|------------|---------------------------------|--------------------------------------------------------------------|-----------------------------------------|------------|
|                             | Total lost earnings, million \$ | Age-std. lost earning rate, million \$ per 10 <sup>5</sup> persons | Average lost earnings, \$1000 per death | State rank | Total lost earnings, million \$ | Age-std. lost earning rate, million \$ per 10 <sup>5</sup> persons | Average lost earnings, \$1000 per death | State rank | Total lost earnings, million \$ | Age-std. lost earning rate, million \$ per 10 <sup>5</sup> persons | Average lost earnings, \$1000 per death | State rank |
| Washington                  | 134 (129–139)                   | 1.6 (1.5–1.6)                                                      | 180.4 (173.9–187.3)                     | 29         | 96 (92–101)                     | 2.2 (2.1–2.4)                                                      | 221.7 (211.3–232.6)                     | 32         | 38 (36–39)                      | 0.9 (0.9–0.9)                                                      | 122.3 (117.5–127.7)                     | 16         |
| West Virginia               | 48 (47–49)                      | 2.2 (2.1–2.2)                                                      | 186.4 (181.1–191.6)                     | 2          | 35 (34–36)                      | 3.3 (3.2–3.3)                                                      | 264.0 (254.6–273.5)                     | 3          | 13 (12–13)                      | 1.1 (1.1–1.2)                                                      | 103.0 (99.9–106.5)                      | 6          |
| Wisconsin                   | 113 (110–117)                   | 1.6 (1.5–1.6)                                                      | 164.0 (159.2–169.1)                     | 28         | 87 (84–90)                      | 2.5 (2.4–2.6)                                                      | 231.8 (223.3–240.5)                     | 22         | 26 (25–27)                      | 0.7 (0.6–0.7)                                                      | 83.0 (79.6–86.8)                        | 41         |
| Wyoming                     | 9 (9–9)                         | 1.3 (1.2–1.3)                                                      | 155.6 (149.1–162.4)                     | 47         | 7 (7–8)                         | 2.0 (1.9–2.1)                                                      | 204.2 (194.1–214.9)                     | 44         | 2 (2–2)                         | 0.5 (0.5–0.5)                                                      | 78.1 (73.5–83.4)                        | 47         |
| <b>United States</b>        | <b>5,920 (5,731–6,123)</b>      | <b>1.6 (1.5–1.6)</b>                                               | <b>169.3 (163.9–175.1)</b>              | –          | <b>4,322 (4,136–4,503)</b>      | <b>2.4 (2.3–2.5)</b>                                               | <b>228.6 (218.7–238.2)</b>              | –          | <b>1,597 (1,536–1,667)</b>      | <b>0.8 (0.8–0.9)</b>                                               | <b>99.5 (95.6–103.8)</b>                | –          |
| <b>Ovary</b>                |                                 |                                                                    |                                         |            |                                 |                                                                    |                                         |            |                                 |                                                                    |                                         |            |
| Alabama                     | –                               | –                                                                  | –                                       | –          | –                               | –                                                                  | –                                       | –          | 20 (19–20)                      | 0.7 (0.7–0.7)                                                      | 107.1 (103.6–110.7)                     | 47         |
| Alaska                      | –                               | –                                                                  | –                                       | –          | –                               | –                                                                  | –                                       | –          | 4 (4–4)                         | 0.9 (0.9–1.0)                                                      | 175.7 (168.1–184.3)                     | 25         |
| Arizona                     | –                               | –                                                                  | –                                       | –          | –                               | –                                                                  | –                                       | –          | 36 (35–38)                      | 0.9 (0.9–0.9)                                                      | 133.8 (128.8–139.5)                     | 27         |
| Arkansas                    | –                               | –                                                                  | –                                       | –          | –                               | –                                                                  | –                                       | –          | 15 (15–16)                      | 1.0 (1.0–1.0)                                                      | 118.6 (115.3–122.4)                     | 14         |
| California                  | –                               | –                                                                  | –                                       | –          | –                               | –                                                                  | –                                       | –          | 230 (223–238)                   | 1.1 (1.0–1.1)                                                      | 170.3 (165.1–176.1)                     | 9          |

| (eTable 4)<br>State, cancer | Both sexes                      |                                                                    |                                         |            | Men                             |                                                                    |                                         |            | Women                           |                                                                    |                                         |            |
|-----------------------------|---------------------------------|--------------------------------------------------------------------|-----------------------------------------|------------|---------------------------------|--------------------------------------------------------------------|-----------------------------------------|------------|---------------------------------|--------------------------------------------------------------------|-----------------------------------------|------------|
|                             | Total lost earnings, million \$ | Age-std. lost earning rate, million \$ per 10 <sup>5</sup> persons | Average lost earnings, \$1000 per death | State rank | Total lost earnings, million \$ | Age-std. lost earning rate, million \$ per 10 <sup>5</sup> persons | Average lost earnings, \$1000 per death | State rank | Total lost earnings, million \$ | Age-std. lost earning rate, million \$ per 10 <sup>5</sup> persons | Average lost earnings, \$1000 per death | State rank |
| Colorado                    | –                               | –                                                                  | –                                       | –          | –                               | –                                                                  | –                                       | –          | 36 (35–37)                      | 1.2 (1.2–1.2)                                                      | 180.0 (174.1–186.5)                     | 6          |
| Connecticut                 | –                               | –                                                                  | –                                       | –          | –                               | –                                                                  | –                                       | –          | 20 (20–21)                      | 0.9 (0.9–1.0)                                                      | 142.1 (137.4–147.7)                     | 21         |
| Delaware                    | –                               | –                                                                  | –                                       | –          | –                               | –                                                                  | –                                       | –          | 6 (6–6)                         | 1.1 (1.1–1.2)                                                      | 111.2 (108.1–114.8)                     | 8          |
| District of Columbia        | –                               | –                                                                  | –                                       | –          | –                               | –                                                                  | –                                       | –          | 6 (6–6)                         | 2.0 (1.9–2.1)                                                      | 203.2 (194.8–212.5)                     | 1          |
| Florida                     | –                               | –                                                                  | –                                       | –          | –                               | –                                                                  | –                                       | –          | 99 (95–103)                     | 0.8 (0.8–0.8)                                                      | 125.6 (121.4–130.5)                     | 38         |
| Georgia                     | –                               | –                                                                  | –                                       | –          | –                               | –                                                                  | –                                       | –          | 54 (53–56)                      | 0.9 (0.9–1.0)                                                      | 147.9 (143.1–153.3)                     | 24         |
| Hawaii                      | –                               | –                                                                  | –                                       | –          | –                               | –                                                                  | –                                       | –          | 4 (4–4)                         | 0.5 (0.5–0.6)                                                      | 122.5 (117.6–127.6)                     | 48         |
| Idaho                       | –                               | –                                                                  | –                                       | –          | –                               | –                                                                  | –                                       | –          | 8 (7–8)                         | 0.8 (0.8–0.8)                                                      | 110.5 (106.1–115.3)                     | 41         |
| Illinois                    | –                               | –                                                                  | –                                       | –          | –                               | –                                                                  | –                                       | –          | 62 (60–65)                      | 0.8 (0.8–0.8)                                                      | 133.1 (128.4–138.4)                     | 35         |
| Indiana                     | –                               | –                                                                  | –                                       | –          | –                               | –                                                                  | –                                       | –          | 32 (31–33)                      | 0.9 (0.9–0.9)                                                      | 134.3 (130.5–138.5)                     | 31         |
| Iowa                        | –                               | –                                                                  | –                                       | –          | –                               | –                                                                  | –                                       | –          | 15 (14–15)                      | 0.8 (0.8–0.8)                                                      | 117.1 (112.7–122.1)                     | 40         |



| (eTable 4)<br>State, cancer | Both sexes                      |                                                                    |                                         |            | Men                             |                                                                    |                                         |            | Women                           |                                                                    |                                         |            |
|-----------------------------|---------------------------------|--------------------------------------------------------------------|-----------------------------------------|------------|---------------------------------|--------------------------------------------------------------------|-----------------------------------------|------------|---------------------------------|--------------------------------------------------------------------|-----------------------------------------|------------|
|                             | Total lost earnings, million \$ | Age-std. lost earning rate, million \$ per 10 <sup>5</sup> persons | Average lost earnings, \$1000 per death | State rank | Total lost earnings, million \$ | Age-std. lost earning rate, million \$ per 10 <sup>5</sup> persons | Average lost earnings, \$1000 per death | State rank | Total lost earnings, million \$ | Age-std. lost earning rate, million \$ per 10 <sup>5</sup> persons | Average lost earnings, \$1000 per death | State rank |
| Kansas                      | –                               | –                                                                  | –                                       | –          | –                               | –                                                                  | –                                       | –          | 16 (16–17)                      | 1.0 (1.0–1.0)                                                      | 154.2 (148.8–159.8)                     | 15         |
| Kentucky                    | –                               | –                                                                  | –                                       | –          | –                               | –                                                                  | –                                       | –          | 20 (19–20)                      | 0.8 (0.7–0.8)                                                      | 111.3 (107.8–114.9)                     | 42         |
| Louisiana                   | –                               | –                                                                  | –                                       | –          | –                               | –                                                                  | –                                       | –          | 19 (19–20)                      | 0.7 (0.7–0.8)                                                      | 131.8 (127.9–135.9)                     | 43         |
| Maine                       | –                               | –                                                                  | –                                       | –          | –                               | –                                                                  | –                                       | –          | 8 (8–8)                         | 0.9 (0.9–1.0)                                                      | 130.9 (126.1–136.2)                     | 22         |
| Maryland                    | –                               | –                                                                  | –                                       | –          | –                               | –                                                                  | –                                       | –          | 34 (33–35)                      | 0.9 (0.9–1.0)                                                      | 156.6 (151.1–162.7)                     | 19         |
| Massachusetts               | –                               | –                                                                  | –                                       | –          | –                               | –                                                                  | –                                       | –          | 49 (47–52)                      | 1.2 (1.1–1.2)                                                      | 177.9 (169.1–187.6)                     | 7          |
| Michigan                    | –                               | –                                                                  | –                                       | –          | –                               | –                                                                  | –                                       | –          | 56 (55–58)                      | 1.0 (0.9–1.0)                                                      | 132.8 (128.9–137.1)                     | 17         |
| Minnesota                   | –                               | –                                                                  | –                                       | –          | –                               | –                                                                  | –                                       | –          | 26 (26–27)                      | 0.9 (0.8–0.9)                                                      | 143.3 (139.0–148.1)                     | 32         |
| Mississippi                 | –                               | –                                                                  | –                                       | –          | –                               | –                                                                  | –                                       | –          | 12 (12–12)                      | 0.7 (0.7–0.7)                                                      | 122.8 (118.8–126.9)                     | 45         |
| Missouri                    | –                               | –                                                                  | –                                       | –          | –                               | –                                                                  | –                                       | –          | 31 (30–32)                      | 1.0 (0.9–1.0)                                                      | 147.3 (143.2–151.6)                     | 18         |
| Montana                     | –                               | –                                                                  | –                                       | –          | –                               | –                                                                  | –                                       | –          | 6 (5–6)                         | 0.9 (0.9–0.9)                                                      | 122.3 (117.0–128.4)                     | 29         |

| (eTable 4)<br>State, cancer | Both sexes                      |                                                                    |                                         |            | Men                             |                                                                    |                                         |            | Women                           |                                                                    |                                         |            |
|-----------------------------|---------------------------------|--------------------------------------------------------------------|-----------------------------------------|------------|---------------------------------|--------------------------------------------------------------------|-----------------------------------------|------------|---------------------------------|--------------------------------------------------------------------|-----------------------------------------|------------|
|                             | Total lost earnings, million \$ | Age-std. lost earning rate, million \$ per 10 <sup>5</sup> persons | Average lost earnings, \$1000 per death | State rank | Total lost earnings, million \$ | Age-std. lost earning rate, million \$ per 10 <sup>5</sup> persons | Average lost earnings, \$1000 per death | State rank | Total lost earnings, million \$ | Age-std. lost earning rate, million \$ per 10 <sup>5</sup> persons | Average lost earnings, \$1000 per death | State rank |
| Nebraska                    | –                               | –                                                                  | –                                       | –          | –                               | –                                                                  | –                                       | –          | 10 (9–10)                       | 0.9 (0.9–1.0)                                                      | 138.9 (134.1–144.5)                     | 23         |
| Nevada                      | –                               | –                                                                  | –                                       | –          | –                               | –                                                                  | –                                       | –          | 13 (12–13)                      | 0.8 (0.8–0.8)                                                      | 125.7 (121.9–129.8)                     | 36         |
| New Hampshire               | –                               | –                                                                  | –                                       | –          | –                               | –                                                                  | –                                       | –          | 11 (10–11)                      | 1.5 (1.5–1.5)                                                      | 197.9 (193.3–202.9)                     | 2          |
| New Jersey                  | –                               | –                                                                  | –                                       | –          | –                               | –                                                                  | –                                       | –          | 49 (47–51)                      | 0.9 (0.9–0.9)                                                      | 141.0 (136.0–146.6)                     | 30         |
| New Mexico                  | –                               | –                                                                  | –                                       | –          | –                               | –                                                                  | –                                       | –          | 18 (17–18)                      | 1.5 (1.4–1.5)                                                      | 174.2 (168.1–180.9)                     | 3          |
| New York                    | –                               | –                                                                  | –                                       | –          | –                               | –                                                                  | –                                       | –          | 122 (117–127)                   | 1.0 (1.0–1.1)                                                      | 153.6 (147.6–160.6)                     | 10         |
| North Carolina              | –                               | –                                                                  | –                                       | –          | –                               | –                                                                  | –                                       | –          | 43 (42–45)                      | 0.7 (0.7–0.7)                                                      | 127.1 (122.5–132.4)                     | 44         |
| North Dakota                | –                               | –                                                                  | –                                       | –          | –                               | –                                                                  | –                                       | –          | 2 (1–2)                         | 0.3 (0.3–0.3)                                                      | 48.4 (45.8–51.2)                        | 51         |
| Ohio                        | –                               | –                                                                  | –                                       | –          | –                               | –                                                                  | –                                       | –          | 58 (56–60)                      | 0.9 (0.8–0.9)                                                      | 128.7 (124.5–133.2)                     | 33         |
| Oklahoma                    | –                               | –                                                                  | –                                       | –          | –                               | –                                                                  | –                                       | –          | 19 (19–20)                      | 0.9 (0.9–0.9)                                                      | 145.3 (140.9–150.4)                     | 28         |
| Oregon                      | –                               | –                                                                  | –                                       | –          | –                               | –                                                                  | –                                       | –          | 30 (29–32)                      | 1.3 (1.3–1.4)                                                      | 157.4 (151.6–164.1)                     | 4          |

| (eTable 4)<br>State, cancer | Both sexes                      |                                                                    |                                         |            | Men                             |                                                                    |                                         |            | Women                           |                                                                    |                                         |            |
|-----------------------------|---------------------------------|--------------------------------------------------------------------|-----------------------------------------|------------|---------------------------------|--------------------------------------------------------------------|-----------------------------------------|------------|---------------------------------|--------------------------------------------------------------------|-----------------------------------------|------------|
|                             | Total lost earnings, million \$ | Age-std. lost earning rate, million \$ per 10 <sup>5</sup> persons | Average lost earnings, \$1000 per death | State rank | Total lost earnings, million \$ | Age-std. lost earning rate, million \$ per 10 <sup>5</sup> persons | Average lost earnings, \$1000 per death | State rank | Total lost earnings, million \$ | Age-std. lost earning rate, million \$ per 10 <sup>5</sup> persons | Average lost earnings, \$1000 per death | State rank |
| Pennsylvania                | –                               | –                                                                  | –                                       | –          | –                               | –                                                                  | –                                       | –          | 77 (75–80)                      | 1.0 (1.0–1.0)                                                      | 141.8 (137.1–146.8)                     | 13         |
| Rhode Island                | –                               | –                                                                  | –                                       | –          | –                               | –                                                                  | –                                       | –          | 4 (4–4)                         | 0.5 (0.5–0.5)                                                      | 102.2 (98.1–106.3)                      | 49         |
| South Carolina              | –                               | –                                                                  | –                                       | –          | –                               | –                                                                  | –                                       | –          | 22 (22–23)                      | 0.8 (0.8–0.8)                                                      | 123.3 (119.7–127.2)                     | 37         |
| South Dakota                | –                               | –                                                                  | –                                       | –          | –                               | –                                                                  | –                                       | –          | 2 (2–2)                         | 0.4 (0.4–0.4)                                                      | 81.2 (78.3–84.1)                        | 50         |
| Tennessee                   | –                               | –                                                                  | –                                       | –          | –                               | –                                                                  | –                                       | –          | 36 (35–37)                      | 1.0 (1.0–1.0)                                                      | 128.7 (124.8–132.9)                     | 16         |
| Texas                       | –                               | –                                                                  | –                                       | –          | –                               | –                                                                  | –                                       | –          | 114 (111–117)                   | 0.8 (0.8–0.8)                                                      | 150.8 (146.5–155.3)                     | 39         |
| Utah                        | –                               | –                                                                  | –                                       | –          | –                               | –                                                                  | –                                       | –          | 13 (12–13)                      | 0.9 (0.9–1.0)                                                      | 141.0 (135.9–146.6)                     | 20         |
| Vermont                     | –                               | –                                                                  | –                                       | –          | –                               | –                                                                  | –                                       | –          | 3 (3–3)                         | 1.0 (1.0–1.0)                                                      | 116.9 (112.8–120.9)                     | 12         |
| Virginia                    | –                               | –                                                                  | –                                       | –          | –                               | –                                                                  | –                                       | –          | 41 (40–43)                      | 0.8 (0.8–0.9)                                                      | 138.0 (132.9–144.0)                     | 34         |
| Washington                  | –                               | –                                                                  | –                                       | –          | –                               | –                                                                  | –                                       | –          | 50 (49–52)                      | 1.2 (1.2–1.3)                                                      | 160.3 (155.0–166.5)                     | 5          |
| West Virginia               | –                               | –                                                                  | –                                       | –          | –                               | –                                                                  | –                                       | –          | 10 (10–11)                      | 0.9 (0.9–0.9)                                                      | 118.0 (114.4–121.6)                     | 26         |

| (eTable 4)<br>State, cancer          | Both sexes                      |                                                                    |                                         |            | Men                             |                                                                    |                                         |            | Women                           |                                                                    |                                         |            |
|--------------------------------------|---------------------------------|--------------------------------------------------------------------|-----------------------------------------|------------|---------------------------------|--------------------------------------------------------------------|-----------------------------------------|------------|---------------------------------|--------------------------------------------------------------------|-----------------------------------------|------------|
|                                      | Total lost earnings, million \$ | Age-std. lost earning rate, million \$ per 10 <sup>5</sup> persons | Average lost earnings, \$1000 per death | State rank | Total lost earnings, million \$ | Age-std. lost earning rate, million \$ per 10 <sup>5</sup> persons | Average lost earnings, \$1000 per death | State rank | Total lost earnings, million \$ | Age-std. lost earning rate, million \$ per 10 <sup>5</sup> persons | Average lost earnings, \$1000 per death | State rank |
| Wisconsin                            | –                               | –                                                                  | –                                       | –          | –                               | –                                                                  | –                                       | –          | 36 (35–38)                      | 1.0 (1.0–1.0)                                                      | 154.4 (149.4–160.1)                     | 11         |
| Wyoming                              | –                               | –                                                                  | –                                       | –          | –                               | –                                                                  | –                                       | –          | 2 (2–2)                         | 0.7 (0.6–0.7)                                                      | 111.4 (106.3–117.1)                     | 46         |
| <b>United States</b>                 | –                               | –                                                                  | –                                       | –          | –                               | –                                                                  | –                                       | –          | <b>1,711 (1,655–1,773)</b>      | <b>0.9 (0.9–1.0)</b>                                               | <b>143.4 (138.8–148.6)</b>              | –          |
| <b>Liver, intrahepatic bile duct</b> |                                 |                                                                    |                                         |            |                                 |                                                                    |                                         |            |                                 |                                                                    |                                         |            |
| Alabama                              | 76 (74–79)                      | 1.3 (1.2–1.3)                                                      | 190.0 (184.4–196.3)                     | 17         | 64 (61–66)                      | 2.2 (2.1–2.3)                                                      | 223.1 (215.0–232.1)                     | 13         | 12 (12–13)                      | 0.4 (0.4–0.4)                                                      | 107.6 (104.3–111.0)                     | 22         |
| Alaska                               | 9 (9–10)                        | 1.1 (1.1–1.1)                                                      | 291.8 (285.2–299.2)                     | 27         | 8 (7–8)                         | 1.7 (1.7–1.8)                                                      | 331.5 (322.4–341.8)                     | 35         | ^                               | ^                                                                  | ^                                       | 9          |
| Arizona                              | 97 (94–100)                     | 1.3 (1.2–1.3)                                                      | 192.7 (186.9–198.9)                     | 18         | 81 (78–84)                      | 2.2 (2.1–2.2)                                                      | 238.7 (230.3–247.8)                     | 14         | 16 (15–17)                      | 0.4 (0.4–0.4)                                                      | 97.3 (93.6–101.7)                       | 24         |
| Arkansas                             | 47 (46–49)                      | 1.3 (1.3–1.4)                                                      | 201.3 (195.6–207.5)                     | 12         | 37 (36–39)                      | 2.1 (2.0–2.2)                                                      | 228.3 (220.3–237.3)                     | 19         | 10 (10–11)                      | 0.6 (0.6–0.7)                                                      | 140.7 (137.1–144.5)                     | 2          |
| California                           | 595 (578–614)                   | 1.3 (1.3–1.4)                                                      | 200.9 (194.9–207.3)                     | 11         | 496 (478–514)                   | 2.3 (2.2–2.4)                                                      | 244.8 (235.9–253.9)                     | 11         | 100 (96–103)                    | 0.5 (0.4–0.5)                                                      | 106.1 (102.6–109.7)                     | 10         |
| Colorado                             | 74 (72–76)                      | 1.1 (1.1–1.2)                                                      | 233.8 (226.8–241.1)                     | 26         | 62 (59–64)                      | 1.9 (1.9–2.0)                                                      | 280.1 (269.9–290.4)                     | 25         | 12 (12–13)                      | 0.3 (0.3–0.4)                                                      | 127.3 (122.2–132.9)                     | 34         |
| Connecticut                          | 51 (49–53)                      | 1.1 (1.1–1.1)                                                      | 200.9 (194.3–207.6)                     | 28         | 42 (40–43)                      | 1.8 (1.7–1.9)                                                      | 234.9 (225.2–244.8)                     | 34         | 9 (9–10)                        | 0.5 (0.4–0.5)                                                      | 122.5 (118.4–127.0)                     | 13         |

| (eTable 4)<br>State, cancer | Both sexes                      |                                                                    |                                         |            | Men                             |                                                                    |                                         |            | Women                           |                                                                    |                                         |            |
|-----------------------------|---------------------------------|--------------------------------------------------------------------|-----------------------------------------|------------|---------------------------------|--------------------------------------------------------------------|-----------------------------------------|------------|---------------------------------|--------------------------------------------------------------------|-----------------------------------------|------------|
|                             | Total lost earnings, million \$ | Age-std. lost earning rate, million \$ per 10 <sup>5</sup> persons | Average lost earnings, \$1000 per death | State rank | Total lost earnings, million \$ | Age-std. lost earning rate, million \$ per 10 <sup>5</sup> persons | Average lost earnings, \$1000 per death | State rank | Total lost earnings, million \$ | Age-std. lost earning rate, million \$ per 10 <sup>5</sup> persons | Average lost earnings, \$1000 per death | State rank |
| Delaware                    | 13 (13–14)                      | 1.1 (1.1–1.1)                                                      | 194.9 (188.4–201.1)                     | 32         | 11 (11–12)                      | 1.9 (1.8–2.0)                                                      | 236.0 (227.0–245.4)                     | 26         | 2 (2–2)                         | 0.4 (0.3–0.4)                                                      | 106.5 (101.8–111.3)                     | 32         |
| District of Columbia        | 10 (9–10)                       | 1.4 (1.3–1.4)                                                      | 180.8 (173.5–188.6)                     | 10         | 9 (8–9)                         | 2.7 (2.5–2.8)                                                      | 252.7 (241.3–264.1)                     | 6          | 1 (1–1)                         | 0.2 (0.2–0.3)                                                      | 48.5 (45.8–51.2)                        | 43         |
| Florida                     | 327 (317–338)                   | 1.3 (1.2–1.3)                                                      | 191.3 (185.4–197.9)                     | 19         | 268 (258–279)                   | 2.1 (2.0–2.2)                                                      | 223.1 (214.5–232.1)                     | 17         | 59 (57–61)                      | 0.5 (0.5–0.5)                                                      | 116.0 (112.2–120.1)                     | 6          |
| Georgia                     | 126 (122–130)                   | 1.1 (1.0–1.1)                                                      | 197.1 (191.4–203.4)                     | 35         | 106 (102–110)                   | 1.9 (1.8–1.9)                                                      | 234.5 (226.1–243.6)                     | 30         | 20 (19–21)                      | 0.3 (0.3–0.3)                                                      | 107.2 (103.2–111.6)                     | 38         |
| Hawaii                      | 25 (24–26)                      | 1.5 (1.4–1.5)                                                      | 191.5 (185.3–197.7)                     | 6          | 21 (20–22)                      | 2.5 (2.4–2.6)                                                      | 236.3 (227.7–245.5)                     | 9          | 3 (3–4)                         | 0.4 (0.4–0.4)                                                      | 87.8 (83.8–92.1)                        | 18         |
| Idaho                       | 20 (19–21)                      | 1.1 (1.0–1.1)                                                      | 181.8 (175.6–188.1)                     | 34         | 15 (15–16)                      | 1.5 (1.5–1.6)                                                      | 205.6 (196.5–214.8)                     | 44         | 5 (5–5)                         | 0.6 (0.6–0.6)                                                      | 133.9 (129.6–138.5)                     | 3          |
| Illinois                    | 161 (156–166)                   | 1.0 (1.0–1.1)                                                      | 184.7 (179.4–190.6)                     | 36         | 126 (122–131)                   | 1.7 (1.6–1.7)                                                      | 223.7 (215.5–232.4)                     | 37         | 35 (34–36)                      | 0.5 (0.5–0.5)                                                      | 113.2 (109.5–117.1)                     | 7          |
| Indiana                     | 78 (75–80)                      | 1.0 (0.9–1.0)                                                      | 188.8 (183.1–194.9)                     | 39         | 66 (64–68)                      | 1.7 (1.6–1.7)                                                      | 232.2 (224.0–241.1)                     | 36         | 12 (11–12)                      | 0.3 (0.3–0.3)                                                      | 91.6 (88.2–95.2)                        | 40         |
| Iowa                        | 34 (33–35)                      | 0.9 (0.8–0.9)                                                      | 170.9 (165.3–177.0)                     | 47         | 31 (30–32)                      | 1.6 (1.5–1.6)                                                      | 224.3 (216.0–233.0)                     | 41         | 3 (3–3)                         | 0.2 (0.1–0.2)                                                      | 49.3 (46.9–51.7)                        | 50         |
| Kansas                      | 33 (32–34)                      | 0.9 (0.9–1.0)                                                      | 191.9 (185.7–198.3)                     | 40         | 27 (26–28)                      | 1.6 (1.5–1.6)                                                      | 228.0 (219.1–237.1)                     | 42         | 6 (5–6)                         | 0.3 (0.3–0.4)                                                      | 108.3 (104.4–112.4)                     | 33         |
| Kentucky                    | 77 (75–79)                      | 1.4 (1.4–1.5)                                                      | 207.5 (201.6–214.0)                     | 8          | 61 (59–64)                      | 2.3 (2.2–2.4)                                                      | 236.5 (228.1–245.9)                     | 10         | 16 (15–16)                      | 0.6 (0.6–0.7)                                                      | 139.7 (136.0–143.7)                     | 1          |

| (eTable 4)<br>State, cancer | Both sexes                      |                                                                    |                                         |            | Men                             |                                                                    |                                         |            | Women                           |                                                                    |                                         |            |
|-----------------------------|---------------------------------|--------------------------------------------------------------------|-----------------------------------------|------------|---------------------------------|--------------------------------------------------------------------|-----------------------------------------|------------|---------------------------------|--------------------------------------------------------------------|-----------------------------------------|------------|
|                             | Total lost earnings, million \$ | Age-std. lost earning rate, million \$ per 10 <sup>5</sup> persons | Average lost earnings, \$1000 per death | State rank | Total lost earnings, million \$ | Age-std. lost earning rate, million \$ per 10 <sup>5</sup> persons | Average lost earnings, \$1000 per death | State rank | Total lost earnings, million \$ | Age-std. lost earning rate, million \$ per 10 <sup>5</sup> persons | Average lost earnings, \$1000 per death | State rank |
| Louisiana                   | 94 (91–98)                      | 1.6 (1.6–1.7)                                                      | 209.9 (203.0–217.1)                     | 2          | 84 (80–87)                      | 2.9 (2.8–3.0)                                                      | 244.3 (235.3–253.9)                     | 4          | 11 (10–11)                      | 0.4 (0.4–0.4)                                                      | 100.7 (97.2–104.1)                      | 25         |
| Maine                       | 15 (15–16)                      | 0.8 (0.8–0.8)                                                      | 160.6 (154.4–167.2)                     | 49         | 13 (13–14)                      | 1.5 (1.4–1.5)                                                      | 203.0 (193.9–212.3)                     | 47         | 2 (2–2)                         | 0.2 (0.2–0.2)                                                      | 63.9 (59.8–68.6)                        | 49         |
| Maryland                    | 77 (75–80)                      | 1.0 (1.0–1.0)                                                      | 187.2 (180.7–193.9)                     | 37         | 68 (66–71)                      | 1.9 (1.8–2.0)                                                      | 229.4 (220.6–238.7)                     | 28         | 9 (9–9)                         | 0.2 (0.2–0.2)                                                      | 77.8 (74.8–81.0)                        | 46         |
| Massachusetts               | 82 (79–84)                      | 1.0 (0.9–1.0)                                                      | 183.6 (177.3–190.2)                     | 38         | 65 (62–68)                      | 1.6 (1.5–1.7)                                                      | 203.1 (194.4–212.3)                     | 40         | 16 (16–17)                      | 0.4 (0.4–0.4)                                                      | 132.3 (128.1–137.1)                     | 19         |
| Michigan                    | 115 (111–118)                   | 0.9 (0.9–1.0)                                                      | 179.4 (174.1–185.3)                     | 42         | 91 (87–95)                      | 1.5 (1.5–1.6)                                                      | 212.4 (204.3–220.9)                     | 45         | 24 (23–25)                      | 0.4 (0.4–0.4)                                                      | 112.5 (108.9–116.3)                     | 28         |
| Minnesota                   | 71 (69–73)                      | 1.1 (1.1–1.1)                                                      | 218.8 (212.6–225.4)                     | 29         | 60 (58–62)                      | 1.9 (1.8–1.9)                                                      | 258.5 (249.8–268.0)                     | 29         | 11 (11–11)                      | 0.3 (0.3–0.3)                                                      | 118.3 (114.4–122.6)                     | 35         |
| Mississippi                 | 55 (54–57)                      | 1.6 (1.6–1.6)                                                      | 215.4 (209.1–222.1)                     | 3          | 48 (47–50)                      | 2.9 (2.9–3.0)                                                      | 261.6 (252.4–271.0)                     | 3          | 7 (7–7)                         | 0.4 (0.4–0.4)                                                      | 96.6 (93.3–99.9)                        | 27         |
| Missouri                    | 84 (81–87)                      | 1.1 (1.1–1.1)                                                      | 195.9 (190.0–202.4)                     | 31         | 70 (67–72)                      | 1.8 (1.8–1.9)                                                      | 228.1 (219.6–237.1)                     | 33         | 14 (14–15)                      | 0.4 (0.4–0.4)                                                      | 116.9 (113.1–120.9)                     | 23         |
| Montana                     | 18 (18–19)                      | 1.5 (1.5–1.5)                                                      | 241.8 (235.1–248.9)                     | 4          | 16 (16–17)                      | 2.7 (2.7–2.8)                                                      | 302.6 (292.9–312.5)                     | 5          | 2 (2–2)                         | 0.2 (0.2–0.3)                                                      | 85.4 (81.9–89.4)                        | 44         |
| Nebraska                    | 19 (19–20)                      | 0.9 (0.9–1.0)                                                      | 224.6 (218.2–231.1)                     | 41         | 16 (16–17)                      | 1.6 (1.6–1.7)                                                      | 287.6 (278.0–297.6)                     | 38         | 3 (3–3)                         | 0.2 (0.2–0.3)                                                      | 102.6 (98.3–107.4)                      | 45         |
| Nevada                      | 41 (40–42)                      | 1.2 (1.1–1.2)                                                      | 201.2 (194.9–208.1)                     | 23         | 34 (33–35)                      | 2.0 (1.9–2.0)                                                      | 241.5 (232.1–251.1)                     | 24         | 7 (7–7)                         | 0.4 (0.4–0.4)                                                      | 110.8 (106.6–115.6)                     | 21         |

| (eTable 4)<br>State, cancer | Both sexes                      |                                                                    |                                         |            | Men                             |                                                                    |                                         |            | Women                           |                                                                    |                                         |            |
|-----------------------------|---------------------------------|--------------------------------------------------------------------|-----------------------------------------|------------|---------------------------------|--------------------------------------------------------------------|-----------------------------------------|------------|---------------------------------|--------------------------------------------------------------------|-----------------------------------------|------------|
|                             | Total lost earnings, million \$ | Age-std. lost earning rate, million \$ per 10 <sup>5</sup> persons | Average lost earnings, \$1000 per death | State rank | Total lost earnings, million \$ | Age-std. lost earning rate, million \$ per 10 <sup>5</sup> persons | Average lost earnings, \$1000 per death | State rank | Total lost earnings, million \$ | Age-std. lost earning rate, million \$ per 10 <sup>5</sup> persons | Average lost earnings, \$1000 per death | State rank |
| New Hampshire               | 19 (18–20)                      | 1.1 (1.1–1.2)                                                      | 212.9 (206.3–219.2)                     | 25         | 15 (15–16)                      | 1.9 (1.8–1.9)                                                      | 253.0 (243.8–262.3)                     | 31         | 4 (3–4)                         | 0.4 (0.4–0.4)                                                      | 125.1 (121.0–129.6)                     | 17         |
| New Jersey                  | 101 (98–105)                    | 0.9 (0.9–0.9)                                                      | 186.7 (180.5–193.2)                     | 44         | 87 (83–90)                      | 1.6 (1.5–1.7)                                                      | 231.3 (222.2–240.6)                     | 39         | 15 (14–15)                      | 0.2 (0.2–0.3)                                                      | 87.9 (84.5–91.6)                        | 42         |
| New Mexico                  | 43 (42–45)                      | 1.7 (1.7–1.8)                                                      | 221.6 (215.1–228.7)                     | 1          | 39 (38–40)                      | 3.3 (3.2–3.4)                                                      | 260.7 (252.1–269.7)                     | 1          | 4 (4–5)                         | 0.3 (0.3–0.3)                                                      | 94.5 (91.4–98.1)                        | 37         |
| New York                    | 254 (246–262)                   | 1.1 (1.1–1.1)                                                      | 198.1 (192.2–204.3)                     | 30         | 211 (203–219)                   | 1.9 (1.8–2.0)                                                      | 236.4 (228.1–245.2)                     | 27         | 43 (42–45)                      | 0.4 (0.4–0.4)                                                      | 110.6 (107.1–114.6)                     | 29         |
| North Carolina              | 155 (150–160)                   | 1.3 (1.2–1.3)                                                      | 200.5 (194.8–206.9)                     | 16         | 124 (119–129)                   | 2.1 (2.0–2.2)                                                      | 231.3 (222.8–240.1)                     | 16         | 31 (30–32)                      | 0.5 (0.5–0.5)                                                      | 130.4 (126.3–134.8)                     | 5          |
| North Dakota                | 6 (6–6)                         | 0.6 (0.6–0.7)                                                      | 182.3 (176.9–188.2)                     | 51         | 5 (5–5)                         | 1.1 (1.0–1.1)                                                      | 252.0 (243.6–260.8)                     | 51         | ^                               | ^                                                                  | ^                                       | 47         |
| Ohio                        | 163 (158–168)                   | 1.2 (1.1–1.2)                                                      | 197.6 (191.9–203.9)                     | 24         | 137 (133–143)                   | 2.0 (2.0–2.1)                                                      | 237.0 (228.8–245.9)                     | 21         | 25 (24–26)                      | 0.4 (0.4–0.4)                                                      | 103.8 (100.8–106.9)                     | 30         |
| Oklahoma                    | 66 (64–69)                      | 1.5 (1.4–1.5)                                                      | 211.5 (205.3–218.2)                     | 5          | 57 (55–59)                      | 2.6 (2.5–2.7)                                                      | 257.0 (248.1–266.8)                     | 7          | 10 (9–10)                       | 0.4 (0.4–0.4)                                                      | 103.3 (100.0–106.7)                     | 26         |
| Oregon                      | 68 (65–70)                      | 1.3 (1.2–1.3)                                                      | 200.3 (194.0–207.3)                     | 15         | 56 (54–58)                      | 2.1 (2.1–2.2)                                                      | 228.5 (219.9–237.9)                     | 15         | 12 (11–12)                      | 0.5 (0.5–0.5)                                                      | 126.6 (122.5–130.9)                     | 8          |
| Pennsylvania                | 177 (172–183)                   | 1.1 (1.0–1.1)                                                      | 187.1 (181.4–193.4)                     | 33         | 150 (145–156)                   | 1.8 (1.8–1.9)                                                      | 222.9 (214.9–231.8)                     | 32         | 27 (26–28)                      | 0.3 (0.3–0.3)                                                      | 98.3 (95.1–101.6)                       | 36         |
| Rhode Island                | 11 (11–12)                      | 0.9 (0.9–0.9)                                                      | 207.9 (200.6–215.6)                     | 45         | 9 (9–10)                        | 1.5 (1.5–1.6)                                                      | 225.2 (215.9–235.3)                     | 43         | 2 (2–2)                         | 0.3 (0.3–0.3)                                                      | 147.1 (142.5–151.8)                     | 39         |

| (eTable 4)<br>State, cancer | Both sexes                      |                                                                    |                                         |            | Men                             |                                                                    |                                         |            | Women                           |                                                                    |                                         |            |
|-----------------------------|---------------------------------|--------------------------------------------------------------------|-----------------------------------------|------------|---------------------------------|--------------------------------------------------------------------|-----------------------------------------|------------|---------------------------------|--------------------------------------------------------------------|-----------------------------------------|------------|
|                             | Total lost earnings, million \$ | Age-std. lost earning rate, million \$ per 10 <sup>5</sup> persons | Average lost earnings, \$1000 per death | State rank | Total lost earnings, million \$ | Age-std. lost earning rate, million \$ per 10 <sup>5</sup> persons | Average lost earnings, \$1000 per death | State rank | Total lost earnings, million \$ | Age-std. lost earning rate, million \$ per 10 <sup>5</sup> persons | Average lost earnings, \$1000 per death | State rank |
| South Carolina              | 75 (73–77)                      | 1.2 (1.2–1.2)                                                      | 203.9 (197.7–210.6)                     | 21         | 63 (60–65)                      | 2.1 (2.0–2.2)                                                      | 237.9 (229.1–247.1)                     | 20         | 12 (12–12)                      | 0.4 (0.4–0.4)                                                      | 116.9 (113.4–120.9)                     | 20         |
| South Dakota                | 14 (13–14)                      | 1.4 (1.4–1.4)                                                      | 284.5 (277.8–291.1)                     | 9          | 13 (12–13)                      | 3.0 (2.9–3.1)                                                      | 353.8 (344.8–362.4)                     | 2          | ^                               | ^                                                                  | ^                                       | 48         |
| Tennessee                   | 108 (105–112)                   | 1.3 (1.3–1.4)                                                      | 200.7 (194.4–207.7)                     | 13         | 90 (87–94)                      | 2.2 (2.2–2.3)                                                      | 229.6 (220.9–239.1)                     | 12         | 18 (17–18)                      | 0.5 (0.4–0.5)                                                      | 122.8 (119.2–126.7)                     | 11         |
| Texas                       | 434 (421–447)                   | 1.5 (1.4–1.5)                                                      | 210.7 (204.5–217.4)                     | 7          | 366 (353–380)                   | 2.5 (2.4–2.6)                                                      | 252.8 (243.9–262.3)                     | 8          | 68 (65–70)                      | 0.5 (0.4–0.5)                                                      | 110.7 (107.3–114.2)                     | 12         |
| Utah                        | 26 (25–27)                      | 0.9 (0.9–1.0)                                                      | 253.5 (245.4–261.5)                     | 43         | 19 (19–20)                      | 1.4 (1.3–1.5)                                                      | 278.5 (266.7–289.6)                     | 48         | 6 (6–7)                         | 0.5 (0.4–0.5)                                                      | 198.7 (194.1–203.3)                     | 14         |
| Vermont                     | 8 (7–8)                         | 0.8 (0.8–0.8)                                                      | 165.2 (158.9–172.1)                     | 48         | 6 (6–7)                         | 1.3 (1.2–1.4)                                                      | 207.5 (198.2–217.9)                     | 49         | 1 (1–1)                         | 0.4 (0.3–0.4)                                                      | 85.9 (81.6–90.4)                        | 31         |
| Virginia                    | 120 (117–124)                   | 1.2 (1.1–1.2)                                                      | 215.1 (209.0–221.6)                     | 22         | 99 (95–102)                     | 2.0 (1.9–2.1)                                                      | 254.3 (245.7–263.5)                     | 22         | 22 (21–22)                      | 0.4 (0.4–0.4)                                                      | 126.5 (122.6–130.8)                     | 16         |
| Washington                  | 115 (111–118)                   | 1.3 (1.3–1.3)                                                      | 209.0 (202.6–215.8)                     | 14         | 93 (90–97)                      | 2.1 (2.0–2.2)                                                      | 238.8 (229.8–248.2)                     | 18         | 21 (21–22)                      | 0.5 (0.5–0.5)                                                      | 135.3 (130.6–140.4)                     | 4          |
| West Virginia               | 31 (30–32)                      | 1.2 (1.2–1.2)                                                      | 197.1 (191.0–203.6)                     | 20         | 25 (24–26)                      | 2.0 (1.9–2.0)                                                      | 243.8 (234.4–253.6)                     | 23         | 6 (5–6)                         | 0.4 (0.4–0.5)                                                      | 105.4 (101.7–109.2)                     | 15         |
| Wisconsin                   | 61 (59–64)                      | 0.9 (0.8–0.9)                                                      | 176.9 (171.1–183.2)                     | 46         | 52 (50–54)                      | 1.5 (1.4–1.5)                                                      | 212.5 (203.9–221.1)                     | 46         | 10 (9–10)                       | 0.3 (0.3–0.3)                                                      | 92.9 (89.4–96.4)                        | 41         |
| Wyoming                     | 6 (5–6)                         | 0.7 (0.6–0.7)                                                      | 171.4 (162.8–180.6)                     | 50         | 5 (5–6)                         | 1.2 (1.2–1.3)                                                      | 182.5 (172.6–193.2)                     | 50         | ^                               | ^                                                                  | ^                                       | 51         |



| (eTable 4)<br>State, cancer | Both sexes                      |                                                                    |                                         |            | Men                             |                                                                    |                                         |            | Women                           |                                                                    |                                         |            |
|-----------------------------|---------------------------------|--------------------------------------------------------------------|-----------------------------------------|------------|---------------------------------|--------------------------------------------------------------------|-----------------------------------------|------------|---------------------------------|--------------------------------------------------------------------|-----------------------------------------|------------|
|                             | Total lost earnings, million \$ | Age-std. lost earning rate, million \$ per 10 <sup>5</sup> persons | Average lost earnings, \$1000 per death | State rank | Total lost earnings, million \$ | Age-std. lost earning rate, million \$ per 10 <sup>5</sup> persons | Average lost earnings, \$1000 per death | State rank | Total lost earnings, million \$ | Age-std. lost earning rate, million \$ per 10 <sup>5</sup> persons | Average lost earnings, \$1000 per death | State rank |
| <i>United States</i>        | <b>4,585</b><br>(4,449–4,733)   | <b>1.2</b> (1.2–1.2)                                               | <b>198.9</b><br>(193.0–205.4)           | –          | <b>3,818</b><br>(3,684–3,962)   | <b>2.0</b> (2.0–2.1)                                               | <b>236.9</b><br>(228.6–245.9)           | –          | <b>766</b> (741–791)            | <b>0.4</b> (0.4–0.4)                                               | <b>110.5</b><br>(106.9–114.2)           | –          |

Age-std., age-standardized.

Age-standardized lost earning rates are age-adjusted to the 2000 U.S. Standard Population. States are ordered alphabetically. In the 'National-level results' section, crude rates by age group for all cancers combined are age-specific rates. Other crude rates are for the entire U.S. population, including ages <16 and >84 years. Head and neck cancers include cancers of the lip, oral cavity, pharynx, nose, nasal cavity, middle ear, and larynx. In the 'State-level results' section, total lost earnings for the United States were calculated by summing up corresponding numbers for all 50 states and the District of Columbia; using these numbers, age-standardized lost earning rates and average lost earnings per death for the United States were calculated. Average lost earnings per death by age group were calculated by dividing total PYLL and lost earnings, respectively, by the number of cancer deaths in each sex and age group. Because lost earnings overall and by sex were from separate simulation models and due to rounding, lost earnings in men and women may not add up to totals.

^ Statistic not displayed due to fewer than 16 deaths.

**eFigure 1. Potentially Avoidable PYLL and Lost Earnings in Ages 16-84 Years in Both Sexes Combined by State if Age-Specific PYLL or Lost Earning Rates for All Cancers Combined in All States Were Similar to Those in Utah, 2015**

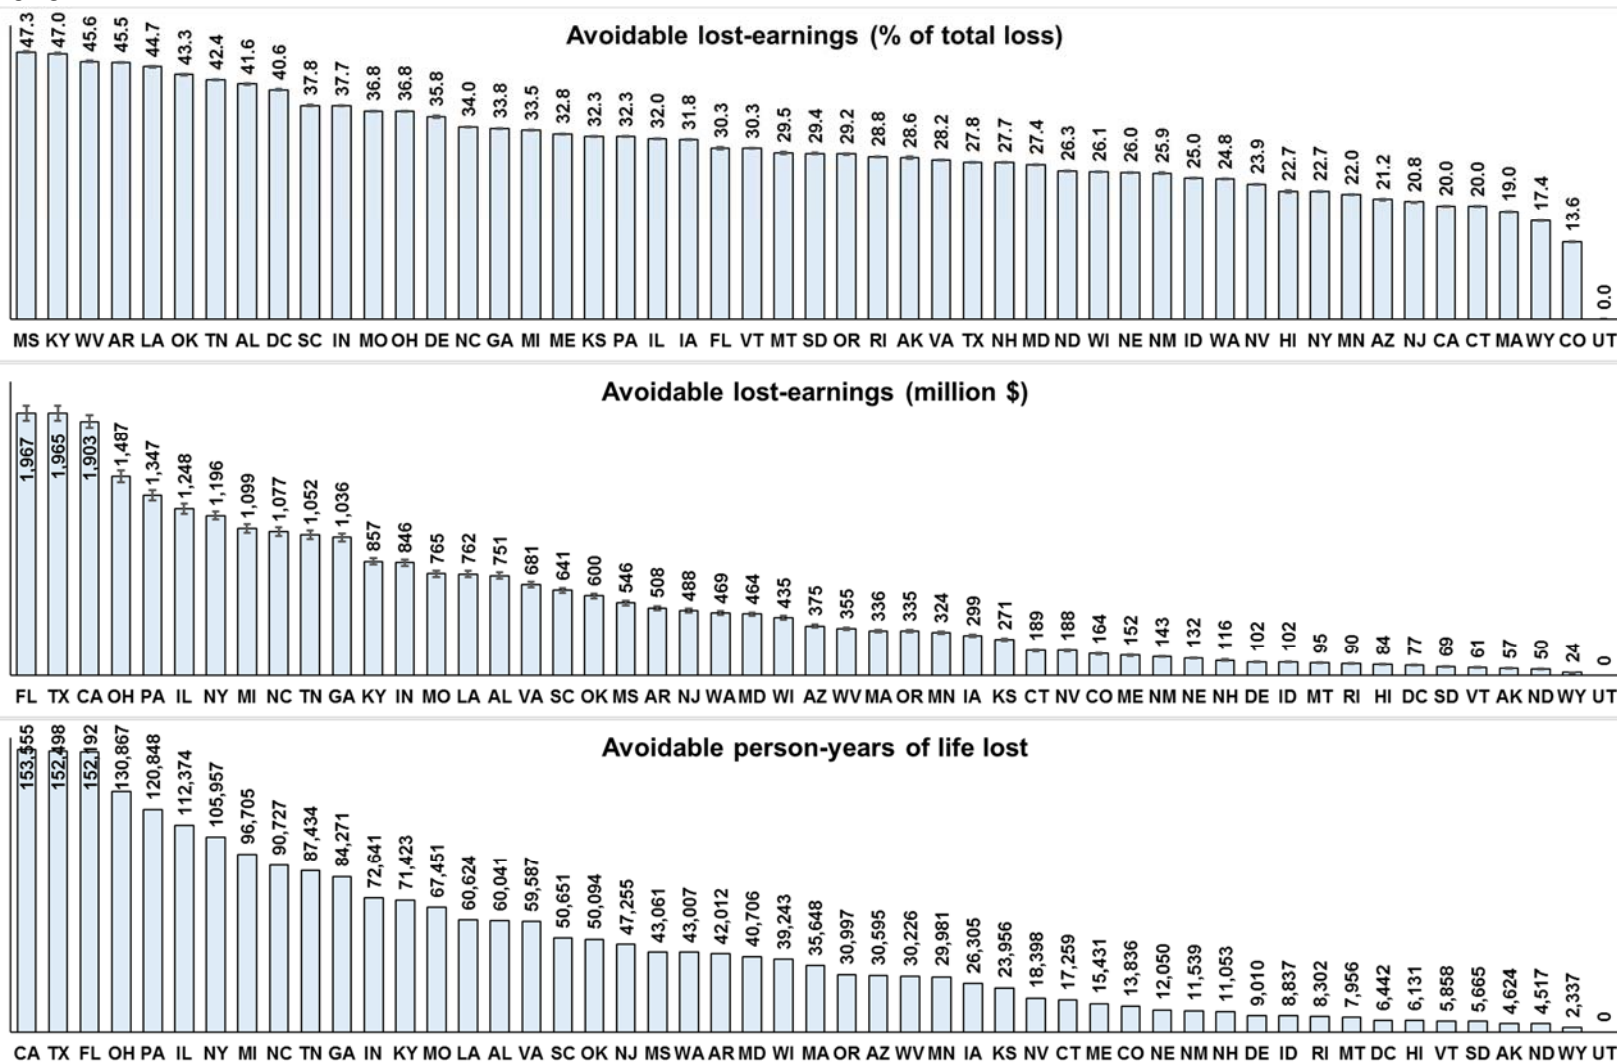

The overall potentially avoidable PYLL and lost earnings in the United States in this scenario was 2,383,447 person-years and \$27.7 billion (95% confidence interval, \$26.9 billion – \$28.5 billion; 29.3% of total lost earnings), respectively. The bars in diagrams for lost earnings represent 95% confidence intervals.

**eFigure 2. Potentially Avoidable Lost Earnings (Calculated Based on Decedents' Education Level) in Ages 16-84 Years in Both Sexes Combined by State if Age-Specific Lost Earning Rates for All Cancers Combined in All States Were Similar to Those in Wyoming, 2015**

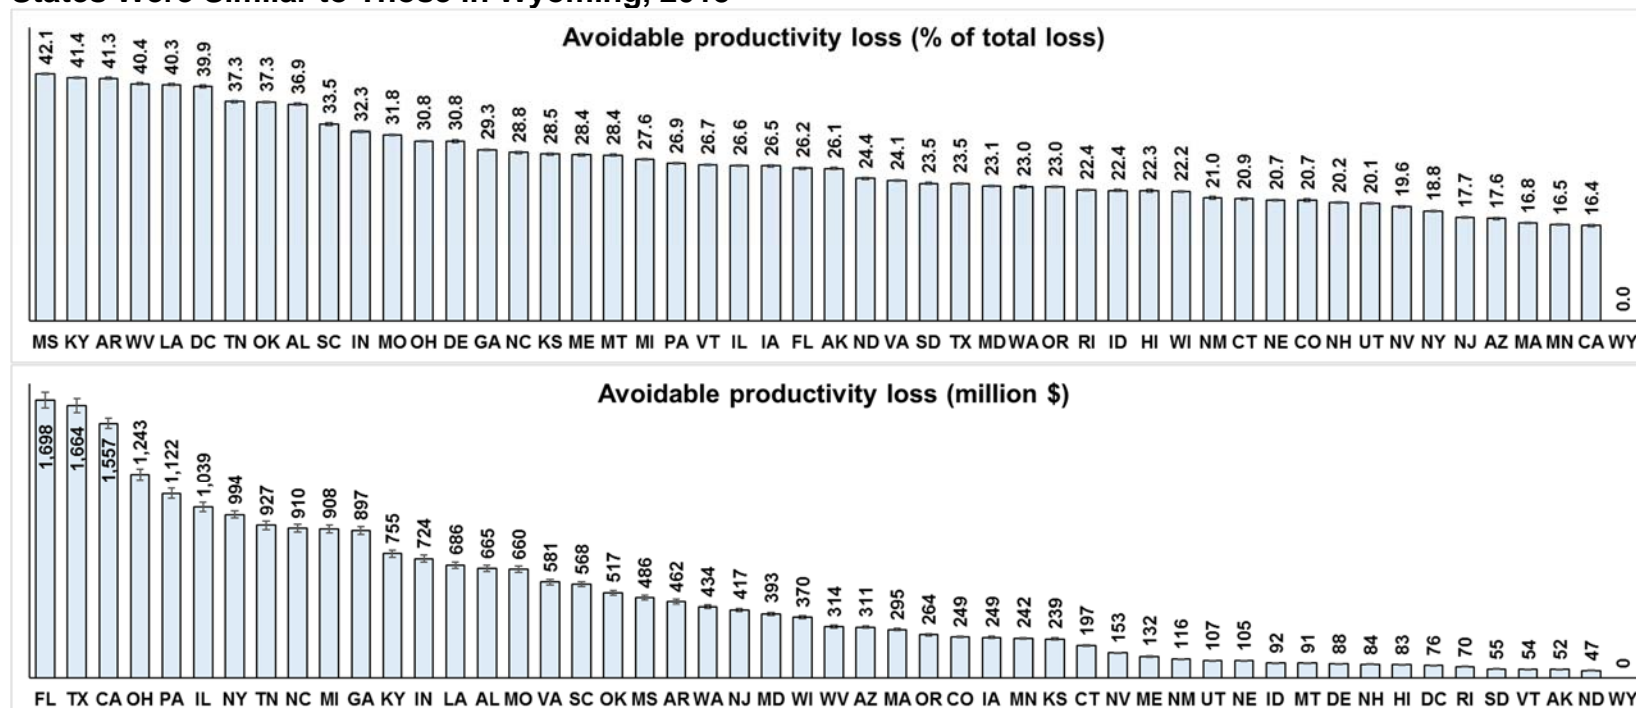

The overall potentially avoidable lost earnings in the United States in this scenario was \$22.9 billion (95% confidence interval, \$22.3 billion – \$23.5 billion; 24.3% of total lost earnings), respectively. The bars in the figure represent 95% confidence intervals.
